# Supplementary material for: Assessment of Genetic Diversity in Seed Plants Based on a Uniform π Criterion
Source: Molecules. 2014 Dec 1;19(12):20113–27. doi: 10.3390/molecules191220113 (PMC6271616; doi:10.3390/molecules191220113)
Supplement: Supplementary file 1 [file molecules-19-20113-s001.xls]

## Sheet: Table S1
Table S1. Summary of the original records of the population-level (Hs) and species-level (Ht) expected heterozygosity estimates derived by the five markers.
Taxon	Marker	Hs	Ht	Author	Year	Reference
Abeliophyllum distichum	Allozyme	0.13	0.178	Kang	2000	Journal of Plant Research 113(1110): 127-138.
Abies alba	Allozyme	0.121		Gomory	2010	Biodiversity and Conservation 19(7): 2025-2038.
Abies alba	SSR	0.657		Gomory	2012	Plant Systematics and Evolution 298(4): 703-712.
Abies sachalinensis	SSR		0.858	Lian	2008	Molecular Ecology 17(12): 2948-2962.
Abies ziyuanensis	AFLP	0.136	0.263	Tang	2008	Annals of Botany 92(3): 409-414.
Abies ziyuanensis	SSR	0.337	0.435	Tang	2008	Genetica 133(1): 21-30.
Abronia alpina	AFLP	0.291	0.351	Jabis	2011	American Journal of Botany 98(10): 1583-1594.
Abronia umbellata ssp. breviflora	ISSR	0.117		McGlaughlin	2002	Conservation Genetics 3(4): 411-420.
Acacia attenuata	Allozyme	0.239		Brownlie	2009	Australian Journal of Botany 57(8): 675-687.
Acacia caven	Allozyme	0.202		Pometti	2011	Plant Systematics and Evolution 292(1-2): 25-32.
Acacia melanoxylon	Allozyme	0.208		Playford	1993	Australian Journal of Botany 41(3): 355-368.
Acacia microbotrya var. borealis	Allozyme	0.177		Elliott	2002	Australian Journal of Botany 50(1): 63-73.
Acacia microbotrya var. microbotrya	Allozyme	0.166		Elliott	2002	Australian Journal of Botany 50(1): 63-73.
Acacia pennata	SSR	0.583		Gao	2012	Conservation Genetics 13(4): 891-898.
Acacia senegal (diploid)	SSR	0.466	0.53	Assoumane	2013	Tree Genetics & Genomes 9(1): 93-106.
Acacia sp. ‘Dandaragan’	Allozyme	0.109		Elliott	2002	Australian Journal of Botany 50(1): 63-73.
Achillea biebersteinii	AFLP		0.184	Rahimmalek	2009	Biochemical Systematics and Ecology 37(4): 354-361.
Achillea filipendulina	AFLP		0.186	Rahimmalek	2009	Biochemical Systematics and Ecology 37(4): 354-361.
Achillea millefolium	AFLP		0.228	Rahimmalek	2009	Biochemical Systematics and Ecology 37(4): 354-361.
Achillea santolina	AFLP		0.08	Rahimmalek	2009	Biochemical Systematics and Ecology 37(4): 354-361.
Achillea tenuifolia	AFLP		0.246	Rahimmalek	2009	Biochemical Systematics and Ecology 37(4): 354-361.
Aciphylla glaucescens	Allozyme	0.21		Mitchell	1999	New Zealand Journal of Ecology 23(1): 61-67.
Acorus calamus	ISSR	0.0834	0.1893	Kareem	2012	Biochemical Systematics and Ecology 40: 156-161.
Adansonia digitata	AFLP	0.299	0.354	Kyndt	2009	American Journal of Botany 96(5): 950-957.
Adenophora grandiflora	Allozyme	0.259	0.266	Chung	1999	Evolution 53(4): 1068-1078.
Adenophora lilifolia	ISSR	0.2282	0.2701	Boronnikova	2009	Russian Journal of Genetics 45(5): 571-574.
Adenophora lobophylla	Allozyme	0.21	0.211	Ge	1999	Conservation Biology 13(3): 509-513.
Adenophora potaninii	Allozyme	0.234	0.244	Ge	1999	Conservation Biology 13(3): 509-513.
Adonis aestivalis	RAPD	0.167		Brutting	2012	Biodiversity and Conservation 21(3): 745-761.
Aegiceras corniculatum	Allozyme	0.021	0.0235	Ge	1999	Molecular Ecology 8(12): 2061-2069.
Aegiceras corniculatum	ISSR	0.032	0.039	Ge	1999	Molecular Ecology 8(12): 2061-2069.
Aegilops cylindrica	SSR	0.24		Gandhi	2009	Theoretical and Applied Genetics 119(6): 1013-1025.
Aegiphila sellowiana	RAPD	0.103	0.189	Medri	2011	Genetics and Molecular Research 10(4): 3186-3198.
Aeluropus lagopoides	RAPD	0.253	0.333	Ahmed	2011	Pakistan Journal of Botany 43(1): 595-605.
Afgekia sericea	RAPD	0.158	0.263	Prathepha	1999	Genetica 105(2): 193-202.
Agalinis auriculata	Allozyme	0.022		Molano-Flores	2007	American Midland Naturalist 158(2): 279-291.
Agalinis auriculata	RAPD	0.11		Molano-Flores	2007	American Midland Naturalist 158(2): 279-291.
Agalinis purpurea	Allozyme		0.199	Molano-Flores	2007	American Midland Naturalist 158(2): 279-291.
Agalinis purpurea	RAPD		0.15	Molano-Flores	2007	American Midland Naturalist 158(2): 279-291.
Agalinis tenuifolia	Allozyme	0.16		Molano-Flores	2007	American Midland Naturalist 158(2): 279-291.
Agalinis tenuifolia	RAPD	0.14		Molano-Flores	2007	American Midland Naturalist 158(2): 279-291.
Agathis robusta	AFLP		0.19	Peakall	2003	Molecular Ecology 12(9): 2331-2343.
Agave cerulata	RAPD		0.237	Navarro-Quezada	2003	Heredity 90(3): 220-227.
Agave cocui	Allozyme	0.054	0.059	Figueredo	2011	Journal of Heredity 102(3): 306-314.
Agave cupreata	Allozyme	0.467		Martinez-Palacios	2011	Revista Fitotecnia Mexicana 34(3): 159-165.
Agave deserti	RAPD		0.186	Navarro-Quezada	2003	Heredity 90(3): 220-227.
Agave lechuguilla	Allozyme	0.394		Silva-Montellano	2003	American Journal of Botany 90(5): 700-706.
Agave subsimplex	RAPD		0.144	Navarro-Quezada	2003	Heredity 90(3): 220-227.
Agave victoriae-reginae	Allozyme	0.33		Martinez-Palacios	1999	American Journal of Botany 86(8): 1093-1098.
Ageratina adenophora	ISSR	0.154	0.235	Gui	2007	Fen Zi Xi Bao Sheng Wu Xue Bao 40(1): 41-48.
Ainsliaea faurieana	SSR	0.415		Mitsui	2010	American Journal of Botany 97(1): 101-110.
Alcantarea geniculata	SSR	0.381	0.429	Barbara	2007	Molecular Ecology 16(10): 1981-1992.
Alcantarea glaziouana	SSR	0.334	0.472	Barbara	2009	Annals of Botany 103(1): 65-77.
Alcantarea imperialis	SSR	0.399	0.615	Barbara	2007	Molecular Ecology 16(10): 1981-1992.
Alcantarea regina	SSR	0.459	0.523	Barbara	2009	Annals of Botany 103(1): 65-77.
Alhagi sparsifolia	AFLP	0.27		Vonlanthen	2010	American Journal of Botany 97(2): 234-242.
Allocasuarina emuina	SSR	0.587		Lamont	2012	Australian Journal of Botany 60(8): 718-734.
Alopecurus myosuroides	AFLP	0.24	0.246	Menchari	2007	Molecular Ecology 16(15): 3161-3172.
Alphitonia ponderosa	RAPD	0.085	0.118	Kwon	2002	Molecular Ecology 11(6): 991-1001.
Alyssum montanum	RAPD	0.132		Rusterholz	2012	Alpine Botany 122(2): 109-117.
Ambrosia artemisiifolia	AFLP	0.274		Li	2012	Plos One 7(2): e31935.
Ambrosia artemisiifolia	SSR	0.758		Gaudeul	2011	Plos One 6(3): e17658.
Amentotaxus argotaenia	ISSR	0.0379	0.1839	Ge	2005	Journal of Plant Research 118(6): 415-422.
Amentotaxus formosana	ISSR		0.0433	Ge	2005	Journal of Plant Research 118(6): 415-422.
Amentotaxus yunnanensis	ISSR	0.0428	0.1413	Ge	2005	Journal of Plant Research 118(6): 415-422.
Ammophila arenaria	ISSR	0.2341		Rodriguez-Echeverria	2008	Journal of Coastal Research 24(1): 122-126.
Ammopiptanthus nanus	AFLP	0.041	0.053	Chen	2009	Journal of Systematics and Evolution 47(1): 57-66.
Ammopiptanthus nanus	Allozyme	0.036	0.04	Chen	2009	Journal of Systematics and Evolution 47(1): 57-66.
Amorpha georgiana	SSR		0.749	Straub	2009	Molecular Ecology 18(21): 4349-4365.
Amphicarpaea edgeworthii	RAPD	0.144	0.273	Zhang	2005	Biochemical Systematics and Ecology 33(12): 1246-1257.
Anacardium occidentale	AFLP	0.255	0.262	Archak	2009	Genome 52(3): 222-230.
Anagallis arvensis	RAPD	0.159		Brutting	2012	Biodiversity and Conservation 21(3): 745-761.
Anagallis foemina	RAPD	0.055		Brutting	2012	Biodiversity and Conservation 21(3): 745-761.
Anagyris latifolia	RAPD	0.124	0.2	Gonzalez-Perez	2009	Plant Systematics and Evolution 279(1-4): 59-68.
Ancistrocladus korupensi	Allozyme	0.042	0.041	Foster	1997	American Journal of Botany 84(8): 1078-1091.
Androsace obtusifolia	AFLP	0.08	0.16	Meirmans	2011	Molecular Ecology 20(15): 3144-3155.
Androsace tapete	ISSR	0.3272		Geng	2009	Genetica 135(3): 419-427.
Anemone nemorosa	Allozyme	0.61	0.86	Stehlik	2000	Journal of Ecology 88(3): 424-435.
Anemopaegma arvense	RAPD	0.284		Batistini	2009	Genetics and Molecular Research 8(1): 52-63.
Angelica palustris	RAPD	0.173		Dittbrenner	2005	Plant Species Biology 20(3): 191-200.
Anisodus tanguticus	RAPD	0.1948	0.3015	Zheng	2008	Genetica 132(2): 123-129.
Annona crassiflora	RAPD	0.26	0.31	Cota	2011	Genetics and Molecular Research 10(3): 2172-2180.
Anthoxanthum alpinum	AFLP		0.48	Pimentel	2007	Molecular Phylogenetics and Evolution 44(2): 667-684.
Anthoxanthum amarum	AFLP		0.24	Pimentel	2007	Molecular Phylogenetics and Evolution 44(2): 667-684.
Anthoxanthum amarum	RAPD	0.38	0.46	Pimentel	2007	Botanical Journal of the Linnean Society 155(2): 179-192.
Anthoxanthum aristatum	AFLP		0.66	Pimentel	2007	Molecular Phylogenetics and Evolution 44(2): 667-684.
Anthoxanthum gracile	AFLP		0.06	Pimentel	2007	Molecular Phylogenetics and Evolution 44(2): 667-684.
Anthoxanthum maderense	AFLP		0.18	Pimentel	2007	Molecular Phylogenetics and Evolution 44(2): 667-684.
Anthoxanthum odoratum	AFLP		0.38	Pimentel	2007	Molecular Phylogenetics and Evolution 44(2): 667-684.
Anthoxanthum ovatum	AFLP		0.56	Pimentel	2007	Molecular Phylogenetics and Evolution 44(2): 667-684.
Anthyllis rupestris	ISSR	0.212	0.3049	Gomez-Gomez	2012	Biochemical Systematics and Ecology 45: 138-147.
Antirhea aromatica (adults)	Allozyme	0.1849		Gonzalez-Astorga	2004	Annals of Botany 93(5): 521-528.
Antirhea borbonica	AFLP	0.234		Litrico	2005	Molecular Ecology 14(5): 1575-1584.
Antirhea borbonica	SSR	0.424		Litrico	2005	Molecular Ecology 14(5): 1575-1584.
Antirrhinum microphyllum	Allozyme	0.204	0.218	Torres	2003	American Journal of Botany 90(1): 85-92.
Antirrhinum microphyllum	RAPD	0.171	0.188	Torres	2003	American Journal of Botany 90(1): 85-92.
Aquilegia paui	Allozyme	0.006		Martinell	2010	Biochemical Systematics and Ecology 38(3): 390-397.
Aquilegia vulgaris	Allozyme	0.028		Martinell	2010	Biochemical Systematics and Ecology 38(3): 390-397.
Arabidopsis arenosa ssp. arenosa	AFLP		0.157	Schmickl	2012	Plos One 7(8): e42691.
Arabidopsis arenosa ssp. borbasii	AFLP		0.155	Schmickl	2012	Plos One 7(8): e42691.
Arabidopsis carpatica	AFLP		0.138	Schmickl	2012	Plos One 7(8): e42691.
Arabidopsis halleri	SSR		0.4542	Llaurens	2008	Molecular Ecology 17(6): 1577-1588.
Arabidopsis lyrata	Allozyme	0.277		Ansell	2010	Heredity 105(6): 543-553.
Arabidopsis lyrata	SSR	0.351	0.67	Muller	2008	Heredity 100(1): 47-58.
Arabidopsis lyrata ssp. petraea	RAPD		0.169	Fedorenko	2011	Russian Journal of Genetics 47(4): 446-452.
Arabidopsis neglecta	AFLP		0.125	Schmickl	2012	Plos One 7(8): e42691.
Arabidopsis petrogena	AFLP		0.138	Schmickl	2012	Plos One 7(8): e42691.
Arabidopsis thaliana	AFLP	0.104	0.135	Jorgensen	2004	Molecular Ecology 13(11): 3403-3413.
Arabidopsis thaliana	Allozyme	0.0569	0.1483	Abbot	1989	Heredity 62: 411-418.
Arabidopsis thaliana	RAPD	0.126		Fedorenko	2011	Russian Journal of Genetics 47(4): 446-452.
Arabidopsis thaliana	SSR		0.794	Innan	1997	Genetics 146(4): 1441-1452.
Arabis alpina	AFLP	0.05	0.17	Meirmans	2011	Molecular Ecology 20(15): 3144-3155.
Arabis alpina	Allozyme		0.098	Ansell	2008	Molecular Ecology 17(9): 2245-2257.
Arabis alpina	SSR		0.54	Buehler	2012	Annals of Botany 109(7): 1359-1367.
Arabis serrata	Allozyme	0.14		Oyama	1993	Journal of Plant Research 106(1082): 143-148.
Arachis hypogaea	SSR		0.686	Moretzsohn Mde	2004	BMC Plant Biology 4: 11.
Arachis pintoi	RAPD		0.29	Carvalho	2010	Plant Systematics and Evolution 288(3-4): 245-251.
Araucaria angustifolia	AFLP	0.249	0.298	Stefenon	2008	Forest Ecology and Management 255(7): 2718-2725.
Araucaria angustifolia	Allozyme		0.17	Mantovani	2006	Journal of Heredity 97(5): 466-472.
Araucaria angustifolia	SSR	0.686	0.721	Stefenon	2008	Forest Ecology and Management 255(7): 2718-2725.
Araucaria cunninghamii	AFLP		0.14	Peakall	2003	Molecular Ecology 12(9): 2331-2343.
Arbutus menziesii	AFLP	0.094		Beland	2005	Canadian Journal of Botany 83(12): 1581-1589.
Arceuthobium americanum	AFLP	0.17	0.238	Jerome	2002	Molecular Ecology 11(3): 387-405.
Ardisia crenata	SSR	0.312	0.778	Mu	2010	Journal of Systematics and Evolution 48(4): 279-285.
Ardisia crenata var. bicolor	RAPD	0.106	0.192	Zhao	2006	Biodiversity and Conservation 15(4): 1339-1351.
Argyroderma pearsonii	AFLP	0.182		Ellis	2007	New Phytologist 174(4): 904-914.
Argyroxiphium kauense	SSR	0.313		Friar	2001	Molecular Ecology 10(7): 1657-1663.
Argyroxiphium sandwicense	SSR	0.204		Friar	2000	Molecular Ecology 9(12): 2027-2034.
Aristida stricta	ISSR	0.05		Sharma	2011	Genetica 139(2): 261-271.
Aristolochia contorta	Allozyme	0.101	0.119	Nakonechnaya	2012	Russian Journal of Genetics 48(2): 152-162.
Aristolochia manshuriensis	Allozyme	0.1	0.11	Nakonechnaya	2007	Russian Journal of Genetics 43(2): 156-164.
Armeria maderensis	AFLP		0.14	Pineiro	2009	Folia Geobotanica 44(1): 65-81.
Armeria pungens	AFLP	0.11		Pineiro	2007	Molecular Ecology 16(10): 2155-2171.
Artemisia annua	ISSR	0.327	0.367	Kumar	2011	Journal of Medicinal Plants Research 5(23): 5568-5576.
Artemisia annua	RAPD	0.363	0.407	Kumar	2011	Journal of Medicinal Plants Research 5(23): 5568-5576.
Asclepias exaltata	Allozyme	0.133		Broyles	1998	American Journal of Botany 85(8): 1091-1097.
Asclepias meadii	Allozyme	0.151		Tecic	1998	Annals of the Missouri Botanical Garden 85(1): 97-109.
Asimina triloba (domesticated)	AFLP		0.071	Wang	2005	Journal of the American Society for Horticultural Science 130(4): 561-568.
Asimina triloba (domesticated)	ISSR		0.358	Pomper	2003	Journal of the American Society for Horticultural Science 128(4): 521-525.
Asimina triloba (wild)	AFLP		0.077	Wang	2005	Journal of the American Society for Horticultural Science 130(4): 561-568.
Asparagus acutifolius	ISSR	0.1424	0.2618	Sica	2005	BMC Genetics 6: 17.
Aspidosperma polyneuron	AFLP	0.34	0.387	Damasceno	2011	Genetics and Molecular Research 10(2): 1180-7.
Aster spathulifolius	Allozyme	0.102	0.2	Maki	1998	International Journal of Plant Sciences 159(1): 148-152.
Astragalus bibullatus	AFLP	0.12		Baskauf	2009	Journal of Heredity 100(4): 424-431.
Astragalus bibullatus	Allozyme	0.16		Morris	2002	American Journal of Botany 89(1): 29-36.
Astragalus nitidiflorus	ISSR	0.1298	0.1712	Vicente	2011	Biochemical Systematics and Ecology 39(3): 175-182.
Atractylis preauxiana	RAPD	0.162	0.25	Caujape-Castells	2008	Plant Systematics and Evolution 274(1-2): 99-109.
Atractylodes macrocepha	ISSR	0.259	0.3138	Liu	2008	Zhongguo Zhong Yao Za Zhi 33(23): 2756-2760.
Atriplex tatarica	Allozyme	0.155	0.196	Mandak	2005	Annals of Botany 96(5): 901-912.
Aucoumea klaineana	SSR	0.504		Born	2011	Molecular Ecology 20(1): 131-142.
Austrocedrus chilensis	SSR	0.77		Arana	2010	Molecular Phylogenetics and Evolution 54(3): 941-949.
Austromyrtus acmenoides	Allozyme		0.258	Shapcott	1996	Biodiversity and Conservation 5(7): 881-895.
Austromyrtus bidwillii	Allozyme	0.214		Shapcott	1996	Biodiversity and Conservation 5(7): 881-895.
Austromyrtus gonoclada	Allozyme	0.266		Shapcott	1996	Biodiversity and Conservation 5(7): 881-895.
Austromyrtus hillii	Allozyme	0.12		Shapcott	1996	Biodiversity and Conservation 5(7): 881-895.
Austromyrtus inophloia	Allozyme	0.145		Shapcott	1996	Biodiversity and Conservation 5(7): 881-895.
Avena agadiriana	Allozyme	0.1526		Morikawa	2005	Genetic Resources and Crop Evolution 52(4): 363-370.
Avena maroccana	Allozyme		0.2462	Morikawa	2008	Genetic Resources and Crop Evolution 55(8): 1313-1321.
Avicennia germinans	AFLP	0.131	0.212	Dodd	2002	Molecular Ecology 11(8): 1327-1238.
Avicennia marina	AFLP	0.062	0.086	Giang	2003	Genes & Genetic Systems 78(6): 399-407.
Avicennia marina	SSR	0.34		Arnaud-Haond	2006	Molecular Ecology 15(12): 3515-3525.
Azadirachta indica	RAPD		0.49	Deshwal	2005	Genetic Resources and Crop Evolution 52(3): 285-292.
Bactris gasipaes	AFLP	0.2499		Adin	2004	Theoretical and Applied Genetics 108(8): 1564-1573.
Baillonella toxisperma	SSR	0.57		Ndiade-Bourobou	2010	Molecular Ecology 19(22): 4949-4962.
Banksia attenuata	SSR	0.735		He	2008	Journal of Ecology 96(5): 956-961.
Banksia candolleana	SSR	0.72		Merwin	2012	Plos One 7(11): e50974.
Banksia hookeriana	AFLP	0.171	0.205	Krauss	2006	Molecular Ecology 15(4): 1125-1137.
Banksia saxicola	AFLP	0.22	0.31	Evans	2001	Plant Systematics and Evolution 227(1-2): 105-115.
Baptisia arachnifera	Allozyme	0.07	0.097	Ceska	1997	Conservation Biology 11(5): 1133-1139.
Batrachium bungei	ISSR	0.0262	0.1649	Wang	2010	Aquatic Botany 92(3): 221-225.
Berchemiella wilsonii var. pubipetiolata	SSR	0.505	0.503	Kang	2008	Conservation Genetics 9(1): 191-199.
Beta vulgaris	SSR		0.563	Arnaud	2011	Heredity 107(5): 395-404.
Beta vulgaris ssp. maritima	Allozyme	0.19	0.19	Bartsch	1999	Molecular Ecology 8(10): 1733-1741.
Beta vulgaris ssp. vulgaris	Allozyme	0.2	0.21	Bartsch	1999	Molecular Ecology 8(10): 1733-1741.
Beta vulgaris ssp. vulgaris var. rapacea	AFLP	0.15	0.267	Poulsen	2007	Genetic Resources and Crop Evolution 54(5): 1105-1115.
Betula humilis	SSR	0.496		Jadwiszczak	2011	Plant Biosystems 145(4): 893-900.
Betula maximowicziana	SSR	0.37	0.353	Uchiyama	2006	Forest Ecology and Management 237(1-3): 119-126.
Betula nana	Allozyme	0.119	0.141	Alsos	2002	Arctic Antarctic and Alpine Research 34(4): 408-418.
Bidens alba	Allozyme	0.006	0.005	Grombone-Guaratini	2005	Biochemical Genetics 43(7-8): 335-345.
Bidens pilosa	Allozyme	0.071	0.003	Grombone-Guaratini	2005	Biochemical Genetics 43(7-8): 335-345.
Bidens subalternans	Allozyme	0.006	0.001	Grombone-Guaratini	2005	Biochemical Genetics 43(7-8): 335-345.
Biscutella neustriaca	SSR	0.584		Leducq	2013	Conservation Genetics 14(1): 65-77.
Bixa orellana	Allozyme	0.064		de Carvalho	2005	Pesquisa Agropecuaria Brasileira 40(7): 653-660.
Boechera fecunda	SSR	0.2	0.46	Song	2007	Molecular Ecology 16(19): 4079-4088.
Boechera stricta	SSR	0.26	0.57	Song	2006	Molecular Ecology 15(2): 357-369.
Boleum asperum	AFLP	0.716	0.744	Perez-Collazos	2008	Biological Journal of the Linnean Society 94(2): 341-354.
Boltonia decurrens	Allozyme	0.314		DeWoody	2004	Conservation Genetics 5(5): 603-617.
Borago officinalis (domesticated)	RAPD	0.185		Sales	2008	Botany 86(6): 603-609.
Borago officinalis (wild)	RAPD	0.15		Sales	2008	Botany 86(6): 603-609.
Borderea chouardii	Allozyme		0.0465	Segarra-Moragues	2002	International Journal of Plant Sciences 163(1): 159-166.
Borderea chouardii	RAPD		0.14	Segarra-Moragues	2005	Molecular Ecology 14(4): 969-982.
Borderea chouardii	SSR		0.17	Segarra-Moragues	2005	Molecular Ecology 14(4): 969-982.
Borderea pyrenaica	Allozyme	0.0704	0.0736	Segarra-Moragues	2002	International Journal of Plant Sciences 163(1): 159-166.
Borderea pyrenaica	SSR	0.193		Segarra-Moragues	2007	Journal of Biogeography 34(11): 1893-1906.
Boswellia sacra	ISSR	0.136	0.222	Coppi	2010	Genetic Resources and Crop Evolution 57(7): 1041-1052.
Bouteloua gracilis	RAPD	0.2641		Aguado-Santacruz	2004	Plant Ecology 170(2): 287-299.
Brasenia schreberi	AFLP	0.19		Kim	2008	Journal of Plant Research 118(2): 147-153.
Brasenia schreberi	RAPD	0.059		Kim	2008	Journal of Plant Biology 51(4): 260-268.
Brassica cretica	SSR	0.211		Edh	2007	Molecular Ecology 16(23): 4972-4983.
Brassica incana	Allozyme	0.2	0.338	Geraci	2004	Genetic Resources and Crop Evolution 51(2): 137-146.
Brassica napus	SSR		0.5	Bus	2011	Theoretical and Applied Genetics 123(8): 1413-1423.
Brassica nigra	AFLP	0.1494		Watson-Jones	2006	Biological Conservation 132(4): 490-499.
Brassica oleracea	AFLP	0.2577		Watson-Jones	2006	Biological Conservation 132(4): 490-499.
Brassica oleracea	Allozyme	0.4		Lanner-Herrera	1996	Genetic Resources and Crop Evolution 43(1): 13-23.
Brassica oleracea	RAPD	0.49		Lanner-Herrera	1996	Genetic Resources and Crop Evolution 43(1): 13-23.
Brassica oleracea	SSR	0.272	0.363	Raybould	1999	Genetic Resources and Crop Evolution 46(4): 351-360.
Brassica rapa	AFLP	0.1717		Watson-Jones	2006	Biological Conservation 132(4): 490-499.
Brassica rapa	SSR		0.613	Pino Del Carpio	2011	Theoretical and Applied Genetics 122(6): 1105-1118.
Brassica rapa	Allozyme	0.291	0.38	Persson	2001	Hereditas 134(1): 43-52.
Brassica rupestris	Allozyme	0.178	0.287	Geraci	2004	Genetic Resources and Crop Evolution 51(2): 137-146.
Brassica rupestris	ISSR	0.212	0.307	Raimondo	2012	Plant Biosystems 146(4): 847-856.
Brassica villosa	Allozyme	0.229	0.391	Geraci	2004	Genetic Resources and Crop Evolution 51(2): 137-146.
Brighamia insignis	Allozyme	0.056	0.063	Gemmill	1998	American Journal of Botany 85(4): 528-539.
Brighamia rockii	Allozyme	0.057	0.063	Gemmill	1998	American Journal of Botany 85(4): 528-539.
Briza media	AFLP	0.262		Hahn	2012	Plos One 7(8): e41608.
Bromelia antiacantha	SSR	0.559	0.573	Zanella	2011	American Journal of Botany 98(9): 1511-1519.
Bromus ircutensis	ISSR	0.242	0.292	Yu	2011	Genetika 47(6): 796-804.
Bromus tectorum	Allozyme	0.014		Huttanus	2011	International Journal of Plant Sciences 172(6): 783-794.
Bromus tectorum	SSR	0.303		Merrill	2012	American Journal of Botany 99(3): 529-537.
Bruguiera gymnorrhiza	Allozyme	0.404	0.365	Ge	2005	Journal of Experimental Marine Biology and Ecology 326(1): 48-55.
Bryonia alba	Allozyme		0.058	Novak	1995	American Journal of Botany 82(9): 1153-1162.
Bulbophyllum drymoglossum	Allozyme	0.011	0.016	Chung	2007	Biodiversity and Conservation 16(3): 775-786.
Bupleurum rotundifolium	AFLP	0.081		Brutting	2012	Agriculture Ecosystems & Environment 161: 70-77.
Bupleurum rotundifolium	RAPD	0.071		Brutting	2012	Biodiversity and Conservation 21(3): 745-761.
Cakile edentula	Allozyme	0.041	0.118	Gormally	2011	American Journal of Botany 98(10): 1657-1662.
Cakile maritima	AFLP	0.186		Westberg	2009	Journal of Biogeography 36(7): 1398-1410.
Cakile maritima	Allozyme	0.33		Thrall	2000	Australian Journal of Botany 48(6): 731-738.
Caladenia tentachulata	Allozyme		0.4	Smouse	1999	Heredity 82: 561-573.
Calamus thwaitesii	ISSR	0.141		Ramesha	2007	Journal of Genetics 86(1): 9-18.
Caldesia grandis	RAPD	0.1173	0.1368	Chen	2006	Aquatic Botany 84(4): 301-307.
Callitriche cophocarpa	Allozyme	0.0421	0.083	Buczkowska	2008	Acta Biologica Cracoviensia Series Botanica 50(2): 63-70.
Calluna vulgaris	Allozyme	0.133		Mahy	1999	Heredity 82: 654-660.
Calocedrus macrolepis	ISSR	0.1114	0.116	Wang	2004	Biochemical Systematics and Ecology 32(9): 797-807.
Calothamnus quadrifidus	SSR		0.867	Byrne	2007	Molecular Ecology 16(6): 1303-1314.
Calycanthus chinensis	RAPD	0.1641	0.2097	Fan	2008	Canadian Journal of Plant Science 88(1): 179-186.
Calystegia collina	SSR	0.61		Williams	2000	Heredity 84 (2): 261-268.
Calystegia soldanella	SSR		0.441	Noda	2011	Biological Journal of the Linnean Society 102(1): 51-66.
Camellia euphlebia	ISSR	0.11	0.1537	Wei	2005	Annales Botanici Fennici 42(5): 365-370.
Camellia japonica	SSR		0.84	Ueno	2000	Molecular Ecology 9(6): 647-656.
Camellia nitidissima	AFLP	0.1288	0.2444	Tang	2006	Genetica 133(1): 21-30.
Camellia nitidissima	RAPD	0.1069	0.2698	Tang	2006	Biochemical Genetics 44(9-10): 449-461.
Camellia reticulata	ISSR	0.14	0.2809	Wang	2012	Genetics and Molecular Research 11(1): 503-511.
Camellia sinensis	AFLP		0.399	Karthigeyan	2008	Biochemical Genetics 46 (11-12): 810-819.
Camellia sinensis	ISSR	0.17	0.22	Yao	2008	Plant Breeding 127(2): 166-172.
Camellia sinensis	RAPD	0.325	0.398	Kaundun	2002	Crop Science 42(2): 594-601.
Campanula barbata	AFLP	0.09	0.17	Meirmans	2011	Molecular Ecology 20(15): 3144-3155.
Campanula pollinensis	ISSR	0.24		Bellucci	2005	Plant Biosystems 139(3): 349-356.
Campanula sabatia	AFLP	0.1853	0.2415	Nicoletti	2012	Folia Geobotanica 47(3): 249-262.
Campanula thyrsoides	RAPD	0.2		Kuss	2008	Journal of Plant Ecology 1(3): 149-159.
Campanula thyrsoides	SSR	0.751		Kuss	2011	Perspectives in Plant Ecology Evolution and Systematics 13(2): 101-110.
Campnosperma brevipetiolata	Allozyme	0.109	0.122	Sheely	1996	American Journal of Botany 83(12): 1571-1579.
Capsella rubella	SSR	0.178		Caullet	2011	American Journal of Botany 98(7): E176-E179.
Capsicum annuum (domesticated)	RAPD	0.081	0.131	Oyama	2006	Genetic Resources and Crop Evolution 53(3): 553-562.
Capsicum annuum (domesticated)	SSR	0.422	0.648	Pacheco-Olvera	2012	Crop Science 52(1): 231-241.
Capsicum annuum (wild)	RAPD	0.069	0.165	Oyama	2006	Genetic Resources and Crop Evolution 53(3): 553-562.
Capsicum annuum (wild)	SSR	0.466	0.658	Pacheco-Olvera	2012	Crop Science 52(1): 231-241.
Caragana korshinskyi	Allozyme	0.2691	0.3014	Wang	2006	Genetic Resources and Crop Evolution 53(8): 1689-1697.
Caragana microphylla	AFLP	0.1817	0.1963	Chen	2009	Biochemical Systematics and Ecology 37(4): 395-401.
Caragana microphylla	RAPD	0.1829	0.1969	Chen	2011	Russian Journal of Genetics 47(9): 1058-1065.
Carapa guianensis	SSR	0.604		Martins	2012	Genetics and Molecular Biology 35(4): 818-826.
Carduus acanthoides	Allozyme	0.364	0.398	Mandak	2009	Biological Journal of the Linnean Society 98(3): 596-607.
Carex atrofusca	AFLP	0.0124		Schonswetter	2006	Journal of Biogeography 33(5): 948-956.
Carex bigelowii	AFLP	0.0667		Schonswetter	2008	Journal of Biogeography 33(5): 948-956.
Carex bigelowii (ramet)	Allozyme	0.125	0.144	Stenstrom	2001	Molecular Ecology 10(2): 497-513.
Carex davalliana	Allozyme	0.14		Hooftman	2004	Conservation Biology 18(4): 1043-1051.
Carex ensifolia (ramet)	Allozyme	0.326	0.419	Stenstrom	2001	Molecular Ecology 10(2): 497-513.
Carex extensa	AFLP	0.039	0.106	Escudero	2010	American Journal of Botany 95(6): 745-755.
Carex extensa	SSR	0.1	0.539	Escudero	2010	Molecular Ecology 19(2): 352-370.
Carex firma	AFLP	0.21	0.31	Meirmans	2011	Molecular Ecology 20(15): 3144-3155.
Carex helodes	AFLP	0.0797		Escudero	2008	Molecular Ecology 19(2): 352-370.
Carex kobomugi	SSR	0.589		Ohsako	2010	American Journal of Botany 97(3): 458-470.
Carex lasiocarpa	Allozyme	0.2	0.27	McClintock	1993	American Journal of Botany 80(11): 1251-1263.
Carex latebracteata	AFLP	0.138		Ford	2009	Botany 87(8): 770-779.
Carex lugens (ramet)	Allozyme	0.337	0.359	Stenstrom	2001	Molecular Ecology 10(2): 497-513.
Carex macrocephala	SSR		0.459	King	2009	Molecular Ecology 18(20): 4256-4269.
Carex mitchelliana	Allozyme	0.0371		Bruederle	1999	Journal of the Torrey Botanical Society 126(1): 1-8.
Carex pellita	Allozyme	0.28	0.25	McClintock	1993	American Journal of Botany 80(11): 1251-1263.
Carex sempervirens	AFLP	0.07	0.12	Meirmans	2011	Molecular Ecology 20(15): 3144-3155.
Carex stans (ramet)	Allozyme	0.192	0.283	Stenstrom	2001	Molecular Ecology 10(2): 497-513.
Carpobrotus chilensis	Allozyme	0.042	0.048	Gallagher	1997	American Journal of Botany 84(7): 905-911.
Carpobrotus edulis	Allozyme	0.167	0.2	Gallagher	1997	American Journal of Botany 84(7): 905-911.
Carthamus tinctorius	SSR		0.44	Chapman	2010	American Journal of Botany 97(5): 831-840.
Carya illinoensis	SSR	0.25		Jia	2011	Molecules 16(12): 10078-10092.
Caryocar brasiliense	SSR	0.856		Collevatti	2001	Molecular Ecology 10(2): 349-356.
Castanea dentata	Allozyme	0.167	0.214	Dane	2003	Heredity 91(3): 314-321.
Castanea dentata	RAPD	0.363		Huang	1998	American Journal of Botany 85(7): 1013-1021.
Castanea henryi	Allozyme	0.261	0.282	Dane	2003	Heredity 91(3): 314-321.
Castanea mollissima	Allozyme	0.311	0.321	Dane	2003	Heredity 91(3): 314-321.
Castanea mollissima	ISSR	0.2004	0.2697	Ai	2007	Sheng Wu Gong Cheng Xue Bao 23(4): 628-633.
Castanea pumila var. ozarkensis	Allozyme	0.228	0.231	Dane	2003	Heredity 91(3): 314-321.
Castanea pumila var. pumila	Allozyme	0.296	0.296	Dane	2003	Heredity 91(3): 314-321.
Castanea sativa	Allozyme	0.292		Villani	1999	Journal of Evolutionary Biology 12(2): 233-244.
Castanea seguinii	Allozyme	0.186	0.187	Dane	2003	Heredity 91(3): 314-321.
Castanopsis carlesii	Allozyme	0.27		Cheng	2006	Annals of Botany 98(3): 601-608.
Castanopsis chinensis	SSR		0.696	Wang	2012	Oikos 121(12): 2044-2051.
Castanopsis eyrei	SSR	0.78	0.82	Shi	2011	Plos One 6(6): e21302.
Castanopsis fargesii	RAPD	0.2833	0.296	Zhu	2002	Acta Botanica Sinica 44(11): 1321-1326.
Castanopsis sclerophylla	SSR	0.485		Zhang	2012	Plos One 7(6): e39146.
Castilleja grisea	Allozyme	0.099	0.137	Helenurm	2005	Annals of Botany 95(7): 1221-1227.
Castilleja levisecta	Allozyme	0.213	0.285	Godt	2005	Conservation Genetics 6(1): 87-99.
Casuarina cunninghamiana	ISSR	0.0922		Ho	2011	African Journal of Agricultural Research 6(25): 5664-5671.
Casuarina equisetifolia	ISSR	0.1288		Ho	2011	African Journal of Agricultural Research 6(25): 5664-5671.
Casuarina glauca	ISSR	0.0577		Ho	2011	African Journal of Agricultural Research 6(25): 5664-5671.
Catananche lutea	AFLP	0.137		Gemeinholzer	2012	Plant Systematics and Evolution 298(8): 1585-1596.
Catasetum viridiflavum	Allozyme	0.31		Murren	2003	Journal of Evolutionary Biology 16(2): 333-342.
Cathaya argyrophylla	Allozyme	0.102		Ge	1998	International Journal of Plant Sciences 159(2): 351-357.
Cedrela odorata	AFLP	0.17	0.22	De la Torre	2008	Forest Ecology and Management 255(2): 334-339.
Cedrus atlantica	AFLP	0.132		Terrab	2008	American Journal of Botany 95(10): 1262-1269.
Centaurea corymbosa	Allozyme	0.2		Freville	2001	Molecular Ecology 10(4): 879-889.
Centaurea corymbosa	SSR	0.5		Freville	2001	Molecular Ecology 10(4): 879-889.
Centaurea horrida	SSR	0.779		Mameli	2008	Annals of Botany 101(5): 633-640.
Centaurea wiedemanniana	RAPD	0.196	0.278	Sozen	2010	Ekoloji 19(77): 1-8.
Centaurium erythraea	Allozyme	0.021		Van Rossum	2009	Plant Biology 11(5): 725-737.
Centella asiatica	ISSR	0.074	0.218	Zhang	2012	Journal of Natural Medicines 66(1): 241-247.
Cephalanthera longibracteata	Allozyme	0.036		Chung	2004	American Journal of Botany 91(1): 52-57.
Cephalanthera longifolia	Allozyme	0.168		Scacchi	1991	Plant Systematics and Evolution 176(1-2): 53-61.
Cephalanthera rubra	Allozyme	0.127		Scacchi	1991	Plant Systematics and Evolution 176(1-2): 53-61.
Cerastium arvense	Allozyme	0.21	0.254	Quiroga	2002	Canadian Journal of Botany 80(7): 786-795.
Cerastium uniflorum	AFLP	0.1	0.2	Meirmans	2011	Molecular Ecology 20(15): 3144-3155.
Cerasus jamasakura	SSR	0.754		Tsuda	2009	Journal of Plant Research 122(4): 367-375.
Ceratiola ericoides	Allozyme	0.079	0.109	Trapnell	2007	Journal of Heredity 98(6): 587-593.
Ceratocapnos claviculata	AFLP	0.004	0.022	Voss	2012	Annals of Botany 110(3): 585-593.
Ceratophyllum demersum	Allozyme	0.064	0.1559	Les	1991	American Journal of Botany 78(8): 1070-1082.
Ceratophyllum echinatum	Allozyme	0.036	0.2343	Les	1991	American Journal of Botany 78(8): 1070-1082.
Cercidiphyllum japonicum	SSR	0.833		Sato	2006	Heredity 96(1): 79-84.
Cereus peruvianus	Allozyme	0.068		Mangolin	1997	Biochemical Genetics 35(5-6): 189-204.
Cereus repandus	Allozyme	0.205	0.242	Nassar	2003	American Journal of Botany 90(11): 1628-1637.
Ceriops australis	ISSR	0.053	0.089	Huang	2008	Genetica 133(1): 47-56.
Ceriops decandra	ISSR	0.028	0.27	Huang	2008	Genetica 133(1): 47-56.
Ceriops tagal	ISSR	0.023	0.118	Huang	2008	Genetica 133(1): 47-56.
Chamaecrista coriacea	Allozyme		0.01	Conceicao	2008	Plant Systematics and Evolution 270(3-4): 183-207.
Chamaecrista cytisoides ‘‘f. prostrata’’	Allozyme	0.034		Conceicao	2008	Plant Systematics and Evolution 270(3-4): 183-207.
Chamaecrista cytisoides var. blanchetii	Allozyme	0.025		Conceicao	2008	Plant Systematics and Evolution 270(3-4): 183-207.
Chamaecrista cytisoides var. brachystachya	Allozyme	0.024		Conceicao	2008	Plant Systematics and Evolution 270(3-4): 183-207.
Chamaecrista cytisoides var. confertiformis	Allozyme	0.044		Conceicao	2008	Plant Systematics and Evolution 270(3-4): 183-207.
Chamaecrista cytisoides var. cytisoides	Allozyme		0.066	Conceicao	2008	Plant Systematics and Evolution 270(3-4): 183-207.
Chamaecrista cytisoides var. decora	Allozyme	0.051		Conceicao	2008	Plant Systematics and Evolution 270(3-4): 183-207.
Chamaecrista cytisoides var. micrantha	Allozyme	0.02		Conceicao	2008	Plant Systematics and Evolution 270(3-4): 183-207.
Chamaecrista cytisoides var. unijuga	Allozyme	0.05		Conceicao	2008	Plant Systematics and Evolution 270(3-4): 183-207.
Chamaecrista depauperata	Allozyme	0.053		Conceicao	2008	Plant Systematics and Evolution 270(3-4): 183-207.
Chamaecyparis obtusa	SSR	0.78		Matsumoto	2010	Journal of Plant Research 123(5): 689-699.
Chamaedaphne calyculata	AFLP	0.087		Wroblewska	2012	Biological Journal of the Linnean Society 105(4): 761-775.
Chamaesyce skottsbergii	RAPD		0.104	Morden	2005	Conservation Genetics 6(6): 969-979.
Changiostyrax dolichocarpa	SSR	0.643		Yao	2007	New Phytologist 176(2): 472-480.
Changium smyrnioides	ISSR	0.11	0.24	Qiu	2004	Biochemical Systematics and Ecology 32(6): 583-596.
Chimaphila japonica	Allozyme	0.256	0.279	Hur	1998	Genes & Genetic Systems 73(5): 275-280.
Chimonanthus nitens	ISSR	0.1571	0.2776	Zhou	2012	Scientia Horticulturae 136: 38-42.
Chinanthus retusus	Allozyme	0.118	0.164	Soejima	1998	Genes & Genetic Systems 73(1): 29-37.
Chrysosplenium tetrandrum	ISSR	0.077	0.084	Levsen	2009	Botany 87(8): 780-790.
Cicer arietinum	SSR		0.869	Upadhyaya	2008	BMC Plant Biology 8: 106.
Cicer bijugum	AFLP		0.07	Shan	2005	Theoretical and Applied Genetics 110(2): 381-391.
Cicer cuneatum	AFLP		0.062	Shan	2005	Theoretical and Applied Genetics 110(2): 381-391.
Cicer echinospermum	AFLP		0.092	Shan	2005	Theoretical and Applied Genetics 110(2): 381-391.
Cicer judaicum	AFLP		0.116	Shan	2005	Theoretical and Applied Genetics 110(2): 381-391.
Cicer pinnatifidum	AFLP		0.092	Shan	2005	Theoretical and Applied Genetics 110(2): 381-391.
Cicer reticulatum	AFLP		0.087	Shan	2005	Theoretical and Applied Genetics 110(2): 381-391.
Cicer yamashitae	AFLP		0.015	Shan	2005	Theoretical and Applied Genetics 110(2): 381-391.
Cinnamomum migao	ISSR	0.1889	0.2228	Chen	2011	Zhongguo Zhong Yao Za Zhi 36(11): 1409-1415.
Cirsium arvense	SSR	0.79		Guggisberg	2012	Journal of Biogeography 39(10): 1919-1931.
Cirsium hillii	SSR	0.494		Freeland	2010	Botany 88(12): 1073-1080.
Cirsium spinosissimum	AFLP	0.1	0.16	Meirmans	2011	Molecular Ecology 20(15): 3144-3155.
Cistus ladanifer	AFLP	0.098		Quintela-Sabaris	2012	Plant and Soil 359(1-2): 397-413.
Cistus salviifolius	Allozyme		0.049	Aparicio	2012	Diversity and Distributions 18(3): 226-235.
Citrullus lanatus	RAPD	0.16		Mujaju	2010	Hereditas 147(4): 142-153.
Citrullus lanatus	SSR	0.31		Mujaju	2010	Hereditas 147(4): 142-153.
Citrus aurantium	RAPD		0.298	Ming	2009	Journal of Integrative Plant Biology 51(1): 100-106.
Clarkia dudleyana	Allozyme	0.296		Podolsky	2001	Conservation Biology 15(2): 412-423.
Clematis acerifolia	Allozyme	0.072		Lopez-Pujol	2008	Biochemical Genetics 46(7-8): 433-445.
Clematis crispa	Allozyme	0.246		Goertzen	2007	Journal of the Torrey Botanical Society 134(4): 433-440.
Clematis socialis	Allozyme	0.302		Goertzen	2007	Journal of the Torrey Botanical Society 134(4): 433-440.
Clidemia hirta	Allozyme	0.052	0.225	Dewalt	2004	American Journal of Botany 91(8): 1155-1163.
Cochlearia polonica	ISSR	0.1283	0.1606	Rucinska	2011	Biodiversity and Conservation 20(2): 401-413.
Cochlearia pyrenaica	AFLP	0.099	0.1557	Cires	2011	Biologia 68(1): 30-40.
Coffea arabica	AFLP		0.23	Maluf	2005	Scientia Agricola 62(4): 366-373.
Coffea arabica	ISSR	0.07	0.37	Aga	2005	Genetica 124(2-3): 213-221.
Coffea arabica	RAPD	0.19		Masumbuko	2003	Hereditas 139(1): 56-63.
Coffea arabica	SSR		0.33	Maluf	2005	Scientia Agricola 62(4): 366-373.
Coffea canephora	AFLP		0.2	Ferrao	2013	Plant Systematics and Evolution 299(1): 225-238.
Coffea canephora	RAPD		0.24	Ferrao	2013	Plant Systematics and Evolution 299(1): 225-238.
Coffea canephora	SSR		0.43	Ferrao	2013	Plant Systematics and Evolution 299(1): 225-238.
Colchicum autumnale	AFLP	0.142	0.305	Smith	2010	Conservation Genetics 11(4): 1351-1361.
Colocasia esculenta	Allozyme		0.3469	Sharma	2008	Plant Biotechnology Reports 2(3): 191-198.
Colocasia esculenta	RAPD		0.31	Sharma	2008	Plant Biotechnology Reports 2(3): 191-198.
Colocasia esculenta	SSR		0.715	Sardos	2012	Genetic Resources and Crop Evolution 59(5): 805-820.
Colubrina oppositifolia	RAPD	0.136	0.183	Kwon	2002	Molecular Ecology 11(6): 991-1001.
Commelina communis	AFLP	0.1833		Ye	2012	BMC Evolutionary Biology 12(1): 84.
Commelina communis	ISSR	0.2008		Ye	2012	BMC Evolutionary Biology 12(1): 84.
Commiphora guillauminii	AFLP	0.066		Voigt	2009	Journal of Biogeography 36(2): 242-254.
Commiphora harveyi	AFLP	0.08		Voigt	2009	Journal of Biogeography 36(2): 242-254.
Commiphora wightii	RAPD	0.0958		Haque	2010	Molecular Biology Reports 37(2): 847-854.
Consolida regalis	RAPD	0.317		Brutting	2012	Biodiversity and Conservation 21(3): 745-761.
Conyza sumatrensis	ISSR	0.385		Ren	2010	Acta Oecologica 36(6): 599-603.
Copaifera langsdorffii	SSR		0.893	Sebbenn	2011	Heredity 106(1): 134-145.
Coptis chinensis (domesticated)	ISSR	0.16	0.204	Shi	2008	Plant Biology 10(4): 485-491.
Coptis chinensis (wild)	ISSR	0.153	0.279	Shi	2008	Plant Biology 10(4): 485-491.
Coptis deltoidea	ISSR	0.1025	0.3247	Zhang	2009	Zhongguo Zhong Yao Za Zhi 34(24): 3176-3179.
Coptis omeiensis	RAPD	0.3184	0.4138	Zhang	2010	Zhongguo Zhong Yao Za Zhi 35(2): 138-141.
Coreopsis grandiflora	RAPD	0.1596	0.2855	Liang	2008	Canadian Journal of Plant Science 88(4): 831-837.
Coreopsis integrifolia	Allozyme	0.117		Cosner	1994	Systematic Botany 19(3): 350-358.
Coreopsis pulchra	Allozyme	0.057		Cosner	1994	Systematic Botany 19(3): 350-358.
Coreopsis rosea	Allozyme	0.093		Cosner	1994	Systematic Botany 19(3): 350-358.
Cornus florida	SSR	0.68		Hadziabdic	2010	Genetica 138(9-10): 1047-1057.
Cornus officinalis	ISSR	0.241	0.293	Li	2012	Genetic Resources and Crop Evolution 59(8): 1659-1671.
Corrigiola litoralis	Allozyme	0.028	0.065	Durka	1999	Heredity 83: 476-484.
Crepis triasii	Allozyme	0.223	0.281	Mayol	2012	Annals of Botany 109(2): 429-441.
Croomia heterosepala	ISSR	0.125	0.239	Li	2008	Molecular Phylogenetics and Evolution 49(3): 702-714.
Croomia japonica	ISSR	0.085	0.3	Li	2008	Molecular Phylogenetics and Evolution 49(3): 702-714.
Croton alabamensis	AFLP	0.1216		Van Ee	2006	Molecular Ecology 15(10): 2735-2751.
Cryptomeria japonica	Allozyme	0.178		Tsumura	1992	Japanese Journal of Genetics 67(4): 299-308.
Cryptomeria japonica	SSR	0.74	0.77	Takahashi	2005	Journal of Plant Research 118(2): 83-90.
Cucumeropsis mannii	Allozyme	0.078	0.12	Koffi	2008	Biochemical Systematics and Ecology 36(10): 777-789.
Cucumis melo	RAPD		0.33	Luan	2008	Euphytica 164(2): 445-461.
Cucurbita pepo	AFLP		0.18	Ferriol	2003	Theoretical and Applied Genetics 107(2): 271-282.
Cunninghamia konishii	AFLP	0.1838		Chung	2004	Molecular Phylogenetics and Evolution 33(3): 791-801.
Cunninghamia lanceolata	AFLP	0.2863		Chung	2004	Molecular Phylogenetics and Evolution 33(3): 791-801.
Cupressus chengiana	ISSR	0.1631	0.312	Hao	2006	Biochemical Genetics 44(1-2): 31-45.
Curcuma longa	ISSR	0.1809	0.2469	Singh	2012	Industrial Crops and Products 37(1): 284-291.
Curcuma longa	RAPD	0.2615	0.3089	Singh	2012	Industrial Crops and Products 37(1): 284-291.
Cuscuta europaea	Allozyme	0.491		Mutikainen	2002	Heredity 89: 318-324.
Cycas debaoensis	ISSR	0.141	0.215	Xie	2005	Australian Journal of Botany 53(2): 141-145.
Cycas guizhouensis	ISSR	0.0597	0.1082	Xiao	2004	Annals of Botany 94(1): 133-138.
Cycas seemannii	Allozyme	0.057	0.138	Keppel	2002	Journal of Heredity 93(2): 133-139.
Cycas taitungensis	Allozyme	0.039		Huang	2004	Botanical Review 70(1): 86-92.
Cyclobalanopsis myrsinaefolia	SSR	0.549	0.578	Liu	2008	Plant Ecology 197(1): 31-41.
Cydonia oblonga	ISSR		0.309	Ganopoulos	2011	Genetics and Molecular Research 10(4): 2729-2746.
Cymbidium goeringii	Allozyme	0.302		Chung	2007	Biological Conservation 137(1): 125-137.
Cymbidium goeringii	ISSR		0.22	Wang	2009	Genetica 136(3): 391-399.
Cymbidium goeringii	SSR		0.5646	Moe	2012	Scientia Horticulturae 134: 157-162.
Cymbidium hybridium	SSR		0.5902	Moe	2012	Scientia Horticulturae 134: 157-162.
Cymbidium sinensis	SSR		0.7971	Moe	2012	Scientia Horticulturae 134: 157-162.
Cymodocea nodosa	SSR	0.406		Alberto	2006	Marine Ecology-Progress Series 309: 117-129.
Cymophyllus fraserianus	Allozyme	0.113	0.131	Godt	2004	Genetica 122(2): 207-215.
Cynara cardunculus	SSR		0.795	Khaldi	2012	Comptes Rendus Biologies 335(6): 389-397.
Cynara cardunculus var. sylvestris	AFLP	0.2		Portis	2005	Plant Science 169(1): 199-210.
Cypripedium calceolus	Allozyme	0.14	0.15	Brzosko	2009	Annales Botanici Fennici 46(3): 201-214.
Cypripedium macranthos var. rebunense	Allozyme	0.183	0.187	Izawa	2007	Conservation Genetics 8(6): 1369-1376.
Cytisus scoparius	SSR	0.646		Rosenmeier	2013	Botanical Journal of the Linnean Society 171(2): 429-440.
Dalbergia monticola	SSR	0.73	0.82	Andrianoelina	2009	Annals of Botany 104(6): 1231-1242.
Dalbergia nigra	SSR	0.735		Resende	2011	Genetica 139(9): 1159-1168.
Dalbergia oliveri	ISSR		0.169	Phong	2011	Genetics and Molecular Research 10(4): 2382-2393.
Dalbergia oliveri	RAPD		0.068	Phong	2011	Genetics and Molecular Research 10(4): 2382-2393.
Dalea purpurea	Allozyme	0.074		Gustafson	2002	International Journal of Plant Sciences 163(6): 979-990.
Daphne laureola	AFLP	0.126		Castilla	2012	Plant Biology 14(3): 515-524.
Daucus carota	AFLP	0.24	0.41	Shim	2000	Theoretical and Applied Genetics 101(1-2): 227-233.
Daucus carota	SSR		0.84	Cavagnaro	2011	BMC Genomics 12: 386.
Davidia involucrata	ISSR	0.2201	0.3296	Luo	2011	Trees-Structure and Function 25(6): 1063-1071.
Daviesia mimosoides	Allozyme	0.41		Young	1998	Heredity 80: 374-381.
Daviesia suaveolens	Allozyme	0.28		Young	1998	Heredity 80: 374-381.
Decodon verticillatus	Allozyme	0.379		Eckert	1993	American Journal of Botany 80(10): 1175-1182.
Delphinium bolosii	Allozyme	0.065		Orellana	2007	Flora 202(2): 161-168.
Delphinium montanum	Allozyme	0.308		Simon	2001	Biological Conservation 98(3): 305-314.
Delphinium pentagynum ssp. formenteranum	Allozyme	0.18	0.172	Lopez-Pujol	2003	Biodiversity and Conservation 12(9): 1937-1951.
Delphinium staphisagria	Allozyme	0.044	0.057	Orellana	2009	Genetica 135(2): 221-232.
Dendrobium officinale	AFLP	0.1477	0.2688	Li	2008	Genetica 133(2): 159-66.
Dendrobium officinale	ISSR	0.2207	0.3367	Ding	2009	Genetika 45(3): 375-382.
Dendrobium officinale	RAPD	0.1874	0.3097	Ding	2009	Genetika 45(3): 375-382.
Dendrobium officinale	SSR	0.70806		Hou	2012	Plant Systematics and Evolution 298(8): 1483-1491.
Dendrocalamus membranaceus	ISSR	0.164	0.219	Yang	2012	International Journal of Molecular Sciences 13(4): 4446-4457.
Desmanthus illinoensis	AFLP	0.013	0.086	DeHanan	2003	Crop Science 43(1): 402-408.
Desmodium triflorum	AFLP	0.23	0.31	Yue	2010	Journal of Plant Biology 53(2): 165-171.
Dianthus broteri	AFLP	0.088		Balao	2010	New Phytologist 187(2): 542-551.
Dianthus carthusianorum	RAPD	0.151	0.172	Wojcik	2013	Chemosphere 90: 1249-1257.
Dillwynia tenuifolia	Allozyme	0.434		Rymer	2002	Austral Ecology 27(3): 241-248.
Dioon angustifolium	Allozyme	0.218		Gonzalez-Astorga	2005	Annals of Botany 95(6): 999-1007.
Dioon caputoi	Allozyme	0.35		Cabrera-Toledo	2008	Botanical Journal of the Linnean Society 158(3): 436-447.
Dioon caputoi	Allozyme	0.358		Cabrera-Toledo	2010	Plant Systematics and Evolution 290(1-4): 115-125.
Dioon merolae	Allozyme	0.446		Cabrera-Toledo	2010	Plant Systematics and Evolution 290(1-4): 115-125.
Dioscorea japonica	SSR		0.71	Mizuki	2010	Evolutionary Ecology 24(6): 1399-1415.
Dioscorea praehensilis	SSR	0.68		Chair	2011	Molecular Ecology 20(8): 1612-1623.
Dioscorea sp.	SSR		0.57	Scarcelli	2011	Genetica 139(8): 1055-1064.
Dipterocarpus grandiflorus	SSR		0.68	Kettle	2011	Perspectives in Plant Ecology Evolution and Systematics 13(1): 45-54.
Dipteronia dyeriana	AFLP	0.2044	0.3047	Yang	2007	Biochemical Systematics and Ecology 35(9): 593-599.
Dipteronia sinensis	AFLP	0.209	0.3319	Yang	2007	Biochemical Systematics and Ecology 35(9): 593-599.
Distemonanthus benthamianus	SSR	0.541		Debout	2011	Heredity 106(1): 88-99.
Draba fladnizensis	AFLP		0.052	Skrede	2009	Heredity 102(3): 293-302.
Draba fladnizensis	SSR		0.332	Skrede	2009	Heredity 102(3): 293-302.
Draba nivalis	AFLP		0.044	Skrede	2009	Heredity 102(3): 293-302.
Draba nivalis	SSR		0.233	Skrede	2009	Heredity 102(3): 293-302.
Draba subcapitata	AFLP		0.042	Skrede	2009	Heredity 102(3): 293-302.
Draba subcapitata	SSR		0.193	Skrede	2009	Heredity 102(3): 293-302.
Dracocephalum austriacum	Allozyme	0.112	0.15	Dostalek	2010	Conservation Genetics 11(3): 773-783.
Dryas octopetala	AFLP	0.11	0.15	Meirmans	2011	Molecular Ecology 20(15): 3144-3155.
Dubautia laxa ssp. bryanii	SSR	0.51		McGlaughlin	2011	Annals of Botany 107(3): 357-370.
Dubautia laxa ssp. hirsuta	SSR	0.26		McGlaughlin	2011	Annals of Botany 107(3): 357-370.
Dubautia laxa ssp. laxa	SSR	0.4		McGlaughlin	2011	Annals of Botany 107(3): 357-370.
Dubautia laxa ssp. pseudoplantaginea	SSR		0.41	McGlaughlin	2011	Annals of Botany 107(3): 357-370.
Dyckia ibiramensis	Allozyme	0.098	0.219	Hmeljevski	2011	Conservation Genetics 12(3): 761-769.
Dysosma pleiantha	ISSR	0.111	0.208	Zong	2008	Biochemical Genetics 46(3-4): 180-196.
Dysosma versipellis	AFLP	0.083	0.211	Guan	2010	American Journal of Botany 97(1): 111-122.
Dysosma versipellis	ISSR	0.082	0.207	Qiu	2006	Biochemical Systematics and Ecology 34(10): 745-752.
Echinacea atrorubens	AFLP		0.3831	Mechanda	2004	Canadian Journal of Botany 82(4): 461-484.
Echinacea laevigata	AFLP	0.1872	0.2611	Peters	2009	Conservation Genetics 10(1): 1-14.
Echinacea pallida	AFLP		0.3703	Mechanda	2004	Canadian Journal of Botany 82(4): 461-484.
Echinacea purpurea	AFLP		0.4627	Mechanda	2004	Canadian Journal of Botany 82(4): 461-484.
Echinosophora koreensis	ISSR	0.204		Chung	2006	Annals of Botany 98(1): 165-173.
Echinospartum algibicum	Allozyme	0.204		Aparicio	2002	Plant Systematics and Evolution 230(3-4): 189-201.
Echinospartum barnadesii	Allozyme		0.283	Aparicio	2002	Plant Systematics and Evolution 230(3-4): 189-201.
Echinospartum boissieri	Allozyme		0.218	Aparicio	2002	Plant Systematics and Evolution 230(3-4): 189-201.
Echinospartum ibericum	Allozyme	0.217	0.253	Aparicio	2002	Plant Systematics and Evolution 230(3-4): 189-201.
Edraianthus serpyllifolius	AFLP	0.153		Surina	2011	Journal of Biogeography 38(7): 1381-1393.
Edraianthus tenuifolius	AFLP	0.118		Surina	2011	Journal of Biogeography 38(7): 1381-1393.
Eichhornia crassipes	RAPD	0.046		Ren	2005	Weed Research 45(3): 236-244.
Eichhornia paniculata	Allozyme	0.022		Husband	1991	Heredity 66: 287-296.
Elaeagnus mollis	SSR	0.69	0.71	Wang	2012	Biochemical Systematics and Ecology 40: 25-33.
Elaeis guineensis	Allozyme	0.184		Hayati	2004	Theoretical and Applied Genetics 108(7): 1274-1284.
Elaeis guineensis	SSR	0.462		Abdullah	2011	Comptes Rendus Biologies 334(4): 290-9.
Eleusine coracana	RAPD		0.28	Panwar	2010	Molecular Biology Reports 37(8): 4075-4082.
Elliottia racemosa	Allozyme	0.063	0.091	Godt	1999	Molecular Ecology 8(1): 75-82.
Elodea canadensis	SSR	0.28		Huotari	2011	Plant Systematics and Evolution 294(1-2): 27-37.
Elymus alaskanus	Allozyme	0.005	0.135	Diaz	1999	Theoretical and Applied Genetics 99(1-2): 210-217.
Elymus caninus	Allozyme	0.027	0.22	Sun	2001	Plant Systematics and Evolution 227(3-4): 235-244.
Elymus caninus	SSR	0.117	0.56	Sun	2001	Plant Systematics and Evolution 227(3-4): 235-244.
Elymus fibrosus	Allozyme	0.008	0.025	Diaz	2000	Genetic Resources and Crop Evolution 47(1): 11-24.
Elymus fibrosus	RAPD	0.08	0.22	Diaz	2000	Genetic Resources and Crop Evolution 47(1): 11-24.
Elymus fibrosus	SSR	0.252	0.548	Sun	1998	Hereditas 129(3): 275-282.
Embothrium coccineum	Allozyme	0.17	0.215	Souto	2007	Australian Journal of Botany 55(8): 809-817.
Emmenopterys henryi	ISSR	0.071	0.191	Li	2008	Genetica 133(3): 227-234.
Encephalartos latifrons	AFLP		0.1387	Da silva	2012	Biological Journal of the Linnean Society 105(2): 293-308.
Epidendrum fulgens	SSR	0.678		Pinheiro	2011	Journal of Biogeography 38(10): 1923-1935.
Epilobium fleischeri	RAPD	0.19		Kuss	2008	Journal of Plant Ecology 1(3): 149-159.
Epimedium pubescens	Allozyme	0.278	0.282	Xu	2007	Journal of Genetics and Genomics 34(1): 56-71.
Epimedium sagittatum	Allozyme	0.361	0.369	Xu	2007	Journal of Genetics and Genomics 34(1): 56-71.
Epimedium wushanense	Allozyme	0.286	0.294	Xu	2007	Journal of Genetics and Genomics 34(1): 56-71.
Epipactis helleborine	Allozyme	0.231	0.294	Squirrell	2001	American Journal of Botany 88(8): 1409-1418.
Eragrostis tef	SSR		0.58	Zeid	2012	Field Crops Research 127: 64-70.
Eriastrum densifolium	RAPD	0.285	0.323	Brunell	1997	Systematic Botany 22(3): 543-553.
Erica coccinea	SSR	0.72		Segarra-Moragues	2010	Evolution 64(12): 3511-3524.
Erigeron ovalifolium var. vineum	Allozyme	0.19	0.2	Neel	2003	Conservation Genetics 4(3): 337-352.
Erigeron parishii	Allozyme	0.17	0.19	Neel	2001	American Journal of Botany 88(5): 810-818.
Erodium antariense	AFLP		0.169	Alarcon	2012	Molecular Phylogenetics and Evolution 63(3): 866-876.
Erodium foetidum	AFLP	0.171		Alarcon	2012	Molecular Phylogenetics and Evolution 63(3): 866-876.
Erodium glandulosum	AFLP	0.166		Alarcon	2012	Molecular Phylogenetics and Evolution 63(3): 866-876.
Erodium lucidum	AFLP	0.131		Alarcon	2012	Molecular Phylogenetics and Evolution 63(3): 866-876.
Erodium paularense	AFLP	0.108		Alarcon	2012	Molecular Phylogenetics and Evolution 63(3): 866-876.
Erodium rodiei	AFLP		0.136	Alarcon	2012	Molecular Phylogenetics and Evolution 63(3): 866-876.
Erodium rupestre	Allozyme	0.025		Lopez-Pujol	2006	Biochemical Systematics and Ecology 34(3): 219-230.
Erophaca baetica ssp. baetica	AFLP	0.12		Casimiro-Soriguer	2010	Molecular Phylogenetics and Evolution 56(1): 441-450.
Eryngium alpinum	AFLP	0.2		Gaudeul	2004	Heredity 92(6): 508-18.
Eryngium alpinum	SSR	0.405		Gaudeul	2004	Heredity 92(6): 508-518.
Eryngium campestre	AFLP	0.19		Bylebyl	2008	Molecular Ecology 17(14): 3379-3388.
Eryngium cuneifolium	Allozyme	0.086	0.104	McDonald	1996	American Journal of Botany 83(1): 21-27.
Eryngium maritimum	AFLP	0.142		Westberg	2009	Journal of Biogeography 36(7): 1398-1410.
Erythronium montanum	Allozyme	0.081	0.109	Allen	1996	Canadian Journal of Botany 74(3): 403-412.
Erythroxylum havanense	RAPD	0.431		Dominguez	2005	New Phytologist 166(2): 663-672.
Erythroxylum pusillum	SSR	0.6		van der Merwe	2010	New Phytologist 188(3): 868-878.
Eucalyptus aggregata	SSR	0.668		Field	2011	Heredity 106(5): 841-853.
Eucalyptus camaldulensis	ISSR		0.1118	Balasaravanan	2005	Tree Physiology 25(10): 1295-1302.
Eucalyptus camaldulensis	SSR		0.86	Arumugasundaram	2011	Plos One 6(12): e28252.
Eucalyptus citriodora	ISSR		0.0637	Balasaravanan	2005	Tree Physiology 25(10): 1295-1302.
Eucalyptus dunnii	AFLP		0.33	Marcucci Poltri	2003	Tree Physiology 23(9): 625-632.
Eucalyptus globulus	SSR	0.78		Mimura	2009	Molecular Ecology 18(20): 4180-4192.
Eucalyptus grandis	ISSR		0.0803	Balasaravanan	2005	Tree Physiology 25(10): 1295-1302.
Eucalyptus obliqua	SSR	0.8	0.83	Bloomfield	2011	Australian Journal of Botany 59(3): 226-237.
Eucalyptus pellita	Allozyme	0.1978	0.24858	House	1996	Australian Journal of Botany 44(2): 157-174.
Eucalyptus pellita	ISSR		0.0786	Balasaravanan	2005	Tree Physiology 25(10): 1295-1302.
Eucalyptus rubida	SSR	0.774		Field	2011	Heredity 106(5): 841-853.
Eucalyptus scias	Allozyme	0.24579	0.29472	House	1996	Australian Journal of Botany 44(2): 157-174.
Eucalyptus tereticornis	ISSR		0.1246	Balasaravanan	2005	Tree Physiology 25(10): 1295-1302.
Eucalyptus tereticornis	SSR		0.85	Arumugasundaram	2011	Plos One 6(12): e28252.
Eucalyptus urophylla	ISSR		0.0941	Balasaravanan	2005	Tree Physiology 25(10): 1295-1302.
Eucommia ulmoides	AFLP	0.157		Yao	2012	Conservation Genetics 13(6): 1499-1507.
Eugenia dysenterica	SSR	0.442		Zucchi	2003	Genetics and Molecular Biology 26(4): 449-457.
Eulophia sinensis	Allozyme	0.00012	0.00012	Sun	2001	American Journal of Botany 88(12): 2180-2188.
Eulophia sinensis	RAPD	0.07	0.202	Sun	2001	American Journal of Botany 88(12): 2180-2188.
Eupatorium adenophorum	AFLP	0.127	0.188	Huang	2009	Canadian Journal of Plant Science 89(1): 119-126.
Euphrasia stricta	AFLP		0.17	Kolseth	2005	Ecography 28(4): 443-452.
Euptelea pleiospermum	SSR	0.621		Wei	2012	New Phytologist 193(3): 779-786.
Eurya emarginata	Allozyme	0.296	0.321	Chung	1995	Japanese Journal of Genetics 70(3): 387-398.
Eurya nitida	ISSR		0.182	Deshpande	2001	Molecular Ecology 10(10): 2397-2408.
Euryale ferox	Allozyme		0.038	Koren	2012	Russian Journal of Genetics 48(9): 912-919.
Eurycorymbus cavaleriei	SSR	0.732		Wang	2010	Forest Ecology and Management 260(12): 2180-2188.
Euryodendron excelsum	ISSR		0.3642	Su	2009	Biochemical Genetics 47(1-2): 56-65.
Euterpe edulis	AFLP	0.119		Cardoso	2000	Molecular Ecology 9(11): 1753-1760.
Euterpe edulis	Allozyme	0.278		Conte	2003	Heredity 91(4): 401-406.
Fagopyrum cymosum	RAPD	0.302	0.3608	Zhang	2009	Zhongguo Zhong Yao Za Zhi 34(6): 660-663.
Fagopyrum esculentum	AFLP	0.303		Iwata	2005	Genome 48(3): 367-77.
Fagopyrum esculentum	Allozyme	0.15		Ohnishi	1993	Japanese Journal of Genetics 68(4): 317-326.
Fagopyrum esculentum	SSR	0.819		Iwata	2005	Genome 48(3): 367-377.
Fagus sylvatica	AFLP	0.231		Pluess	2012	Plos One 7(3): e33636.
Fagus sylvatica	Allozyme	0.19		Leonardi	2012	Journal of Heredity 103(3): 408-417.
Fagus sylvatica	SSR	0.758		Piotti	2012	Heredity 108(3): 322-331.
Fallopia japonica	SSR	0.366		Grimsby	2007	American Journal of Botany 94(6): 957-964.
Ferula loscosii	Allozyme	0.125	0.152	Perez-Collazos	2008	Plant Biology 10(4): 492-501.
Festuca idahoensis	ISSR		0.263	Liston	2003	Oecologia 137(2): 216-225.
Festuca pratensis	AFLP	0.1268		Fjellheim	2005	Theoretical and Applied Genetics 111(4): 640-650.
Festuca pratensis	RAPD	0.093		Fedorenko	2009	Russian Journal of Genetics 45(9): 1134-1138.
Ficus carica	SSR	0.482	0.516	Aradhya	2010	Genetica 138(6): 681-694.
Ficus pumila	SSR	0.43		Chen	2008	Symbiosis 45(1-3): 37-44.
Flaveria bidentis	ISSR	0.1815	0.4153	Ma	2010	Weed Research 51(4): 363-372.
Flourensia cernua	Allozyme	0.39		Ferrer	2004	Annals of Botany 94(3): 419-426.
Fragaria virginiana	SSR		0.852	Ashley	2003	Theoretical and Applied Genetics 107(7): 1201-1207.
Fraxinus excelsior	SSR	0.818		Sutherland	2010	Molecular Ecology 19(11): 2196-2211.
Fraxinus lanuginosa	Allozyme	0.287		Ishida	2002	Heredity 88: 296-301.
Fraxinus mandshurica	SSR	0.564		Hu	2008	Annals of Botany 102(2): 195-205.
Fraxinus ornus	SSR		0.6506	Verdu	2006	Evolution 60(10): 2056-2063.
Fritillaria anhuiensis	ISSR		0.0867	Li	2011	Biochemical Systematics and Ecology 39(4-6): 725-731.
Fritillaria cirrhosa	AFLP	0.2704	0.3709	Zhang	2010	Biochemical Systematics and Ecology 38(2): 236-242.
Fritillaria cirrhosa	ISSR		0.1182	Li	2011	Biochemical Systematics and Ecology 39(4-6): 725-731.
Fritillaria imperialis	AFLP	0.16	0.25	Badfar-Chaleshtori	2012	Biochemical Systematics and Ecology 42: 35-48.
Fritillaria imperialis	ISSR	0.14	0.19	Badfar-Chaleshtori	2012	Biochemical Systematics and Ecology 42: 35-48.
Fritillaria imperialis	RAPD	0.13	0.23	Badfar-Chaleshtori	2012	Biochemical Systematics and Ecology 42: 35-48.
Fritillaria thunbergii	ISSR	0.14	0.2433	Li	2011	Biochemical Systematics and Ecology 39(4-6): 725-731.
Galium catalinense ssp. acrispum	SSR	0.495	0.55	Riley	2010	Conservation Genetics 11(5): 2015-2025.
Gastrodia elata	Allozyme	0.173	0.221	Chen	2011	Biochemical Systematics and Ecology 39(4-6): 526-535.
Gaultheria fragrantissima	ISSR	0.293	0.505	Apte	2006	Current Science 91(12): 1634-1640.
Gentiana alpina	AFLP	0.175		Kropf	2006	New Phytologist 172(1): 169-184.
Gentiana nivalis	AFLP	0.07	0.19	Meirmans	2011	Molecular Ecology 20(15): 3144-3155.
Gentiana straminea	RAPD	0.183		Li	2008	Belgian Journal of Botany 141(1): 95-102.
Gentianella aspera	AFLP	0.142		Stadler	2010	Plant Systematics and Evolution 286(1-2): 7-19.
Geranium pratense	AFLP	0.156		Michalski	2012	Conservation Genetics 13(2): 581-592.
Geum montanum	AFLP	0.07	0.12	Meirmans	2011	Molecular Ecology 20(15): 3144-3155.
Geum reptans	AFLP	0.09	0.17	Meirmans	2011	Molecular Ecology 20(15): 3144-3155.
Geum reptans	RAPD	0.21		Kuss	2008	Journal of Plant Ecology 1(3): 149-159.
Geum urbanum	SSR	0.23		Schmidt	2009	Flora 204(7): 549-559.
Ginkgo biloba	AFLP	0.08		Gong	2008	Molecular Phylogenetics and Evolution 48(3): 1094-1105.
Ginkgo biloba	ISSR	0.1986	0.2408	Ge	2003	Biodiversity Science 11: 276-287.
Ginkgo biloba	RAPD	0.3159	0.3773	Fan	2004	Biochemical Genetics 42(7-8): 269-278.
Glandora oleifolia	Allozyme	0.049	0.089	del Hoyo	2012	Plant Ecology & Diversity 5(4): 501-511.
Glandora oleifolia	RAPD	0.11	0.11	del Hoyo	2012	Plant Ecology & Diversity 5(4): 501-511.
Glycine max	AFLP		0.255	Giancola	2002	Euphytica 127(1): 95-113.
Glycine max	Allozyme		0.198	Griffin	1995	Crop Science 35(3): 897-904.
Glycine max	RAPD		0.385	Giancola	2002	Euphytica 127(1): 95-113.
Glycine max	SSR	0.705	0.782	Abe	2003	Ecological Research 21(5): 732-740.
Glycine soja	AFLP		0.353	Zhao	2006	Chinese Science Bulletin 51(10): 1219-1227.
Glycine soja	Allozyme	0.197	0.218	Fujita	1997	Journal of Heredity 88(2): 124-128.
Glycine soja	ISSR		0.226	Zhao	2006	Chinese Science Bulletin 51(10): 1219-1227.
Glycine soja	RAPD		0.285	Xu	2003	Plant Breeding 122(6): 503-506.
Glycine soja	SSR	0.364	0.813	Guo	2012	Annals of Botany 110(4): 777-785.
Glycyrrhiza uralensis	ISSR	0.215	0.268	Yao	2008	Biologia Plantarum 52(1): 117-120.
Glyptostrobus pensilis	ISSR	0.1159	0.1926	Wu	2011	Ying Yong Sheng Tai Xue Bao 22(4): 873-879.
Goodyera procera	Allozyme	0.073	0.15	Wong	1999	American Journal of Botany 86(10): 1406-1413.
Goodyera procera	RAPD	0.181	0.293	Wong	1999	American Journal of Botany 86(10): 1406-1413.
Gossypium barbadense	SSR	0.1		Wang	2011	Genetics and Molecular Research 10(4): 3620-3631.
Grevillea caleyi	AFLP	0.183		Llorens	2004	Heredity 92(6): 519-526.
Grevillea macleayana	SSR	0.498		England	2002	Molecular Ecology 11(6): 967-977.
Grevillea repens	SSR	0.577		Holmes	2009	Conservation Genetics 10(4): 827-837.
Guaiacum sanctum	Allozyme	0.301	0.329	Fuchs	2010	Journal of Heredity 101(3): 284-291.
Guarea guidonia	Allozyme	0.24		Ramos	2010	Biochemical Genetics 48(3-4): 215-228.
Guarea guidonia	SSR	0.26		Ramos	2010	Biochemical Genetics 48(3-4): 215-228.
Guizotia abyssinica	ISSR	0.3738	0.4115	Petros	2007	Hereditas 144(1): 18-24.
Guizotia arborescens	AFLP	0.24	0.37	Geleta	2007	Hereditas 144(2): 53-62.
Guizotia arborescens	RAPD	0.15	0.28	Geleta	2007	Hereditas 144(2): 53-62.
Guizotia scabra ssp. scabra	AFLP	0.24	0.32	Geleta	2007	Hereditas 144(2): 53-62.
Guizotia scabra ssp. scabra	RAPD	0.17	0.23	Geleta	2007	Hereditas 144(2): 53-62.
Guizotia scabra ssp. schimperi	AFLP	0.24	0.32	Geleta	2007	Hereditas 144(2): 53-62.
Guizotia scabra ssp. schimperi	RAPD	0.17	0.22	Geleta	2007	Hereditas 144(2): 53-62.
Guizotia villosa	AFLP	0.24	0.33	Geleta	2007	Hereditas 144(2): 53-62.
Guizotia villosa	RAPD	0.19	0.23	Geleta	2007	Hereditas 144(2): 53-62.
Guizotia zavattarii	AFLP	0.17	0.37	Geleta	2007	Hereditas 144(2): 53-62.
Guizotia zavattarii	RAPD	0.17	0.28	Geleta	2007	Hereditas 144(2): 53-62.
Gymnadenia conopsea	SSR	0.73		Gustafsson	2000	Molecular Ecology 9(11): 1863-1872.
Gymnadenia odoratissima	SSR	0.52		Gustafsson	2002	Conservation Genetics 3(3): 225-234.
Gynostemma pentaphyllum	ISSR	0.0257	0.2624	Wang	2008	Biochemical Systematics and Ecology 36(9): 699-705.
Gypsophila fastigiata	Allozyme	0.309	0.316	Lonn	1996	Oecologia 106(3): 308-316.
Gypsophila repens	AFLP	0.1	0.14	Meirmans	2011	Molecular Ecology 20(15): 3144-3155.
Hagenia abyssinica	AFLP	0.195		Ayele	2011	Journal for Nature Conservation 19(1): 8-17.
Hagenia abyssinica	ISSR	0.3	0.4	Feyissa	2007	Genetic Resources and Crop Evolution 54(5): 947-958.
Halodule wrightii	RAPD	0.1098		Angel	2002	Aquatic Botany 74(2): 165-174.
Hanabusaya asiatica	Allozyme	0.182	0.217	Chung	2001	Plant Biology 3(1): 42-49.
Haplostachys haplostachya	RAPD	0.151	0.166	Morden	1999	Molecular Ecology 8(4): 617-625.
Hardenbergia violacea	AFLP	0.12	0.17	Larcombe	2011	Journal of Biogeography 38(1): 125-136.
Hedychium spicatum	Allozyme	0.37		Jugran	2011	Biochemical Genetics 49(11-12): 806-818.
Hedyotis chrysotricha	SSR	0.416		Yuan	2012	American Journal of Botany 99(10): 1715-1725.
Hedyotis strigulosa var. coreana	Allozyme	0.008		Maki	2008	Biological Journal of the Linnean Society 93(4): 679-688.
Hedyotis strigulosa var. luxurians	Allozyme	0.022		Maki	2008	Biological Journal of the Linnean Society 93(4): 679-688.
Hedyotis strigulosa var. parviflora	Allozyme	0.06		Maki	2008	Biological Journal of the Linnean Society 93(4): 679-688.
Hedysarum coronarium	ISSR		0.18	Ruisi	2011	Genetic Resources and Crop Evolution 58(2): 245-257.
Hedysarum hedysaroides	AFLP	0.13	0.29	Meirmans	2011	Molecular Ecology 20(15): 3144-3155.
Hedysarum laeve	Allozyme	0.101	0.102	Ge	1999	Acta Botanica Sinica 41(3): 301-306.
Hedysarum pogonocarpum ssp. haradjianii	Allozyme	0.312		Caliskan	2006	Biochemical Systematics and Ecology 34(2): 119-126.
Hedysarum pogonocarpum ssp. pogonocarpum	Allozyme	0.298		Caliskan	2006	Biochemical Systematics and Ecology 34(2): 119-126.
Hedysarum spinosissimum ssp. capitaturn	Allozyme	0.102		Baatoot	1991	Genome 34(3): 396-406.
Hedysarum spinosissimum ssp. euspinosissirnurn	Allozyme	0.06		Baatoot	1991	Genome 34(3): 396-406.
Helianthus annuus (domesticated)	Allozyme		0.13	Cronn	1997	Theoretical and Applied Genetics 95(4): 532-545.
Helianthus annuus (domesticated)	SSR		0.568	Tang	2003	Theoretical and Applied Genetics 106(6): 990-1003.
Helianthus annuus (wild)	Allozyme		0.21	Cronn	1997	Theoretical and Applied Genetics 95(4): 532-545.
Helianthus annuus (wild)	SSR		0.74	Tang	2003	Theoretical and Applied Genetics 106(6): 990-1003.
Helianthus petiolaris	Allozyme		0.25	Cronn	1997	Theoretical and Applied Genetics 95(4): 532-545.
Helianthus petiolaris	SSR	0.732		Yatabe	2007	Genetics 175(4): 1883-1893.
Helmholtzia glaberrima	AFLP	0.25		Prentis	2008	Freshwater Biology 53(5): 973-980.
Heloniopsis orientalis	SSR	0.773		Morinaga	2003	American Journal of Botany 90(8): 1153-1158.
Hemarthria compressa	ISSR	0.117	0.228	Huang	2008	Hereditas 145(2): 84-91.
Hemerocallis thunbergii	Allozyme	0.281		Chung	2007	Molecular Ecology 16(13): 2816-2829.
Hemigenia exilis	RAPD	0.311	0.378	Mattner	2002	Biological Conservation 107(1): 37-45.
Heptacodium miconioides	ISSR	0.088	0.2469	Jin	2007	Forest Ecology and Management 245(1-3): 130-136.
Heptacodium miconioides	RAPD	0.2027	0.2954	Lu	2006	Genetica 128(1-3): 409-417.
Heracleum mantegazzianum	SSR	0.364	0.561	Henry	2009	Molecular Ecology 18(13): 2819-2831.
Heritiera littoralis	AFLP	0.14	0.2	Jian	2010	Biochemical Systematics and Ecology 38(5): 924-930.
Heritiera littoralis	ISSR	0.15	0.22	Jian	2010	Biochemical Systematics and Ecology 38(5): 924-930.
Hevea brasiliensis	RAPD	0.2		Lam	2009	Molecular Biotechnology 42(3): 292-298.
Hibiscus glaber	SSR		0.602	Takayama	2008	Molecular Ecology 17(11): 2730-2742.
Hibiscus hamabo	SSR		0.243	Takayama	2008	Molecular Ecology 17(11): 2730-2742.
Hibiscus pernambucensis	SSR		0.359	Takayama	2008	Molecular Ecology 17(11): 2730-2742.
Hibiscus tiliaceus	AFLP	0.199	0.243	Tang	2003	Biochemical Genetics 44(9-10): 449-461.
Hibiscus tiliaceus	SSR		0.615	Takayama	2008	Molecular Ecology 17(11): 2730-2742.
Himantoglossum hircinum	AFLP	0.153		Pfeifer	2009	Journal of Biogeography 36(12): 2353-2365.
Hippocrepis valentina	Allozyme	0.085	0.103	Gonzalez-Candelas	2000	Journal of Heredity 91(2): 134-141.
Hippophae rhamnoides ssp. gyantsensis	ISSR		0.1372	Tian	2004	Biochemical Genetics 42(7-8): 259-267.
Hippophae rhamnoides ssp. rhamnoides	RAPD	0.159		Bartish	1999	Molecular Ecology 8(5): 791-802.
Hippophae rhamnoides ssp. sinensis	ISSR	0.091	0.207	Wang	2011	Plant Systematics and Evolution 295(1-4): 97-107.
Hippophae rhamnoides ssp. sinensis	RAPD	0.168		Sun	2006	Biochemical Genetics 44(5-6): 186-197.
Hippophae rhamnoides ssp. yunnanensis	ISSR	0.1994		Tian	2004	Biochemical Genetics 42(7-8): 259-267.
Hippophae rhamnoides ssp. yunnanensis	RAPD	0.139	0.255	Chen	2010	Biochemical Genetics 48(7-8): 565-576.
Hordeum spontaneum	AFLP	0.16	0.24	Turpeinen	2003	Theoretical and Applied Genetics 106(7): 1333-1339.
Hordeum spontaneum	Allozyme	0.093	0.15	Volis	2002	Evolution 56(7): 1403-1415.
Hordeum spontaneum	SSR	0.512	0.74	Baek	2003	Theoretical and Applied Genetics 106(3): 397-410.
Hordeum vulgare	Allozyme	0.18		Jana	1988	Genetics 119(4): 981-990.
Hordeum vulgare	RAPD	0.32	0.35	Papa	1998	Plant Breeding 117(6): 523-530.
Hordeum vulgare	SSR		0.74	Malysheva-Otto	2006	BMC Genetics 7: 6.
Hornungia alpina	AFLP	0.07	0.15	Meirmans	2011	Molecular Ecology 20(15): 3144-3155.
Hosta jonesii (ramet)	Allozyme	0.267		Chung	2005	Annals of Botany 96(2): 279-288.
Howellia aquatilis	AFLP	0.2737	0.3952	Schierenbeck	2010	Genetica 138(11-12): 1161-1169.
Humboldtia brunonis	ISSR	0.0846	0.1186	Dev	2010	Journal of Biosciences 35(2): 267-279.
Humulus lupulus	SSR		0.679	Jakse	2001	Genome 44(5): 773-782.
Hymenocallis coronaria	SSR	0.279		Markwith	2007	Conservation Genetics 8(4): 949-963.
Hymenoxys herbacea	Allozyme	0.13		Campbell	2007	New Phytologist 174(4): 915-925.
Hypericum nummularium	AFLP	0.24		Gaudeul	2006	Biological Journal of the Linnean Society 87(3): 437-447.
Hypericum perforatum	RAPD	0.229	0.342	Pilepic	2008	Periodicum Biologorum 110(4): 361-365.
Hypochaeris radicata	SSR	0.88		Mix	2006	Molecular Ecology 15(7): 1749-1758.
Hypochaeris uniflora	AFLP	0.09	0.13	Meirmans	2011	Molecular Ecology 20(15): 3144-3155.
Hypopitys monotropa	SSR	0.521		Beatty	2011	Annals of Botany 107(4): 663-670.
Imperata cylindrica	AFLP	0.11		Capo-chichi	2008	Invasive Plant Science and Management 1(2): 133-141.
Incarvillea younghusbandii	AFLP	0.063	0.174	Zhu	2009	Biochemical Systematics and Ecology 37(5): 589-596.
Iris aphylla	AFLP	0.105		Wroblewska	2008	Plant Systematics and Evolution 272(1-4): 49-65.
Iris aphylla	RAPD	0.097		Wroblewska	2006	Botanical Journal of the Linnean Society 152(2): 245-255.
Iris atrofusca	RAPD	0.259		Arafeh	2002	Molecular Ecology 11(1): 39-53.
Iris cristata	Allozyme	0.199	0.231	Hannan	2000	American Journal of Botany 87(3): 293-301.
Iris haynei	RAPD	0.255		Arafeh	2002	Molecular Ecology 11(1): 39-53.
Jatropha curcas	AFLP	0.07	0.15	Shen	2012	Biomass & Bioenergy 37: 265-274.
Jatropha curcas	ISSR	0.138	0.19	Cai	2010	Biomass & Bioenergy 34(12): 1739-1750.
Jatropha curcas	RAPD	0.1895	0.2559	Rafii	2012	Molecular Biology Reports 39(6): 6505-6511.
Juglans mandshurica	SSR		0.719	Bai	2007	New Phytologist 176(3): 699-707.
Juglans sinensis	Allozyme	0.088		Lee	1997	Silvae Genetica 46(2-3): 102-107.
Juncus atratus	SSR	0.576		Michalski	2007	Molecular Ecology 16(22): 4715-4727.
Juncus trifidus	AFLP	0.11	0.17	Meirmans	2011	Molecular Ecology 20(15): 3144-3155.
Juniperus brevifolia	ISSR	0.2	0.36	Silva	2011	Biochemical Genetics 49(11-12): 715-734.
Juniperus brevifolia	RAPD	0.2	0.34	Silva	2011	Biochemical Genetics 49(11-12): 715-734.
Juniperus communis	AFLP	0.361	0.391	Vanden-Broeck	2011	BMC Genetics 12: 73.
Juniperus communis	SSR	0.602		Provan	2008	Conservation Genetics 9(6): 1521-1532.
Juniperus coreana	Allozyme	0.176	0.199	Huh	2000	Evolutionary Ecology 14(2): 87-98.
Juniperus phoenicea	ISSR	0.13	0.148	Meloni	2006	Annals of Botany 97(2): 299-304.
Juniperus phoenicea	RAPD	0.177	0.184	Dzialuk	2011	Annals of Forest Science 68(8): 1341-1350.
Juniperus przewalskii	SSR		0.64	Zhang	2008	Conservation Genetics 9(3): 767-769.
Juniperus tibetica	SSR		0.71	Opgenoorth	2009	Conservation Genetics Resources 1(1): 253-255.
Kandelia candel	Allozyme	0.033	0.0362	Sun	1998	American Journal of Botany 85(11): 1631-1637.
Kandelia candel	SSR		0.738	Geng	2008	Molecular Ecology 17(21): 4724-4739.
Kernera saxatilis	AFLP	0.101		Kropf	2006	New Phytologist 172(1): 169-184.
Kirengeshoma palmata	Allozyme	0.22	0.361	Chang	2007	Journal of Plant Research 120(1): 149-156.
Kmeria septentrionalis	AFLP	0.215	0.249	Zhao	2010	Genetica 138(9-10): 939-44.
Krascheninnikovia ceratoides	ISSR	0.415	0.448	Perez-Collazos	2007	Biological Journal of the Linnean Society 92(3): 419-429.
Lactuca serriola	AFLP	0.067	0.184	Kuang	2008	Genetics 178(3): 1547-58.
Lactuca serriola	SSR		0.42	Alexander	2009	Diversity and Distributions 15(3): 502-512.
Laelia rubescens	Allozyme	0.135	0.174	Trapnell	2004	Molecular Ecology 13(9): 2655-2666.
Laelia speciosa	Allozyme	0.382		Avila-Diaz	2007	American Journal of Botany 94(2): 184-193.
Lagarostrobos franklinii	Allozyme	0.169		Shapcott	1997	Biological Conservation 80(2): 169-179.
Lambertia orbifolia	Allozyme	0.11		Coates	1999	Heredity 83: 418-427.
Lamiophlomis rotata	ISSR	0.166	0.291	Liu	2006	Genetica 128(1-3): 385-394.
Lamiophlomis rotata	RAPD	0.166	0.287	Liu	2006	Genetica 128(1-3): 385-394.
Larix decidua	Allozyme	0.157	0.163	Lewandowski	1991	Hereditas 115(3): 221-226.
Larix decidua	SSR		0.739	Wagner	2012	Molecular Ecology Resources 12(4): 717-725.
Larix kaempferi	SSR	0.742		Nishimura	2011	Journal of Plant Research 124(2): 253-263.
Larix lyallii	SSR	0.418		Khasa	2006	Molecular Ecology 15(13): 3907-3918.
Larix occidentalis	SSR	0.58		Khasa	2006	Molecular Ecology 15(13): 3907-3918.
Larix potaninii var. chinensis	SSR	0.6093	0.6748	Yu	2006	Biochemical Genetics 44(11-12): 491-501.
Lasthenia conjugens	ISSR	0.207	0.243	Neale	2008	Plant Species Biology 23(2): 97-110.
Lathyrus vernus	Allozyme	0.28	0.354	Schiemann	2000	Plant Systematics and Evolution 225(1-4): 119-132.
Leavenworthia alabamica	Allozyme	0.439	0.561	Charlesworth	1998	Heredity 81: 453-461.
Leavenworthia crassa	Allozyme	0.281	0.424	Charlesworth	1998	Heredity 81: 453-461.
Leavenworthia stylosa	Allozyme	0.486	0.524	Charlesworth	1998	Heredity 81: 453-461.
Leersia hexandra	ISSR	0.154	0.261	Song	2006	Aquatic Botany 84(4): 359-362.
Lemurophoenix halleuxii	SSR	0.275		Shapcott	2012	Conservation Genetics 13(5): 1393-1408.
Lens culinaris ssp. culinaris (domesticated)	Allozyme		0.161	Ferguson	1996	Euphytica 91(2): 163-172.
Lens culinaris ssp. culinaris (domesticated)	SSR		0.65	Hamwieh	2009	Breeding Science 59(1): 77-86.
Lens culinaris ssp. orientalis	RAPD		0.049	Ferguson	1998	Genetic Resources and Crop Evolution 45(6): 549-559.
Lens culinaris ssp. orientalis (wild)	Allozyme		0.234	Ferguson	1996	Euphytica 91(2): 163-172.
Lens culinaris ssp. orientalis (wild)	SSR		0.73	Hamwieh	2009	Breeding Science 59(1): 77-86.
Lens ervoides	Allozyme		0.107	Ferguson	1996	Euphytica 91(2): 163-172.
Lens ervoides	RAPD		0.006	Ferguson	1998	Genetic Resources and Crop Evolution 45(6): 549-559.
Lens lamottei	Allozyme		0.005	Ferguson	1998	Genetic Resources and Crop Evolution 45(6): 549-559.
Lens lamottei	RAPD		0.038	Ferguson	1998	Genetic Resources and Crop Evolution 45(6): 549-559.
Lens nigricans	Allozyme		0.232	Ferguson	1996	Euphytica 91(2): 163-172.
Lens nigricans	RAPD		0.018	Ferguson	1998	Genetic Resources and Crop Evolution 45(6): 549-559.
Lens odemensis	Allozyme		0.183	Ferguson	1996	Euphytica 91(2): 163-172.
Lens odemensis	RAPD		0.005	Ferguson	1998	Genetic Resources and Crop Evolution 45(6): 549-559.
Lepidium draba	RAPD	0.1771		Aksakal	2010	Biochemical Genetics48(7-8): 603-611.
Leptodactylon californicum	Allozyme	0.19		Schultz	2001	Systematic Botany 26(1): 75-91.
Leucothrinax morrisii	ISSR		0.216	Namoff	2010	Biological Conservation 143(5): 1110-1117.
Liatris helleri	Allozyme	0.219	0.276	Godt	1996	Biodiversity and Conservation 5(4): 461-471.
Ligularia sibirica	Allozyme	0.36		Smidova	2011	Flora 206(2): 151-157.
Ligusticum mutellinoides	AFLP	0.19	0.27	Meirmans	2011	Molecular Ecology 20(15): 3144-3155.
Lilium maculatum var. bukosanense	ISSR	0.19		Arzate-Fernandez	2005	Plant Species Biology 20(1): 57-65.
Lilium martagon	RAPD	0.21		Persson	1998	Hereditas 128(3): 213-220.
Lilium philadelphicum	SSR	0.69		Horning	2009	American Midland Naturalist 161(2): 286-300.
Lilium tsingtauense	ISSR	0.204	0.231	Guo	2011	Biochemical Systematics and Ecology 39(4-6): 352-360.
Limnanthes floccosa ssp. californica	SSR	0.19		Sloop	2011	Conservation Genetics 12(1): 311-323.
Limonium narbonense	SSR	0.502	0.544	Palop-Esteban	2011	Genetica 139(10): 1309-1322.
Limonium sinense	AFLP	0.195	0.284	Ding	2013	Plant Systematics and Evolution 299(1): 131-138.
Limonium sinense	ISSR	0.176	0.257	Ding	2013	Plant Systematics and Evolution 299(1): 131-138.
Linaria aeruginea ssp. aeruginea	Allozyme	0.248	0.27	Segarra-Moragues	2007	Conservation Genetics 8(2): 373-383.
Linaria aeruginea ssp. cardonica	Allozyme	0.226	0.23	Segarra-Moragues	2007	Conservation Genetics 8(2): 373-383.
Linaria arvensis	Allozyme	0.102	0.123	Segarra-Moragues	2007	Conservation Genetics 8(2): 373-383.
Linaria depauperata ssp. depauperata	Allozyme	0.246	0.256	Segarra-Moragues	2007	Conservation Genetics 8(2): 373-383.
Linaria depauperata ssp. hegelmaieri	Allozyme	0.232	0.228	Segarra-Moragues	2007	Conservation Genetics 8(2): 373-383.
Linaria depauperata ssp. ilergabona	Allozyme	0.208	0.215	Segarra-Moragues	2007	Conservation Genetics 8(2): 373-383.
Linaria micrantha	Allozyme	0.054	0.176	Segarra-Moragues	2007	Conservation Genetics 8(2): 373-383.
Linaria simplex	Allozyme	0.031	0.104	Segarra-Moragues	2007	Conservation Genetics 8(2): 373-383.
Lindera benzoin	SSR	0.639		Mooney	2010	Population Ecology 52(3): 417-425.
Liparis makinoana	Allozyme	0.317		Chung	2005	Molecular Ecology 14(14): 4389-4402.
Lippia origanoides	AFLP	0.27357	0.31999	Vega-Vela	2012	Ecology and Evolution 2(11): 2669-2681.
Liriodendron tulipifera	Allozyme	0.214	0.31	Parks	1994	American Journal of Botany 81(7): 878-889.
Listera ovata	Allozyme	0.045		Brzosko	2003	Annales Botanici Fennici 40(5): 309-315.
Lithocarpus densiflorus	SSR	0.535		Nettel	2009	American Journal of Botany 96(12): 2224-2233.
Lithophragma maximum	SSR	0.229	0.504	Furches	2009	Conservation Genetics 10(1): 115-126.
Lithospermum canescens	AFLP	0.2996	0.3093	Kittelson	2006	Journal of the Torrey Botanical Society 133(4): 513-518.
Livistona carinensis	SSR	0.023		Shapcott	2009	Conservation Genetics 10(2): 317-327.
Lloydia serotina	Allozyme	0.064		Jones	1999	Plant Ecology 141(1-2): 151-161.
Lobelia giberroa	AFLP	0.0605		Kebede	2007	Molecular Ecology 16(6): 1233-1243.
Lobelia rhynchopetalum	ISSR	0.132	0.373	Geleta	2009	Hereditas 146(3): 122-130.
Loiseleuria procumbens	AFLP	0.16	0.25	Meirmans	2011	Molecular Ecology 20(15): 3144-3155.
Lolium perenne	Allozyme	0.335	0.353	Fernando	1997	Euphytica 93(3): 263-269.
Lolium perenne	SSR		0.63	Brazauskas	2011	Plant Science 181(4): 412-20.
Lomatia polymorpha	Allozyme		0.173	Lynch	1998	Australian Journal of Botany 46(1): 25-33.
Lomatia tinctoria	Allozyme	0.134	0.173	Lynch	1998	Australian Journal of Botany 46(1): 25-33.
Lonicera japonica	Allozyme	0.2581	0.2878	Schierenbeck	1995	Heredity 75: 1-9.
Lonicera sempervirens	Allozyme	0.2594	0.3107	Schierenbeck	1995	Heredity 75: 1-9.
Lotus genistoides	Allozyme		0.135	Olive-Tejera	2005	Heredity 94(2): 199-206.
Lotus holosericeus	Allozyme	0.161		Olive-Tejera	2005	Heredity 94(2): 199-206.
Lotus spartioides	Allozyme	0.16		Olive-Tejera	2005	Heredity 94(2): 199-206.
Luculia pinceana	SSR	0.55		Zhou	2012	Molecular Ecology 21(18): 4631-4645.
Luma apiculata	Allozyme	0.113	0.167	Caldiz	2005	Australian Journal of Botany 53(8): 781-787.
Lupinus oreganus	SSR	0.41		Severns	2011	Conservation Genetics 12(4): 881-893.
Luzula alpinopilosa	AFLP	0.07	0.11	Meirmans	2011	Molecular Ecology 20(15): 3144-3155.
Lychnis flos-cuculi	Allozyme	0.157		Van Rossum	2009	Belgian Journal of Botany 142(2): 98-110.
Lychnis flos-cuculi	SSR	0.828		Galeuchet	2005	Molecular Ecology 14(4): 991-1000.
Lychnis viscaria	Allozyme	0.056		Lammi	1999	Conservation Biology 13(5): 1069-1078.
Lycopersicon esculentum	SSR	0.33		Martins	2011	Genetics and Molecular Research 10(2): 665-677.
Lycoris longituba	RAPD	0.1671	0.1897	Deng	2006	Journal of Genetics 85(3): 205-207.
Lysimachia japonica	AFLP	0.0876	0.1201	Nakazawa	2007	Plant Species Biology 22(1): 33-39.
Lysimachia mauritiana	Allozyme	0.026		Kono	2012	Annals of Botany 110(6): 1119-1135.
Lysimachia tashiroi	AFLP	0.154	0.1979	Nakazawa	2007	Plant Species Biology 22(1): 33-39.
Macbridea alba	Allozyme	0.099	0.121	Godt	2004	Journal of Heredity 95(3): 244-249.
Magnolia cathcartii	AFLP	0.122	0.162	Zhang	2010	Journal of Plant Research 123(3): 321-31.
Magnolia fraseri	Allozyme	0.111	0.139	Qiu	1994	American Journal of Botany 81(10): 1300-1308.
Magnolia macrophylla	Allozyme	0.055	0.125	Qiu	1994	American Journal of Botany 81(10): 1300-1308.
Magnolia obovata	SSR		0.87	Isagi	2000	Heredity 84(2): 143-151.
Magnolia officinalis	ISSR	0.194	0.342	Yu	2011	Biochemical Systematics and Ecology 39(2): 71-78.
Magnolia officinalis ssp. biloba	AFLP	0.208	0.262	He	2009	Genetica 135(2): 233-243.
Magnolia sieboldii ssp. japonica	SSR	0.427		Kikuchi	2002	Heredity 88: 313-321.
Magnolia stellata	SSR	0.719	0.882	Tamaki	2008	Heredity 100(4): 415-423.
Magnolia tripetala	Allozyme	0.033	0.062	Qiu	1994	American Journal of Botany 81(10): 1300-1308.
Malus sieversii	SSR		0.749	Richards	2009	Tree Genetics & Genomes 5(2): 339-347.
Manihot esculenta	SSR	0.5358	0.6499	Fregene	2003	Theoretical and Applied Genetics 107(6): 1083-1093.
Manilkara huberi	SSR		0.856	Azevedo	2007	Journal of Heredity 98(7): 646-654.
Meconopsis quintuplinervia	RAPD	0.2408	0.286	Yang	2010	African Journal of Biotechnology 9(21): 3048-3053.
Medicago citrina	AFLP	0.082		Juan	2004	Molecular Ecology 13(9): 2679-2690.
Medicago laciniata	SSR	0.32		Badri	2008	Journal of Genetics 87(3): 241-255.
Medicago lupulina	SSR	0.246		Yan	2009	Annals of Botany 103(6): 825-834.
Medicago ruthenica	SSR	0.677		Yan	2009	Annals of Botany 103(6): 825-834.
Medicago sativa	RAPD	0.173		Jenczewski	1998	Molecular Ecology 8(8): 1317-1330.
Medicago sativa	SSR		0.74	Sakiroglu	2010	Theoretical and Applied Genetics 121(3): 403-415.
Medicago sativa ssp. falcata	Allozyme	0.836		Kaljund	2010	Biochemical Systematics and Ecology 38(4): 510-520.
Medicago truncatula	Allozyme		0.259	Siol	2008	Heredity 100(5): 517-525.
Medicago truncatula	RAPD	0.146		Bonnin	1996	American Journal of Botany 83(7): 843-855.
Medicago truncatula	SSR		0.747	Ronfort	2006	BMC Plant Biology 6: 28.
Medusagyne oppositifolia	SSR	0.52		Finger	2011	Molecular Ecology 20(18): 3773-3784.
Megacodon stylophorus	ISSR	0.0532	0.1949	Ge	2005	Biodiversity and Conservation 14(4): 849-861.
Megaleranthis saniculifolia	Allozyme	0.108	0.151	Jeong	2012	Australian Journal of Botany 60(7): 582-591.
Megaleranthis saniculifolia	ISSR	0.12	0.215	Jeong	2012	Australian Journal of Botany 60(7): 582-591.
Melaleuca alternifolia	SSR		0.781	Rossetto	1999	Molecular Ecology 8(4): 633-643.
Melaleuca quinquenervia	Allozyme	0.356	0.592	Dray	2009	Aquatic Botany 90(4): 296-302.
Melica ciliata	AFLP	0.053		Szczepaniak	2011	Acta Societatis Botanicorum Poloniae 80(4): 301-313.
Melica transsilvanica	AFLP	0.039		Szczepaniak	2011	Acta Societatis Botanicorum Poloniae 80(4): 301-313.
Melocactus curvispinus	Allozyme	0.098	0.145	Nassar	2001	Heredity 87: 69-79.
Mentha pulegium	Allozyme	0.229		Ben-Fadhel	2004	Genetic Resources and Crop Evolution 51(3): 309-321.
Menziesia ferruginea ssp. ferruginea	Allozyme	0.085	0.124	Wells	1994	Systematic Botany 19(3): 407-423.
Menziesia ferruginea ssp. glabella	Allozyme	0.114	0.137	Wells	1994	Systematic Botany 19(3): 407-423.
Menziesia pilosa	Allozyme	0.067	0.081	Wells	1994	Systematic Botany 19(3): 407-423.
Mercurialis annua	SSR	0.585		Korbecka	2011	Annals of Botany 107(6): 1057-1061.
Metasequoia glyptostroboides	RAPD	0.2484	0.3519	Li	2005	Conservation Biology 19(1): 224-231.
Metrodorea nigra	SSR		0.588	Guidugli	2012	Genetics and Molecular Research 11(1): 101-6.
Metrosideros bartlettii	AFLP		0.18	Drumond	2000	Molecular Ecology 9(8): 1149-1157.
Metrosideros polymorpha	Allozyme	0.166	0.192	Aradhya	1993	Genetical Research 61(3): 159-170.
Metrosideros rugosa	Allozyme	0.47		Aradhya	1991	Heredity 67: 129-138.
Metrosideros tremuloides	Allozyme	0.296		Aradhya	1991	Heredity 67: 129-138.
Meum athamanticum	AFLP	0.18		Huck	2012	Flora 207(6): 399-407.
Michelia coriacea	ISSR	0.226	0.283	Zhao	2012	International Journal of Molecular Sciences 13(4): 4396-4411.
Michelia coriacea	SSR	0.47	0.505	Zhao	2012	International Journal of Molecular Sciences 13(4): 4396-4411.
Michelia formosana	Allozyme	0.241		Lin	2001	Theoretical and Applied Genetics 102(2-3): 450-457.
Michelia maudiae	SSR	0.583	0.701	Sun	2011	Genetica 139(11-12): 1439-1447.
Mikania micrantha	AFLP	0.1677	0.3376	Wang	2012	Plos One 7(7): e41310.
Milicia excelsa	SSR	0.533		Dainou	2010	Molecular Ecology 19(20): 4462-4477.
Mimetes fimbriifolius	AFLP	0.23		Reisch	2010	Plant Biology 12(3): 537-544.
Mimetes hirtus	AFLP	0.15		Reisch	2010	Plant Biology 12(3): 537-544.
Mimulus guttatus	Allozyme	0.235	0.357	Fenster	1992	American Journal of Botany 79(12): 1440-1447.
Mimulus guttatus	SSR	0.5		Awadalla	1997	Molecular Biology and Evolution 14(10): 1023-1034.
Mimulus lacinaiatus	SSR	0.32		Awadalla	1997	Molecular Biology and Evolution 14(10): 1023-1034.
Mimulus micranthus	Allozyme	0.064	0.097	Fenster	1992	American Journal of Botany 79(12): 1440-1447.
Mimulus nasutus	SSR		0.49	Awadalla	1997	Molecular Biology and Evolution 14(10): 1023-1034.
Mimulus platycalyx	SSR		0.4	Awadalla	1997	Molecular Biology and Evolution 14(10): 1023-1034.
Monimopetalum chinense	AFLP	0.155	0.232	Li	2011	Biochemical Systematics and Ecology 39(4-6): 384-391.
Monotropa hypopitys	SSR	0.629		Beatty	2011	BMC Evol Biology 11: 29.
Monstera adansonii var. klotzschiana	AFLP	0.1599		Andrade	2007	Annals of Botany 100(6): 1143-1154.
Moringa oleifera	AFLP	0.067		Muluvi	1999	Molecular Ecology 8(3): 463-470.
Mucuna pruriens	RAPD		0.43	Padmesh	2006	Biologia Plantarum 50(3): 367-372.
Murraya koenigii	ISSR	0.1862	0.2515	Verma	2011	Biochemical Systematics and Ecology 39(2): 139-144.
Musa balbisiana	SSR	0.3548	0.5397	Ge	2005	Molecular Ecology 14(4): 933-944.
Muscari tenuiflorum	Allozyme	0.348		Hornemann	2012	Flora 207(10): 736-743.
Myracrodruon urundeuva	SSR		0.64	Gaino	2010	Conservation Genetics 11(5): 1631-1643.
Myrica adenophora	Allozyme	0.106	0.126	Cheng	2000	Journal of Heredity 91(1): 61-66.
Myrica cerifera	Allozyme	0.14	0.138	Erickson	2003	Heredity 90(1): 25-32.
Myrica cerifera	SSR	0.819		Erickson	2004	Molecular Ecology 13(6): 1655-1664.
Myrica faya	SSR	0.63	0.668	Gonzalez-Perez	2009	Annals of Botany 103(1): 79-86.
Myrica rivas-martinezii	SSR	0.527	0.56	Gonzalez-Perez	2009	Annals of Botany 103(1): 79-86.
Myrica rubra	Allozyme	0.163	0.191	Cheng	2000	Journal of Heredity 91(1): 61-66.
Myricaria laxiflora	AFLP	0.154	0.262	Liu	2006	American Journal of Botany 93(2): 206-215.
Myricaria laxiflora	Allozyme	0.29	0.3	Liu	2010	Biochemical Systematics and Ecology 38(4): 463-470.
Myricaria laxiflora	ISSR	0.266	0.294	Tian	2012	Aquatic Botany 103: 48-53.
Myrtus communis	AFLP	0.13	0.33	Bruna	2007	Scientia Horticulturae 113(4): 370-375.
Myrtus communis	Allozyme		0.088	Aparicio	2012	Diversity and Distributions 18(3): 226-235.
Narcissus longispathus	Allozyme	0.117	0.139	Medrano	2008	Annals of Botany 102(2): 183-194.
Narcissus pseudonarcissus	RAPD	0.327		Colling	2010	Plant Systematics and Evolution 287(3-4): 99-111.
Narcissus triandrus	SSR	0.57	0.62	Hodgins	2007	Molecular Ecology 16(11): 2317-2332.
Nelumbo nucifera	Allozyme		0.05	Tian	2008	Scientia Horticulturae 116(4): 421-429.
Neobalanocarpus heimii	SSR		0.775	Konuma	2000	Molecular Ecology 9(11): 1843-1852.
Neolitsea sericea	RAPD	0.073	0.17	Wang	2005	Annals of Botany 95(2): 305-313.
Neolitsea sericea	SSR	0.629	0.717	Zhai	2012	Journal of Biogeography 39(7): 1347-1360.
Neopicrorhiza scrophulariiflora	ISSR	0.1237	0.4073	Liu	2011	Biochemical Systematics and Ecology 39(4-6): 297-301.
Neostapfia colusana	SSR	0.71		Gordon	2012	Conservation Genetics 13(1): 117-130.
Neotinea maculata	AFLP	0.176		Duffy	2009	Annals of Botany 104(3): 507-516.
Nicotiana tabacum	SSR		0.59	Fricano	2012	BMC Genetics 13: 18.
Nigella arvensis	RAPD	0.245		Brutting	2012	Biodiversity and Conservation 21(3): 745-761.
Nothapodytes nimmoniana	ISSR	0.1518	0.2965	Kareem	2011	Plant Genetic Resources-Characterization and Utilization 9(4): 506-514.
Nothofagus antarctica	Allozyme	0.207	0.251	Acosta	2012	Australian Journal of Botany 60(4): 319-327.
Nothofagus pumilio	Allozyme	0.07	0.091	Acosta	2012	Australian Journal of Botany 60(4): 319-327.
Nouelia insignis	ISSR	0.1491	0.2248	Luan	2006	Annals of Botany 98(3): 583-589.
Nuphar lutea	SSR	0.51	0.681	Fer	2008	Freshwater Biology 53(7): 1409-1422.
Nuttallanthus canadensis	Allozyme	0.076	0.136	Crawford	2006	American Journal of Botany 93(4): 582-591.
Nuttallanthus floridanus	Allozyme	0.043	0.13	Crawford	2006	American Journal of Botany 93(4): 582-591.
Nuttallanthus texanus	Allozyme	0.073	0.242	Crawford	2006	American Journal of Botany 93(4): 582-591.
Nymphoides coreana	Allozyme	0.02	0.28	Shibayama	2008	Plant Species Biology 23(3): 212-216.
Nymphoides peltata	SSR	0.357	0.512	Uesugi	2007	Conservation Genetics 8(1): 111-121.
Ocotea catharinensis	Allozyme	0.378	0.427	Tarazi	2010	Conservation Genetics 11(3): 965-976.
Oenocarpus bataua	SSR		0.66	Ottewell	2012	Heredity 109(6): 332-339.
Olea europaea	AFLP		0.25	Belaj	2003	Theoretical and Applied Genetics 107(4): 736-744.
Olea europaea	RAPD		0.28	Belaj	2003	Theoretical and Applied Genetics 107(4): 736-744.
Olea europaea	SSR	0.631	0.696	Koehmstedt	2011	Genetic Resources and Crop Evolution 58(4): 519-531.
Olea europaea ssp. cuspidata	ISSR	0.194	0.287	Noormohammadi	2012	Genetics and Molecular Research 11(1): 707-716.
Olearia gardneri	AFLP	0.13	0.17	Barnaud	2010	Conservation Genetics 11(4): 1515-1522.
Oncidium hookeri	Allozyme	0.099		Alcantara	2006	Annals of Botany 98(6): 1207-1213.
Ophiopogon intermedius	Allozyme	0.352	0.426	He	2000	Biological Conservation 96(2): 253-257.
Oplopanax elatus	Allozyme		0.113	Kholina	2010	Russian Journal of Genetics 46(5): 555-561.
Opuntia echios	SSR	0.7199		Helsen	2011	Journal of Molecular Evolution 72(3): 315-325.
Orchis purpurea	AFLP	0.21	0.23	Jacquemyn	2007	Biological Conservation 139(1-2): 203-210.
Oreorchis patens	Allozyme	0.237	0.258	Chung	2012	Journal of Heredity 103(5): 692-702.
Origanum vulgare	AFLP	0.27		Van Looy	2009	Biological Conservation 142(4): 870-878.
Orobanche cumana	RAPD	0.076	0.18	Gagne	1998	Theoretical and Applied Genetics 96(8): 1216-1222.
Orthilia secunda	SSR	0.677		Beatty	2011	BMC Evol Biology 11: 29.
Orychophragmus violaceus	ISSR	0.3464	0.4242	Zhang	2010	Genetic Resources and Crop Evolution 57(1): 55-64.
Oryza eichingeri	SSR		0.376	Bao	2006	Journal of Plant Biology 49(5): 339-347.
Oryza glaberrima	SSR		0.27	Semon	2005	Genetics 169(3): 1639-1647.
Oryza glumaepatula	Allozyme	0.089	0.37	Buso	1998	Molecular Ecology 7(1): 107-117.
Oryza glumaepatula	RAPD	0.089	0.37	Buso	1998	Molecular Ecology 7(1): 107-117.
Oryza glumaepatula	SSR	0.113		Vianello Brondani	2005	Genetica 125(2-3): 115-123.
Oryza granulata	Allozyme	0.016	0.017	Gao	2000	International Journal of Plant Sciences 161(4): 691-697.
Oryza latifolia	Allozyme	0.3087		Quesada	2002	Genetic Resources and Crop Evolution 49(6): 633-643.
Oryza officinalis	Allozyme	0.029	0.0266	Gao	2001	Journal of Heredity 92(6): 511-516.
Oryza officinalis	SSR		0.565	Bao	2006	Journal of Plant Biology 49(5): 339-347.
Oryza punctata	SSR		0.272	Bao	2006	Journal of Plant Biology 49(5): 339-347.
Oryza rhizomatis	SSR		0.222	Bao	2006	Journal of Plant Biology 49(5): 339-347.
Oryza rufipogon	Allozyme	0.068		Gao	2000	Theoretical and Applied Genetics 101(3): 494-502.
Oryza rufipogon	SSR	0.413	0.787	Zhou	2003	Theoretical and Applied Genetics 107(2): 332-339.
Oryza sativa	Allozyme		0.36	Li	2000	Theoretical and Applied Genetics 101(3): 379-387.
Oryza sativa	SSR		0.544	Zhang	2011	Plos One 6(12): e27565.
Oryza sativa f. spontanea	SSR		0.313	Cao	2006	Annals of Botany 98(6): 1241-1252.
Ottelia alismoides	ISSR	0.042	0.101	Chen	2008	Aquatic Botany 88(1): 10-16.
Oxalis pes-caprae	AFLP	0.24		Rottenberg	2004	Proceedings of the Royal Society 271 Suppl. 4: S206-S208.
Oxytropis campestris var. chartacea	AFLP	0.13		Chung	2004	Molecular Ecology 13(12): 3657-3673.
Paeonia rockii	SSR	0.492	0.749	Yuan	2012	Plos One 7(4): e34955.
Palicourea coriacea	RAPD	0.296		Barbosa	2010	Genetics and Molecular Research 9(2): 695-704.
Panax ginseng	AFLP	0.2152	0.2555	Zhuravlev	2008	Acta Pharmacologica Sinica 29(9): 1127-1136.
Panax ginseng	Allozyme	0.023	0.024	Zhuravlev	2008	Acta Pharmacologica Sinica 29(9): 1127-1136.
Panax ginseng	RAPD		0.1348	Artyukova	2004	Russian Journal of Genetics 40(2): 178-185.
Panax ginseng	SSR	0.1906	0.2591	Zhuravlev	2008	Acta Pharmacologica Sinica 29(9): 1127-1236.
Panax notoginseng	AFLP	0.12	0.155	Wang	2008	Acta Pharmacologica Sinica 29(9): 1137-1140.
Panax quinquefolius	Allozyme	0.072		Cruse-Sanders	2004	American Journal of Botany 91(4): 540-548.
Panax quinquefolius	RAPD		0.1637	Artyukova	2004	Russian Journal of Genetics 40(2): 178-185.
Pancratium maritimum	AFLP	0.0014	0.0035	Grassi	2005	Biodiversity and Conservation 14(9): 2159-2169.
Pancratium maritimum	Allozyme	0.088	0.1	Sanaa	2010	Scientia Horticulturae 125(4): 740-747.
Panicum miliaceum	SSR		0.834	Hu	2009	Journal of Genetics and Genomics 36(8): 491-500.
Papaver alpinum	AFLP	0.099		Kropf	2006	New Phytologist 172(1): 169-184.
Parashorea tomentella	SSR		0.608	Kettle	2011	Perspectives in Plant Ecology Evolution and Systematics 13(1): 45-54.
Paris polyphylla var. yunnanensis	ISSR	0.152		He	2007	Planta Medica 73(12): 1316-1321.
Paris quadrifolia	AFLP	0.0926		Jacquemyn	2006	Oecologia 147(3): 434-444.
Parnassia palustris	Allozyme	0.19		Bonnin	2002	Molecular Ecology11(6): 979-990.
Pedicularis dasyantha	Allozyme	0.004	0.016	Odasz	1996	American Journal of Botany 83(11): 1379-1385.
Pennisetum glaucum (domesticated)	Allozyme	0.23		Ibrahima	2005	Genetic Resources and Crop Evolution 52(8): 1087-1097.
Pennisetum glaucum (domesticated)	SSR		0.6	Oumar	2008	Theoretical and Applied Genetics 117(4): 489-497.
Pennisetum glaucum (wild)	SSR		0.72	Oumar	2008	Theoretical and Applied Genetics 117(4): 489-497.
Penstemon deustus	SSR	0.771		Kramer	2011	American Journal of Botany 98(1): 109-121.
Penstemon pachyphyllus	SSR	0.62		Kramer	2011	American Journal of Botany 98(1): 109-121.
Penstemon rostriflorus	SSR	0.813		Kramer	2011	American Journal of Botany 98(1): 109-121.
Pereskia guamacho	Allozyme	0.202	0.239	Nassar	2002	Journal of Heredity 93(3): 193-200.
Persoonia glaucescens	AFLP	0.148	0.154	Rymer	2006	Conservation Genetics 7(6): 919-930.
Persoonia lanceolata	AFLP	0.128	0.135	Rymer	2006	Conservation Genetics 7(6): 919-930.
Persoonia mollis	Allozyme	0.109	0.139	Krauss	1997	Heredity 78: 41-49.
Persoonia mollis ssp. maxima	AFLP	0.17	0.181	Rymer	2006	Conservation Genetics 7(6): 919-930.
Persoonia mollis ssp. nectens	AFLP	0.124	0.126	Rymer	2006	Conservation Genetics 7(6): 919-930.
Persoonia mollis ssp. nectens	SSR		0.619	Ayre	2009	Journal of Ecology 97(4): 752-760.
Petasites frigidus complex	Allozyme	0.1707	0.3035	Cherniawsky	1998	Canadian Journal of Botany 76(8): 1476-1487.
Petasites palmatus	Allozyme	0.1147	0.3483	Cherniawsky	1998	Canadian Journal of Botany 76(8): 1476-1487.
Petasites sagittatus	Allozyme	0.0947	0.3183	Cherniawsky	1998	Canadian Journal of Botany 76(8): 1476-1487.
Petasites vitifolius	Allozyme	0.1367	0.2533	Cherniawsky	1998	Canadian Journal of Botany 76(8): 1476-1487.
Petrocoptis montsicciana	Allozyme	0.239	0.384	Lopez-Pujol	2001	Canadian Journal of Botany 79(12): 1379-1389.
Petrocoptis pardoi	Allozyme	0.192	0.298	Lopez-Pujol	2001	Canadian Journal of Botany 79(12): 1379-1389.
Peucedanum ostruthium	AFLP	0.17	0.26	Meirmans	2011	Molecular Ecology 20(15): 3144-3155.
Phacelia dubia	Allozyme	0.05		Levy	1999	Heredity 82: 422-431.
Phaedranassa tunguraguae	SSR	0.74		Oleas	2012	Journal of Heredity 103(4): 557-569.
Phaseolus coccineus	AFLP	0.163		Boczkowska	2012	Genetic Resources and Crop Evolution 59(4): 473-478.
Phaseolus coccineus	SSR	0.467		Spataro	2011	Theoretical and Applied Genetics 122(7): 1281-1291.
Phaseolus lunatus	Allozyme	0.082	0.193	Bi	2003	American Journal of Botany 90(6): 897-904.
Phaseolus lunatus	SSR	0.51		Marinez-Castillo	2006	Crop Science 46(3): 1071-1080.
Phaseolus vulgaris	AFLP		0.2199	Blair	2010	Theoretical and Applied Genetics 120(7): 1381-1391.
Phaseolus vulgaris	Allozyme		0.132	Koenig	1989	Theoretical and Applied Genetics 78(6): 809-817.
Phaseolus vulgaris	SSR		0.643	Blair	2009	Theoretical and Applied Genetics 119(6): 955-972.
Phellodendron amurense	AFLP	0.14	0.2312	Yan	2008	Zhongguo Zhong Yao Za Zhi 33(10): 1121-1125.
Phlomis composita	Allozyme		0.079	Aparicio	2000	Annals of Botany 85(1): 7-12.
Phlomis crinita ssp. crinita	Allozyme	0.053	0.088	Albaladejo	2007	Annals of Botany 100(4): 735-746.
Phlomis crinita ssp. malacitana	Allozyme	0.051	0.07	Albaladejo	2007	Annals of Botany 100(4): 735-746.
Phlomis lychnitis	Allozyme	0.089	0.099	Albaladejo	2007	Annals of Botany 100(4): 735-746.
Phlomis purpurea	Allozyme		0.0848	Aparicio	2000	Annals of Botany 85(1): 7-12.
Phoenix canariensis	Allozyme	0.158	0.199	Gonzalez-Perez	2004	Heredity 93(3): 307-315.
Phoenix dactylifera	Allozyme	0.277	0.341	Gonzalez-Perez	2004	Heredity 93(3): 307-315.
Phoenix dactylifera	SSR		0.853	Elshibli	2008	Genetica 134(2): 251-260.
Phragmites australis	AFLP	0.126		Lambertini	2008	Aquatic Botany 88(2): 160-170.
Phragmites australis	Allozyme	0.5	0.56	Drapikowska	2009	Oceanological and Hydrobiological Studies 38(2): 29-38.
Phragmites australis ssp. australis	SSR		0.51	Kirk	2011	American Journal of Botany 98(7): 1180-1190.
Phyteuma betonicifolium	AFLP	0.1	0.18	Meirmans	2011	Molecular Ecology 20(15): 3144-3155.
Phyteuma hemisphaericum	AFLP	0.1	0.17	Meirmans	2011	Molecular Ecology 20(15): 3144-3155.
Picea abies	AFLP	0.378	0.389	Achere	2005	Molecular Ecology 14(10): 3191-3201.
Picea abies	Allozyme	0.115	0.0121	Lagercrantz	1990	Evolution 44(1): 38-53.
Picea abies	RAPD		0.392	Bucci	2002	Molecular Ecology 11(3): 305-315.
Picea abies	SSR	0.789	0.796	Achere	2005	Molecular Ecology 14(10): 3191-3201.
Picea asperata	RAPD	0.247	0.318	Xue	2007	Plant Biology 9(1): 101-108.
Picea breweriana	Allozyme	0.129		Ledig	2005	American Journal of Botany 92(12): 1975-1986.
Picea glauca	Allozyme	0.161	0.163	Godt	2001	Canadian Journal of Forest Research 31(6): 943-949.
Picea glauca	SSR	0.737	0.77	Anderson	2011	Journal of Heredity 102(2): 207-216.
Picea mariana	Allozyme	0.3	0.303	Isabel	1995	Proceedings of the National Academy of Sciences, USA 92(14): 6369-6373.
Picea mariana	RAPD	0.321	0.33	Isabel	1995	Proceedings of the National Academy of Sciences, USA 92(14): 6369-6373.
Picea rubens	Allozyme	0.0789		Hawley	1994	Canadian Journal of Botany 72(12): 1778-1786.
Pilgerodendron uviferum	Allozyme	0.033	0.035	Premoli	2001	Heredity 87(3): 337-343.
Pilosella alpicola ssp. ullepitschii	Allozyme	0.185	0.257	Singliarova	2008	Plant Systematics and Evolution 275(3-4): 181-191.
Pilosocereus lanuginosus	Allozyme	0.253	0.274	Nassar	2003	American Journal of Botany 90(11): 1628-1637.
Pinguicula moranensis	RAPD	0.3212	0.3716	Alcala	2012	Biochemical Genetics 50(5-6): 416-427.
Pinus albicaulis	Allozyme	0.096	0.102	Jorgensen	1997	Canadian Journal of Forest Research 27(10): 1574-1585.
Pinus attenuata	Allozyme	0.11	0.13	Wu	1999	Genome 42(5): 893-908.
Pinus attenuata	RAPD	0.15	0.21	Wu	1999	Genome 42(5): 893-908.
Pinus banksiana	Allozyme	0.112	0.115	Godt	2001	Canadian Journal of Forest Research 31(6): 943-949.
Pinus caribaea	SSR		0.977	Jardon-Barbolla	2011	Annals of Botany 107(2): 229-241.
Pinus caribaea var. hondurensis	Allozyme	0.231	0.245	Dvorak	2005	International Journal of Plant Sciences 166(6): 985-994.
Pinus cembra	Allozyme	0.091	0.099	Belokon	2005	Russian Journal of Genetics 41(11): 1268-1280.
Pinus contorta	AFLP	0.284		Parchman	2011	American Journal of Botany 98(4): 669-679.
Pinus contorta	Allozyme		0.185	Conkle	1981	Plant Systematics and Evolution 270(3-4): 183-207.
Pinus contorta	SSR	0.714		Parchman	2011	American Journal of Botany 98(4): 669-679.
Pinus coulteri	Allozyme	0.148		Ledig	2000	Journal of Heredity 91(4): 307-315.
Pinus cubensis	SSR		0.752	Jardon-Barbolla	2011	Annals of Botany 107(2): 229-241.
Pinus densata	Allozyme	0.232		Wang	2001	Genetics 159(1): 337-346.
Pinus flexilis	Allozyme	0.3		Schuster	2000	Heredity 84: 348-361.
Pinus henryi	SSR		0.8829	Liu	2012	Biochemical Systematics and Ecology 42: 1-9.
Pinus jeffreyi	Allozyme		0.261	Conkle	1981	Plant Systematics and Evolution 270(3-4): 183-207.
Pinus kesiya	Allozyme	0.153		Myburg	1997	Silvae Genetica 46(5): 295-301.
Pinus lambertiana	Allozyme		0.275	Conkle	1981	Plant Systematics and Evolution 270(3-4): 183-207.
Pinus longaeva	Allozyme	0.134	0.135	Lee	2002	American Journal of Botany 89(4): 566-577.
Pinus longaeva	RAPD	0.13		Lee	2002	American Journal of Botany 89(4): 566-577.
Pinus maestrensis	SSR		0.889	Jardon-Barbolla	2011	Annals of Botany 107(2): 229-241.
Pinus monticola	AFLP	0.123	0.128	Kim	2003	Journal of Plant Biology 51(4): 260-268.
Pinus mugo	Allozyme	0.251		Sannikov	2011	Russian Journal of Ecology 42(4): 270-276.
Pinus muricata	Allozyme	0.11	0.15	Wu	1999	Genome 42(5): 893-908.
Pinus muricata	RAPD	0.13	0.22	Wu	1999	Genome 42(5): 893-908.
Pinus occidentalis	SSR		0.874	Jardon-Barbolla	2011	Annals of Botany 107(2): 229-241.
Pinus oocarpa	AFLP	0.342	0.369	Diaz	2001	Molecular Ecology 10(11): 2593-2603.
Pinus oocarpa	RAPD	0.358	0.403	Diaz	2001	Molecular Ecology 10(11): 2593-2603.
Pinus pinaster	AFLP	0.16	0.179	Mariette	2001	Heredity 86(4): 469-479.
Pinus pinaster	SSR	0.734	0.832	Mariette	2001	Heredity 86: 469-479.
Pinus radiata	Allozyme	0.14	0.15	Wu	1999	Genome 42(5): 893-908.
Pinus radiata	RAPD	0.17	0.22	Wu	1999	Genome 42(5): 893-908.
Pinus radiata	SSR	0.73	0.778	Karhu	2006	Journal of Evolutionary Biology 19(1): 167-175.
Pinus squamata	ISSR		0.029	Zhang	2005	Biochemical Genetics 43(5-6): 239-249.
Pinus squamata	RAPD		0.019	Zhang	2005	Biochemical Genetics 43(5-6): 239-249.
Pinus strobus	Allozyme		0.37	Jones	2006	Molecular Ecology 15(3): 851-861.
Pinus strobus	SSR	0.607		Rajora	2000	Molecular Ecology 9(3): 339-348.
Pinus sylvestris	Allozyme	0.227		Korshikov	2005	Russian Journal of Genetics 41(2): 155-166.
Pinus sylvestris	RAPD	0.327		Szmidt	1996	Heredity 76: 412-420.
Pinus tabuliformis	Allozyme	0.205		Wang	2001	Genetics 159(1): 337-346.
Pinus tabuliformis	SSR		0.8739	Liu	2012	Biochemical Systematics and Ecology 42: 1-9.
Pinus taeda (natural stand)	Allozyme		0.362	Conkle	1981	Plant Systematics and Evolution 270(3-4): 183-207.
Pinus yunnanensis	Allozyme	0.19		Wang	2001	Genetics 159(1): 337-346.
Piper cernuum	Allozyme	0.127	0.187	Mariot	2002	Journal of Heredity 93(5): 365-369.
Piperia yadonii	ISSR	0.059		George	2009	American Journal of Botany 96(11): 2022-2030.
Pistacia lentiscus	AFLP	0.07	0.1	Nahum	2008	Tree Genetics & Genomes 4(4): 777-785.
Pistacia lentiscus	Allozyme		0.122	Aparicio	2012	Diversity and Distributions 18(3): 226-235.
Pistacia lentiscus	RAPD	0.23	0.28	Nahum	2008	Tree Genetics & Genomes 4(4): 777-785.
Pistacia lentiscus	SSR		0.658	Albaladejo	2012	Plos One 7(11): e49012.
Pisum sativum	RAPD		0.496	Choudhury	2007	Genetica 130(2): 183-191.
Pisum sativum	SSR		0.63	Smykal	2008	Theoretical and Applied Genetics 117(3): 413-424.
Pitcairnia geyskesii	SSR	0.325		Boisselier-Dubayle	2010	Ecography 33(1): 175-184.
Plantago brutia	ISSR	0.16	0.19	De Vita	2009	Plant Biology 11(6): 821-828.
Plantago lanceolata	AFLP	0.219		Odat	2010	Molecular Ecology 13(5): 1251-1257.
Platanthera bifolia	Allozyme	0.082	0.093	Brzosko	2009	Folia Geobotanica 44(2): 131-144.
Platypodium elegans	SSR		0.808	Hufford	2003	Evolution 57(3): 518-526.
Poa annua	AFLP	0.233		Chwedorzewska	2012	Polish Polar Research 33(1): 63-80.
Podophyllum hexandrum	RAPD	0.1	0.34	Alam	2009	Indian Journal of Biotechnology 8(4): 391-399.
Polygonum capitatum	ISSR	0.2458		Zhou	2010	Zhongguo Zhong Yao Za Zhi 35(12): 1511-1517.
Pongamia pinnata	AFLP	0.229	0.247	Kesari	2010	AoB Plants 2010: plq017.
Pongamia pinnata	ISSR	0.023	0.042	Kesari	2010	AoB Plants 2010: plq017.
Pongamia pinnata	RAPD	0.024	0.038	Kesari	2010	AoB Plants 2010: plq017.
Populus alba	Allozyme		0.085	Rajora	1992	Theoretical and Applied Genetics 84(3-4): 291-298.
Populus alba	SSR	0.387		Lexer	2005	Molecular Ecology 14(4): 1045-1057.
Populus euphratica	AFLP	0.23		Vonlanthen	2010	American Journal of Botany 97(2): 234-242.
Populus euphratica	SSR	0.84		Wang	2011	Annals of Forest Science 68(6): 1143-1149.
Populus nigra	AFLP	0.15		Storme	2004	Theoretical and Applied Genetics 108(6): 969-981.
Populus nigra	Allozyme	0.13		Storme	2004	Theoretical and Applied Genetics 108(6): 969-981.
Populus nigra	SSR	0.72		Storme	2004	Theoretical and Applied Genetics 108(6): 969-981.
Populus pruinosa	SSR	0.75		Wang	2011	Plos One 6(10): e26530.
Populus tremula	Allozyme		0.096	Rajora	1992	Theoretical and Applied Genetics 84(3-4): 291-298.
Populus tremula	SSR	0.538		De Carvalho	2010	Molecular Ecology 19(8): 1638-1650.
Populus tremuloides	RAPD	0.22		Stevens	1999	Molecular Ecology 8(11): 1769-1780.
Posidonia australis	Allozyme	0.039		Waycott	1997	Heredity 79: 408-417.
Posidonia oceanica	SSR	0.275		Procaccini	2001	Molecular Ecology 10(6): 1413-1421.
Potamogeton malaianus	ISSR	0.2284	0.2471	Chen	2006	Ying Yong Sheng Tai Xue Bao 17(11): 2034-2040.
Potamogeton pectinatus	SSR	0.487		Nies	2005	Journal of Evolutionary Biology 18(1): 19-26.
Potentilla matsumurae	Allozyme	0.099		Shimono	2009	American Journal of Botany 96(4): 728-737.
Primula apennina	ISSR	0.204	0.242	Crema	2009	Plant Systematics and Evolution 280(1-2): 29-36.
Primula cuneifolia	Allozyme		0.162	Hirao	2008	Heredity 100(4): 424-430.
Primula elatior	AFLP	0.2832	0.2932	Jacquemyn	2004	Molecular Ecology 13(1): 211-219.
Primula elatior	Allozyme	0.069		Van Rossum	2002	Conservation Biology 16(5): 1286-1295.
Primula kisoana var. kisoana	SSR		0.802	Ohtani	2005	Plant Species Biology 20(3): 209-218.
Primula minima	AFLP		0.22	Reisch	2007	Botanical Journal of the Linnean Society 155(4): 549-556.
Primula nutans	SSR	0.14	0.326	Kreivi	2011	Conservation Genetics 12(6): 1551-1563.
Primula obconica	ISSR	0.173		Nan	2003	Annals of Botany 91(3): 329-333.
Primula sieboldii	SSR	0.71		Kitamoto	2005	Molecular Ecology 14(1): 149-157.
Primula sikkimensis	ISSR	0.268	0.4032	Wang	2008	Biochemical Genetics 46(1-2): 75-87.
Primula veris	Allozyme	0.103	0.121	Van Rossum	2004	Conservation Genetics 5(2): 231-245.
Primula vulgaris	Allozyme	0.062	0.076	Van Rossum	2004	Conservation Genetics 5(2): 231-245.
Primula vulgaris	SSR	0.573		Van Geert	2008	Conservation Genetics 9(4): 845-853.
Primulina tabacum	AFLP	0.22	0.339	Ni	2006	Genetica 127(1-3): 177-83.
Prunus africana	RAPD	0.068		Dawson	1999	Molecular Ecology 8(1): 151-156.
Prunus africana	SSR	0.662		Kadu	2013	Annals of Botany 111(1): 47-60.
Prunus armeniaca	AFLP	0.1413	0.1546	Yuan	2007	Journal of Genetics and Genomics 34(11): 1037-1047.
Prunus armeniaca	SSR		0.657	Akpınar	2010	Genetics and Molecular Research 9(1): 324-332.
Prunus avium	SSR	0.68		Mariette	2010	BMC Genetics 11: 77.
Prunus dulcis	SSR		0.86	Gouta	2010	Hereditas 147(6): 283-92.
Prunus lannesiana var. speciosa	SSR	0.62		Kato	2011	Journal of Plant Research 124(1): 11-23.
Prunus mahaleb	RAPD	0.1144		Jordano	2000	Molecular Ecology 9(9): 1293-1305.
Prunus persica	SSR		0.46	Aranzana	2010	BMC Genetics 11: 69.
Prunus serotina	SSR	0.76		Pairon	2010	Annals of Botany 105(6): 881-890.
Prunus ssiori	SSR		0.791	Nagamitsu	2004	Plant Ecology 174(1): 1-10.
Psammochloa villosa	Allozyme	0.039	0.104	Wang	1999	Acta Botanica Sinica 41(5): 537-540.
Psathyrostachys juncea	Allozyme	0.521	0.557	Yang	2008	Proceedings of the International Symposium on Asian Plants with Unique Horticultural Potential 769: 441-447.
Pseudopanax ferox	SSR		0.663	Shepherd	2011	Molecular Ecology 20(7): 1389-1400.
Pseudotsuga menziesii	Allozyme	0.15	0.2	Aagaard	1998	Heredity 81: 69-78.
Pseudotsuga menziesii	RAPD	0.19	0.27	Aagaard	1998	Heredity 81: 69-78.
Pseudotsuga menziesii	SSR		0.936	Krutovsky	2009	Tree Genetics & Genomes 5(4): 641-658.
Psychotria ipecacuanha	ISSR	0.119	0.355	Rossi	2009	Genetica 136(1): 57-67.
Psychotria officinalis	Allozyme	0.184		Loiselle	1995	American Journal of Botany 82(11): 1420-1425.
Psychotria tenuinervis	Allozyme	0.33		Ramos	2010	Biochemical Genetics 48(3-4): 215-228.
Psychotria tenuinervis	SSR	0.33		Ramos	2010	Biochemical Genetics 48(3-4): 215-228.
Pterocarpus officinalis	AFLP	0.21		Rivera-Ocasio	2002	Molecular Ecology 11(4): 675-683.
Pterocarpus officinalis	SSR	0.41	0.57	Muller	2009	Genetica 135(2): 185-198.
Pteroceltis tatarinowii	ISSR	0.2892	0.3589	Chai	2010	Plant Systematics and Evolution 285(1-2): 65-73.
Pterostylis aff. alata	Allozyme	0.079	0.101	Sharma	2001	Biochemical Systematics and Ecology 29(7): 697-710.
Pterostylis angusta	Allozyme	0.088	0.094	Sharma	2001	Biochemical Systematics and Ecology 29(7): 697-710.
Pterostylis aspera	Allozyme	0.159	0.18	Sharma	2001	Biochemical Systematics and Ecology 29(7): 697-710.
Pterostylis hamiltonii	Allozyme	0.166	0.196	Sharma	2001	Biochemical Systematics and Ecology 29(7): 697-710.
Pterostylis rogersii	Allozyme	0.124	0.155	Sharma	2001	Biochemical Systematics and Ecology 29(7): 697-710.
Pterostylis scabra	Allozyme	0.201	0.255	Sharma	2001	Biochemical Systematics and Ecology 29(7): 697-710.
Puccinellia lemmonii	Allozyme	0.121		Davis	1993	Taxon 42(3): 585-599.
Puccinellia pungens	Allozyme	0.043	0.045	Perez-Collazos	2007	Botanical Journal of the Linnean Society 154(2): 269-281.
Pueraria lobata (ramet)	Allozyme	0.204	0.294	Pappert	2000	American Journal of Botany 87(9): 1240-1245.
Pulmonaria officinalis	SSR	0.6		Meeus	2012	Annals of Botany 109(1): 227-235.
Punica granatum	AFLP	0.1173	0.1539	Yuan	2007	Journal of Genetics and Genomics 34(12): 1061-1071.
Punica granatum	ISSR	0.13	0.25	Narzary	2010	Plant Biology 12(5): 806-813.
Punica granatum	SSR		0.245	Hasnaoui	2012	Gene 493(1): 105-112.
Puya raimondii	AFLP	0.0114	0.2951	Sgorbati	2004	Plant Biology 6(2): 222-230.
Pyrus communis	SSR		0.78	Sehic	2012	Scientia Horticulturae 145: 39-45.
Quercus agrifolia	AFLP		0.2	Dodd	2003	Theoretical and Applied Genetics 107(5): 884-892.
Quercus coccifera	Allozyme		0.154	Aparicio	2012	Diversity and Distributions 18(3): 226-235.
Quercus crispula	SSR	0.726		Ohsawa	2011	Scandinavian Journal of Forest Research 26(4): 305-318.
Quercus geminata	SSR		0.31	Ainsworth	2003	Molecular Ecology 12(2): 527-532.
Quercus hypoleucoides	SSR	0.755		Penaloza-Ramirez	2010	Annals of Botany 105(3): 389-399.
Quercus ilex	SSR	0.69		Ortego	2010	Journal of Heredity 101(6): 717-726.
Quercus kelloggi	AFLP		0.2	Dodd	2003	Theoretical and Applied Genetics 107(5): 884-892.
Quercus laevis	Allozyme	0.263	0.264	Berg	1995	Evolution 49(1): 110-120.
Quercus liaotungensis	SSR	0.762		Zeng	2011	Molecular Ecology 20(23): 4995-5011.
Quercus lobata	SSR		0.74	Dutech	2005	American Journal of Botany 92(2): 252-261.
Quercus mongolica	SSR	0.746		Zeng	2011	Molecular Ecology 20(23): 4995-5011.
Quercus parvula	AFLP		0.21	Dodd	2003	Theoretical and Applied Genetics 107(5): 884-892.
Quercus petraea	AFLP	0.1774	0.2437	Kelleher	2005	Annals of Botany 96(7): 1237-1146.
Quercus petraea	Allozyme	0.381	0.392	Le Corre	1997	Molecular Ecology 6(6): 519-529.
Quercus petraea	RAPD	0.233	0.239	Le Corre	1997	Molecular Ecology 6(6): 519-529.
Quercus petraea	SSR	0.822		Alberto	2010	Molecular Ecology 19(13): 2626-2639.
Quercus robur	AFLP	0.2301	0.2645	Kelleher	2005	Annals of Botany 96(7): 1237-1146.
Quercus robur	Allozyme	0.155		Gomory	2001	Heredity 86(5): 557-563.
Quercus robur	SSR		0.87	Streiff	1998	Molecular Ecology 7(3): 317-328.
Quercus rubra	Allozyme		0.424	Jones	2006	Journal of Ecology 84(3): 449-459.
Quercus scytophylla	SSR	0.8		Penaloza-Ramirez	2010	Annals of Botany 105(3): 389-399.
Quercus semiserrata	SSR	0.68	0.77	Pakkad	2008	Forest Ecology and Management 255(3-4): 1067-1077.
Quercus serrata	SSR	0.801		Ohsawa	2008	Flora 203(3): 187-196.
Quercus sideroxyla	SSR	0.825		Penaloza-Ramirez	2010	Annals of Botany 105(3): 389-399.
Quercus variabilis	SSR	0.7762	0.8059	Xu	2004	Yi Chuan 26(5): 683-688.
Quercus wislizeni	AFLP		0.21	Dodd	2003	Theoretical and Applied Genetics 107(5): 884-892.
Ramonda myconi	RAPD	0.19	0.2587	Dubreuil	2008	American Journal of Botany 95(5): 577-587.
Ranunculus acris	AFLP	0.304		Odat	2004	Journal of Plant Ecology 3(1): 41-48.
Ranunculus alpestris	AFLP	0.07	0.13	Meirmans	2011	Molecular Ecology 20(15): 3144-3155.
Ranunculus bulbosus	AFLP	0.169		Hahn	2012	Plos One 7(8): e41608.
Ranunculus cabrerensis	ISSR		0.294	Cires	2013	Biologia 68(1): 30-40.
Ranunculus cabrerensis	AFLP		0.191	Cires	2013	Plant Systematics and Evolution 297(1-2): 75-85.
Raphanus sativus var. hortensis	SSR	0.549		Ohsako	2010	Breeding Science 60(3): 195-202.
Raphanus sativus var. hortensis f. raphanistroides	Allozyme	0.279		Huh	2001	Genes & Genetic Systems 76(1): 15-23.
Rauvolfia serpentina	ISSR		0.22	Pillai	2012	Biochemical Systematics and Ecology 40: 192-197.
Rhamnus persicifolia	ISSR	0.1105	0.2066	Bacchetta	2011	Biochemical Systematics and Ecology 39(4-6): 477-484.
Rheum officinale	ISSR	0.1008	0.3341	Wang	2012	International Journal of Molecular Sciences 13(3): 3900-3915.
Rheum palmatum	ISSR	0.1438	0.3107	Wang	2012	Plos One 7(12): e51667.
Rheum tanguticum	ISSR	0.1724	0.2689	Hu	2010	Biochemical Systematics and Ecology 38(3): 264-274.
Rheum tanguticum	SSR	0.515		Chen	2009	Biochemical Systematics and Ecology 37(5): 613-621.
Rhinanthus angustifolius	AFLP	0.068		Vrancken	2009	Biological Journal of the Linnean Society 98(1): 1-13.
Rhodiola dumulosa	AFLP	0.15	0.2473	Hou	2011	Plos One 6(9): e24497.
Rhodiola rosea	AFLP	0.217	0.341	Wang	2009	Zhongguo Zhong Yao Za Zhi 34(18): 2279-2284.
Rhododendron brachycarpum	Allozyme	0.075		Lee	2002	Silvae Genetica 51(5-6): 215-219.
Rhododendron ferrugineum	AFLP	0.11	0.21	Meirmans	2011	Molecular Ecology 20(15): 3144-3155.
Rhododendron mefternichii var. hondoense	SSR	0.716	0.758	Naito	1999	Journal of Plant Research 112(1108): 405-412.
Rhododendron ponticum	AFLP	0.112		Erfmeier	2011	International Journal of Plant Sciences 172(6): 795-806.
Rhododendron ripense	SSR		0.8	Kondo	2009	American Journal of Botany 96(8): 1532-1543.
Rhododendron simsii	AFLP	0.177	0.203	Li	2012	Journal of Systematics and Evolution 50(4): 362-373.
Rhus copallina	Allozyme	0.15	0.29	Shibayama	2008	Plant Species Biology 23(3): 212-216.
Rhus glabra	Allozyme	0.15	0.23	Shibayama	2008	Plant Species Biology 23(3): 212-216.
Rhus michauxii	Allozyme	0.08	0.08	Burke	2002	Journal of Heredity 93(1): 37-41.
Ricinus communis	AFLP		0.126	Allan	2008	Genetic Resources and Crop Evolution 55(3): 365-378.
Ricinus communis	SSR		0.239	Allan	2008	Genetic Resources and Crop Evolution 55(3): 365-378.
Ricotia lunaria	AFLP	0.24	0.35	Kossover	2009	Journal of Heredity 100(4): 432-440.
Rorippa amphibia (diplioid)	SSR	0.21		Luttikhuizen	2007	Molecular Ecology 16(17): 3544-3553.
Rosa persica	AFLP	0.159	0.371	Basaki	2009	Scientia Horticulturae 120(4): 538-543.
Rosmarinus officinalis	Allozyme	0.268		Zaouali	2012	Industrial Crops and Products 38: 166-176.
Rumex acetosa	AFLP	0.1753		Ye	2012	BMC Evolutionary Biology 12(1): 84.
Rumex acetosa	ISSR	0.1608		Ye	2012	BMC Evolutionary Biology 12(1): 84.
Rumex rothschildianus	AFLP	0.17		Rottenberg	2003	Biological Conservation 114(2): 299-303.
Rutidosis leptorrhynchoides	Allozyme	0.21	0.23	Young	1999	Heredity 80: 374-381.
Ryparosa kurrangii	AFLP	0.144	0.146	Griffin	2009	Biochemical Systematics and Ecology 37(4): 334-340.
Sagittaria latifolia	Allozyme	0.21		Dorken	2002	Evolution 56(1): 31-41.
Sagittaria lichuanensis	ISSR	0.009	0.025	Zhao	2010	Botanical Studies 51(3): 363-369.
Sagittaria natans	ISSR	0.074	0.15	Chen	2007	Aquatic Botany 87(1): 1-6.
Sagittaria natans	SSR	0.34	0.471	Yue	2011	Biochemical Systematics and Ecology 39(4-6): 412-418.
Sagittaria trifolia	ISSR	0.041	0.082	Chen	2007	Aquatic Botany 87(1): 1-6.
Saintpaulia ionantha ssp. grotei	ISSR	0.32		Kolehmainen	2008	Botanical Journal of the Linnean Society 157(2): 347-355.
Salix hukaoana	SSR	0.466		Kikuchi	2011	Conservation Genetics 12(1): 79-89.
Salix viminalis	RAPD		0.2932	Przyborowski	2010	Industrial Crops and Products 31(2): 395-400.
Salix viminalis	SSR	0.561		Trybush	2012	Bioenergy Research 5(4): 969-977.
Salvia miltiorrhiza	AFLP		0.2612	Wang	2007	Zhongguo Zhong Yao Za Zhi 32(19): 1988-1991.
Salvia miltiorrhiza	ISSR	0.1591	0.1951	Song	2010	Genetica 138(2): 241-249.
Sambucus palmensis	SSR	0.46	0.5	Sosa	2010	Conservation Genetics 11(6): 2357-2368.
Santalum austrocaledonicum	SSR	0.43	0.66	Bottin	2005	Molecular Ecology 14(7): 1979-1989.
Saponaria bellidifolia	AFLP	0.024		Csergo	2009	Plant Systematics and Evolution 278(1-2): 33-41.
Saponaria bellidifolia	RAPD	0.067	0.133	Csergo	2009	Plant Systematics and Evolution 278(1-2): 33-41.
Sarcanthus scolopendrifolius	Allozyme	0.002	0.015	Chung	2007	Biodiversity and Conservation 16(3): 775-786.
Sarracenia jonesii	Allozyme	0.061	0.086	Godt	1996	American Journal of Botany 83(8): 1016-1023.
Sarracenia leucophylla	Allozyme	0.183	0.224	Wang	2004	Journal of Heredity 95(3): 234-243.
Sarracenia oreophila	Allozyme	0.06	0.082	Godt	1996	American Journal of Botany 83(8): 1016-1023.
Sarracenia rubra ssp. alabamensis	Allozyme	0.187	0.209	Godt	1998	American Journal of Botany 85(6): 802-810.
Sarracenia rubra ssp. rubra	Allozyme	0.142	0.177	Godt	1998	American Journal of Botany 85(6): 802-810.
Saruma henryi	SSR	0.4441	0.9427	Zhou	2012	Biochemical Genetics 50(1-2): 146-158.
Saussurea chabyoungsanica	ISSR	0.173	0.352	Jeong	2012	Biochemical Systematics and Ecology 43: 14-24.
Saxifraga callosa	AFLP	0.06		Grassi	2009	Journal of Plant Research 122(4): 377-87.
Saxifraga florulenta	AFLP	0.069		Szovenyi	2009	Taxon 58(2): 532-543.
Saxifraga oppositifolia	AFLP	0.121		Kropf	2008	Plant Ecology and Diversity 1 (2): 217-228.
Saxifraga rivularis	AFLP	0.052		Westergaard	2010	Journal of Biogeography 37(7): 1262-1276.
Saxifraga stellaris	AFLP	0.06	0.12	Meirmans	2011	Molecular Ecology 20(15): 3144-3155.
Saxifraga tridactylites	AFLP	0.17		Reisch	2007	Conservation Genetics 8(4): 893-902.
Scabiosa canescens	Allozyme	0.273		Waldmann	1998	Heredity 81: 79-86.
Scabiosa columbaria	Allozyme	0.303		Waldmann	1998	Heredity 81: 79-86.
Scabiosa columbaria	RAPD	0.18		Pluess	2004	Conservation Genetics 5(2): 145-156.
Schisandra chinensis	SSR	0.677	0.779	Sun	2011	Genetica 139(4): 497-503.
Schisandra chinensis	ISSR	0.2409	0.2894	Sun	2010	Biochemical Systematics and Ecology 38(3): 257-263.
Schisandra sphenanthera	ISSR	0.222	0.2782	Sun	2010	Biochemical Systematics and Ecology 38(3): 257-263.
Schisandra sphenanthera	SSR	0.68	0.759	Sun	2011	Genetica 139(4): 497-503.
Schwalbea americana	Allozyme	0.005	0.006	Godt	1998	Journal of Heredity 89(1): 89-93.
Sclerolaena diacantha	Allozyme	0.234		Peakall	1995	Heredity 75: 351-361.
Scutellaria baicalensis	ISSR		0.2819	Bai	2010	Zhong Yao Cai 33(11): 1689-1694.
Scutellaria indica	Allozyme	0.008	0.101	Sun	1999	Molecular Ecology 8(8): 1285-1295.
Scutellaria indica	RAPD	0.034	0.139	Sun	1999	Molecular Ecology 8(8): 1285-1295.
Secale cereale	Allozyme	0.223	0.25	Persson	2002	Hereditas 136(1): 29-38.
Sedum alfredii	RAPD	0.1407		Deng	2007	Plant and Soil 297(1-2): 83-92.
Sedum ussuriense	RAPD	0.182		Ku	2011	Journal of Plant Biology 54(4): 262-268.
Senecio carbonensis	Allozyme	0.332	0.341	Fernandez	2011	Plant Species Biology 26(2): 145-157.
Senecio gallicus	Allozyme	0.149		Comes	1998	Evolution 52(2): 355-367.
Senecio glaucus	Allozyme	0.294		Comes	1999	Evolution 53(1): 36-54.
Senecio madagascariensis	SSR	0.79		Roux	2010	Biological Invasions 12(7): 2251-2264.
Senecio peteroanus	Allozyme	0.295	0.3	Fernandez	2011	Plant Species Biology 26(2): 145-157.
Senecio vernalis	Allozyme	0.288		Comes	1999	Evolution 53(1): 36-54.
Serapias vomeracea	SSR	0.57		Pellegrino	2006	Folia Geobotanica 41(1): 21-32.
Sesamum indicum	RAPD	0.17	0.33	Pham	2011	Hereditas 148(1): 28-35.
Seseli farrenyi	Allozyme	0.297	0.31	Lopez-Pujol	2002	Botanical Journal of the Linnean Society 138(3): 305-314.
Sesleria caerulea	AFLP	0.2	0.3	Meirmans	2011	Molecular Ecology 20(15): 3144-3155.
Sextonia rubra	SSR		0.828	Veron	2005	Silvae Genetica 54(6): 275-280.
Shorea curtisii	SSR	0.79		Ng	2006	Tree Genetics & Genomes 2(3): 121-131.
Shorea leprosula	SSR	0.75		Ng	2006	Tree Genetics & Genomes 2(3): 121-131.
Shorea macroptera	SSR	0.72		Ng	2006	Tree Genetics & Genomes 2(3): 121-131.
Shorea ovalis ssp. sericea	SSR	0.64		Ng	2004	Molecular Ecology 13(3): 657-669.
Shorea xanthophylla	SSR		0.662	Kettle	2011	Perspectives in Plant Ecology Evolution and Systematics 13(1): 45-54.
Shortia rotundifolia	SSR	0.488		Dan	2009	Conservation Genetics 10(4): 859-867.
Sibbaldiopsis tridentata	AFLP	0.249		Bresowar	2011	Castanea 76(2): 210-221.
Sicyos angulatus	ISSR	0.1595	0.1684	Kurokawa	2009	Weed Research 49(4): 365-372.
Silene chlorantha	AFLP	0.1923		Lauterbach	2011	Plant Biology 13(4): 667-677.
Silene dioica	Allozyme	0.278	0.344	Malm	2002	Biological Journal of the Linnean Society 77(1): 23-34.
Silene hifacensis	Allozyme	0.085	0.203	Prentice	2003	Conservation Genetics 4(5): 543-555.
Silene latifolia	Allozyme	0.5		Richards	2003	Heredity 90(2): 181-186.
Silene latifolia	SSR	0.89		Barluenga	2011	Heredity 106(1): 13-24.
Silene nutans	Allozyme	0.196		Van Rossum	2004	Biological Journal of the Linnean Society 81(3): 357-371.
Silene otites	AFLP	0.202		Lauterbach	2012	Plant Systematics and Evolution 298(1): 155-164.
Silene rupestris	AFLP	0.108		Kropf	2006	New Phytologist 172(1): 169-184.
Silene sennenii	Allozyme	0.071		Lopez-Pujol	2007	Conservation Genetics 8(4): 903-912.
Silene tatarica	AFLP	0.127		Tero	2003	Molecular Ecology 12(8): 2073-2085.
Sinocalycanthus chinensis	ISSR	0.0839	0.1987	Jin	2007	Ying Yong Sheng Tai Xue Bao 18(2): 247-253.
Sinocalycanthus chinensis	RAPD	0.0578	0.2421	Li	2006	Biochemical Systematics and Ecology 34(10): 725-735.
Sinojackia dolichocarpa	ISSR	0.1267	0.2255	Cao	2006	Biochemical Systematics and Ecology 34(3): 231-239.
Sinojackia rehderiana	SSR		0.785	Yao	2011	Plant Biology 13(2): 401-410.
Sinojackia xylocarpa	SSR	0.591		Zhang	2010	Biochemical Systematics and Ecology 38(2): 154-159.
Sinopodophyllum hexandrum	AFLP	0.035	0.052	Li	2011	Molecular Phylogenetics and Evolution 59(2): 412-424.
Sisymbrium austriacum	AFLP	0.3424	0.3791	Jacquemyn	2006	Heredity 96(6): 471-478.
Sisyrinchium micranthum	ISSR	0.24		Tacuatia	2012	Genetics and Molecular Biology 35(1): 99-105.
Solanum commersonii	AFLP		0.35	Siri	2009	Euphytica 165(2): 371-382.
Solanum commersonii	RAPD		0.33	Siri	2009	Euphytica 165(2): 371-382.
Solanum commersonii	SSR		0.64	Siri	2009	Euphytica 165(2): 371-382.
Solanum melongena	AFLP		0.0445	Munoz-Falcon	2009	Journal of the Science of Food and Agriculture 89(2): 320-328.
Solidago canadensis	SSR		0.619	Alexander	2009	Diversity and Distributions 15(3): 502-512.
Sonchus gandogeri	AFLP	0.323	0.38	Kim	2005	Theoretical and Applied Genetics 106(6): 1004-1010.
Sophora moorcroftiana	Allozyme	0.122	0.15	Liu	2006	Plant Biology 8(1): 81-92.
Sophronitis sincorana	Allozyme	0.42		Borba	2007	Plant Systematics and Evolution 267(1-4): 129-146.
Sorbus aucuparia	Allozyme	0.163	0.195	Bacles	2004	Molecular Ecology 13(3): 573-584.
Sorghum bicolor	SSR		0.53	Ng'uni	2011	Hereditas 148(2): 52-62.
Sorghum bicolor (domesticated)	Allozyme		0.093	Morden	1989	American Journal of Botany 76(2): 247-255.
Spartina alterniflora	AFLP	0.2	0.22	Utomo	2009	Aquatic Botany 90(1): 30-36.
Spartina alterniflora	SSR	0.64		Novy	2010	Wetlands 30(3): 603-608.
Spiraea virginiana	SSR	0.391		Brzyski	2011	Conservation Genetics 12(5): 1323-1332.
Spondias purpurea (domesticated)	AFLP	0.0858	0.1694	Miller	2006	Molecular Ecology 15(6): 1467-1480.
Spondias purpurea (wild)	AFLP	0.1102	0.1867	Miller	2006	Molecular Ecology 15(6): 1467-1480.
Stachys maritima	Allozyme	0.066	0.099	Lopez-Pujol	2003	Plant Biology 5(5): 504-512.
Stenocereus eruca	RAPD	0.277		Clark-Tapia	2005	American Journal of Botany 92(2): 272-278.
Stenocereus griseus	Allozyme	0.161	0.182	Nassar	2003	American Journal of Botany 90(11): 1628-1637.
Stenocereus pruinosus (domesticated)	SSR	0.7		Parra	2010	Annals of Botany 106(3): 483-496.
Stenocereus pruinosus (wild)	SSR	0.72		Parra	2010	Annals of Botany 106(3): 483-496.
Stenocereus stellatus	Allozyme	0.264		Casas	2006	Biodiversity and Conservation 15(3): 879-898.
Stipa capillata	AFLP	0.082		Wagner	2011	American Journal of Botany 98(7): 1173-1179.
Stipa krylovii	ISSR	0.23	0.26	Zheng	2009	Canadian Journal of Plant Science 89(5): 875-882.
Stipa krylovii	RAPD	0.1622	0.2392	Wang	2006	Genetika 42(5): 587-594.
Stipa purpurea	ISSR	0.1354	0.2204	Liu	2009	Annals of Applied Biology 154(1): 57-65.
Stipa tenacissima	ISSR	0.171	0.2402	Boussaid	2010	Biochemical Genetics 48(9-10): 857-872.
Streptocarpus primulifolius	SSR	0.5		Hughes	2005	Molecular Ecology 14(14): 4415-4426.
Streptocarpus rexii	SSR	0.09		Hughes	2005	Molecular Ecology 14(14): 4415-4426.
Stryphnodendron adstringens	AFLP	0.13		De Mendonca	2012	Biochemical Systematics and Ecology 41: 16-20.
Suaeda maritima	AFLP	0.079		Prinz	2009	Plant Biology 11(6):812-820.
Suaeda salsa	Allozyme	0.18		Song	2007	Russian Journal of Ecology 38(4): 277-284.
Succisa pratensis	Allozyme	0.18		Hooftman	2004	Conservation Biology 18(4): 1043-1051.
Suzukia luchuensis	Allozyme	0.031	0.232	Maki	2003	Heredity 91(3): 300-306.
Swertia perennis	Allozyme	0.139		Lienert	2002	American Journal of Botany 89(5): 801-811.
Swietenia macrophylla	AFLP	0.1079	0.1472	Lowe	2003	Heredity 90(3): 268-275.
Swietenia macrophylla	SSR	0.781	0.851	Lemes	2003	Molecular Ecology 12(11): 2875-2883.
Symphonia globulifera	SSR		0.854	Aldrich	1998	Molecular Ecology 7(8): 933-944.
Symphyotrichum laurentianum	Allozyme	0.049	0.054	Heard	2009	Botany 87(11): 1089-1095.
Symplocos laurina	ISSR	0.153	0.238	Deshpande	2001	Molecular Ecology 10(10): 2397-2408.
Syzygium nervosum	Allozyme	0.307		Shapcott	1998	Journal of Tropical Ecology 14: 595-614.
Tabebuia aurea	SSR		0.947	Braga	2011	Heredity 106(6): 911-919.
Tabebuia ochracea	SSR	0.439		Moreira	2009	Forest Ecology and Management 258(12): 2690-2695.
Tabebuia roseo-alba	SSR	0.798		Feres	2012	Conservation Genetics 13(2): 393-405.
Tacca chantrieri	ISSR	0.165	0.264	Zhang	2006	Annals of Botany 98(2): 449-457.
Taiwania cryptomerioides	ISSR	0.035	0.1282	Li	2008	Silvae Genetica 57(4-5): 242-249.
Tamarix chinensis	ISSR	0.19	0.239	Jiang	2012	Plant Systematics and Evolution 298(1): 147-153.
Tamarix ramosissima	AFLP	0.27		Vonlanthen	2010	American Journal of Botany 97(2): 234-242.
Taxus baccata	Allozyme	0.274	0.292	Klumpp	2011	Scandinavian Journal of Forest Research 26(4): 294-304.
Taxus baccata	SSR	0.655	0.773	Gonzalez-Martinez	2010	Molecular Phylogenetics and Evolution 55(3): 805-815.
Taxus cuspidata	Allozyme	0.192		Chung	1999	Scandinavian Journal of Forest Research 14(2): 103-110.
Taxus fuana	RAPD	0.1165	0.2812	Shah	2008	Biochemical Systematics and Ecology 36(3): 183-193.
Taxus wallichiana var. mairei	ISSR	0.2071	0.3467	Zhang	2009	Canadian Journal of Forest Research 39(4): 755-764.
Terminalia franchetii	AFLP	0.127	0.168	Zhang	2011	Journal of Plant Research 124(1): 63-73.
Tetraena mongolica	ISSR	0.177	0.213	Ge	2003	Biological Conservation 111(3): 427-434.
Tetratheca paynterae ssp. paynterae	SSR	0.611	0.677	Butcher	2009	Conservation Genetics 10(6): 1735-1746.
Theobroma cacao	SSR		0.477	Silva	2011	Heredity 106(6): 973-985.
Thlaspi caerulescens	SSR	0.57		Jimenez-Ambriz	2007	New Phytologist 173(1): 199-215.
Thuja occidentalis	SSR	0.611	0.663	Pandey	2012	American Journal of Botany 99(4): 690-699.
Thymus daenensis ssp. daenensis	ISSR	0.325		Rahimmalek	2009	Biochemical Genetics 47(11-12): 831-842.
Thymus vulgaris	Allozyme	0.321	0.343	Tarayre	1997	Journal of Evolutionary Biology 10(2): 157-174.
Tillandsia achyrostachys	Allozyme	0.2105		Gonzalez-Astorga	2004	Annals of Botany 94(4): 545-551.
Tithonia diversifolia	ISSR	0.2937	0.3626	Yang	2012	Weed Science 60(4): 552-557.
Torreya jackii	ISSR	0.08	0.21	Li	2007	Plant Science 172(5): 1048-1053.
Torreya jackii	RAPD	0.0813	0.2015	Li	2007	Ying Yong Sheng Tai Xue Bao 18(12): 2661-2667.
Tradescantia hirsuticaulis	Allozyme	0.157	0.206	Godt	1993	American Journal of Botany 80(8): 959-966.
Triadica sebifera	SSR	0.7		Dewalt	2011	American Journal of Botany 98(7): 1128-1138.
Tribulus terrestris	AFLP		0.26	Sarwat	2008	Plant Cell Reports 27(3): 519-528.
Tribulus terrestris	ISSR		0.31	Sarwat	2008	Plant Cell Reports 27(3): 519-528.
Tribulus terrestris	RAPD		0.25	Sarwat	2008	Plant Cell Reports 27(3): 519-528.
Tricyrtis ishiiana	SSR	0.704	0.714	Setoguchi	2011	Conservation Genetics 12(2): 491-501.
Trifolium alpinum	AFLP	0.15	0.24	Meirmans	2011	Molecular Ecology 20(15): 3144-3155.
Trifolium glomeratum	AFLP	0.235		Bennett	2003	Plant Breeding 122(4): 362-367.
Trifolium montanum	AFLP	0.235		Hahn	2012	Plos One 7(8): e41608.
Trifolium nigrescens	AFLP	0.325		Bennett	2003	Plant Breeding 122(4): 362-367.
Trifolium pratense	RAPD	0.19		Ulloa	2003	Genome 46(4): 529-535.
Trifolium pratense	SSR	0.649		Dias	2008	Euphytica 160(2): 189-205.
Trifolium repens	AFLP	0.107		Hargreaves	2010	Conservation Genetics 11(4): 1317-1326.
Trigonella caerulea	ISSR		0.33	Dangi	2004	BMC Plant Biology 4: 13.
Trigonella caerulea	RAPD		0.346	Dangi	2004	BMC Plant Biology 4: 13.
Trigonella foenum-graecum	ISSR		0.2145	Dangi	2004	BMC Plant Biology 4: 13.
Trigonella foenum-graecum	RAPD		0.203	Dangi	2004	BMC Plant Biology 4: 13.
Trigonobalanus doichangensis	RAPD	0.079	0.16	Sun	2007	Australian Journal of Botany 55(1): 10-17.
Trigonobalanus verticillata	AFLP	0.153	0.198	Kamiya	2002	Genes & Genetic Systems 77(3): 177-86.
Trillium camschatcense	Allozyme	0.083	0.095	Tomimatsu	2003	Biological Conservation 109(2): 249-258.
Trillium erectum	Allozyme	0.13		Griffin	2004	Canadian Journal of Botany 82(3): 316-321.
Trillium kamtschaticum	Allozyme	0.034	0.051	Ohara	1996	Heredity 76: 476-484.
Trillium reliquum	Allozyme	0.069	0.12	Gonzales	2005	Heredity 95(4): 306-314.
Tripodion tetraphyllum	ISSR	0.27		Bellucci	2010	Plant Biology 13(2): 381-390.
Triticum aestivum	SSR	0.57		Rousselle	2011	Heredity 106(2): 289-299.
Triticum dicoccoides	Allozyme	0.109	0.212	Sela	2009	Genome 52(6): 557-565.
Triticum dicoccoides	SSR	0.5		Fahima	2002	Theoretical and Applied Genetics 104(1):17–29
Triticum turgidum ssp. dicoccoides	AFLP	0.156		Ozbek	2007	Genetic Resources and Crop Evolution 54(7): 1587-1598.
Triticum turgidum ssp. dicoccoides	SSR	0.55		Peleg	2008	Genome 51(3): 187-195.
Trollius europaeus	AFLP	0.309		Klank	2012	Conservation Genetics 13(3): 873-884.
Tuctoria greenei	SSR	0.79		Gordon	2012	Conservation Genetics 13(1): 117-130.
Typha angustifolia	SSR	0.49	0.66	Tsyusko	2005	American Journal of Botany 92(7): 1161-1169.
Typha latifolia	SSR	0.29	0.37	Tsyusko	2005	American Journal of Botany 92(7): 1161-1169.
Typha minima	AFLP	0.063	0.129	Till-Bottraud	2010	Botanica Helvetica 120(1): 53-62.
Ulmus pumila	SSR		0.5	Zalapa	2008	Genome 51(7): 492-500.
Uniola paniculata	Allozyme	0.068	0.151	Franks	2004	American Journal of Botany 91(9): 1345-1351.
Urtica dioica	Allozyme	0.52		Mutikainen	2002	Heredity 89: 318-324.
Vaccinium uliginosum	Allozyme	0.082	0.152	Alsos	2002	Arctic Antarctic and Alpine Research 34(4): 408-418.
Valeriana jatamansi	AFLP	0.296		Rajkumar	2011	Biochemical Genetics 49 (9-10): 674-681.
Vallisneria americana	Allozyme	0.3297	0.3403	Lokker	1994	American Journal of Botany 81(8): 1004-1012.
Vallisneria americana	SSR	0.53	0.602	Lloyd	2011	Conservation Genetics 12(5): 1269-1285.
Vallisneria spinulosa	Allozyme	0.21	0.23	Chen	2007	Aquatic Botany 86(1): 46-52.
Vateriopsis seychellarum	SSR	0.56		Finger	2012	Molecular Ecology 21(10): 2369-2382.
Vella pseudocytisus ssp. paui	AFLP	0.557	0.581	Perez-Collazos	2006	Annals of Botany 97(4): 635-647.
Vellozia epidendroides	Allozyme	0.404	0.464	Franceschinelli	2006	Annals of Botany 97(4): 585-592.
Vellozia gigantea	ISSR	0.183	0.256	Lousada	2011	Genetica 139(4): 431-440.
Vellozia leptopetala	Allozyme	0.213	0.225	Franceschinelli	2006	Annals of Botany 97(4): 585-592.
Veratrum album ssp. oxysepalum	SSR	0.827		Kikuchi	2013	Biological Journal of the Linnean Society 108(2): 278-293.
Veratrum stamineum	SSR	0.866		Kikuchi	2013	Biological Journal of the Linnean Society 108(2): 278-293.
Vernicia fordii	ISSR		0.177	Li	2008	African Journal of Biotechnology 7(8): 1054-1059.
Veronica alpine	AFLP		0.069	Albach	2006	Molecular Ecology 15(11): 3269-3286.
Veronica bellidioides	AFLP		0.055	Albach	2006	Molecular Ecology 15(11): 3269-3286.
Veronica chamaedrys	AFLP	0.16		Kloss	2011	Basic and Applied Ecology 12(5): 440-448.
Verticordia staminosa	Allozyme	0.023		Yates	2007	Australian Journal of Botany 55(3): 194-205.
Vicia faba	ISSR	0.2344		Wang	2012	Theoretical and Applied Genetics 124(5): 789-797.
Vicia ramuliflora	ISSR	0.1422	0.1807	Han	2010	Biochemical Genetics 48(5-6): 385-401.
Vicia ramuliflora	RAPD	0.1017	0.1289	Han	2010	Plant Systematics and Evolution 279(1-4): 59-68.
Vicia unijuga	ISSR	0.1495	0.1951	Han	2010	Biochemical Genetics 48(5-6): 385-401.
Vicia unijuga	RAPD	0.148	0.1832	Han	2010	Plant Systematics and Evolution 279(1-4): 59-68.
Vigna subterranea	SSR		0.552	Somta	2011	Genome 54(11): 898-910.
Vigna unguiculata ssp. unguiculata	AFLP	0.154	0.347	Tosti	2005	Theoretical and Applied Genetics 110(7): 1275-1283.
Viola calaminaria	RAPD	0.25	0.32	Bizoux	2008	Plant Biology 10(6): 684-693.
Viola chaerophylloides var. sieboldiana	AFLP	0.098	0.221	Toyama	2009	Journal of Plant Research 122(4): 389-401.
Viola eizanensis	AFLP	0.088	0.207	Toyama	2009	Journal of Plant Research 122(4): 389-401.
Viola elatior	AFLP	0.1136		Eckstein	2006	Molecular Ecology 15(9): 2367-2379.
Viola grayi	SSR	0.143		Hirai	2012	Conservation Genetics 13(3): 837-848.
Viola grypoceras	SSR	0.656		Hirai	2012	Conservation Genetics 13(3): 837-848.
Viola kusanoana	SSR	0.384		Hirai	2012	Conservation Genetics 13(3): 837-848.
Viola pubescens	Allozyme	0.32	0.32	Culley	2001	Heredity 86: 545-556.
Viola pumila	AFLP	0.1521		Eckstein	2006	Molecular Ecology 15(9): 2367-2379.
Viola stagnina	AFLP	0.1267		Eckstein	2006	Molecular Ecology 15(9): 2367-2379.
Viola tricolor	ISSR	0.1242	0.1694	Slomka	2011	Chemosphere 83(4): 435-442.
Viscum album	AFLP	0.18		Stanton	2009	Plant Systematics and Evolution 281(1-4): 161-169.
Vitellaria paradoxa	RAPD	0.2	0.26	Fontaine	2004	Heredity 93(6): 639-648.
Vitellaria paradoxa	SSR	0.51		Allal	2011	Heredity 107(2): 174-86.
Vitex negundo	RAPD	0.25		Zhang	2007	Biochemical Systematics and Ecology 35(8): 506-516.
Vitex rotundifolia	Allozyme	0.047	0.066	Yeeh	1996	Journal of Plant Research 109(1094): 161-168.
Vitex rotundifolia	ISSR	0.086	0.19	Hu	2008	Journal of Integrative Plant Biology 50(9): 1118-1129.
Vitis vinifera	SSR	0.7	0.826	Aradhya	2003	Genetical Research 81(3): 179-192.
Voanioala gerardii	SSR	0.608		Shapcott	2012	Conservation Genetics 13(5): 1393-1408.
Vouacapoua americana	SSR	0.506		Dutech	2004	Heredity 92(2): 69-77.
Vriesea gigantea	SSR	0.579	0.714	Palma-Silva	2009	Heredity 103(6): 503-512.
Wyethia bolander	Allozyme	0.35	0.37	Ayres	1999	American Journal of Botany 86(3): 344-353.
Wyethia reticulata	Allozyme	0.24	0.28	Ayres	1999	American Journal of Botany 86(3): 344-353.
Xanthosoma sagittifolium	RAPD		0.319	Offei	2004	Hereditas 140(2): 123-128.
Ypsilandra thibetica	SSR	0.615		Li	2011	Biochemical Systematics and Ecology 39(4-6): 425-433.
Zanthoxylum ailanthoides	SSR	0.596	0.714	Yoshida	2010	Journal of Plant Research 123(4): 607-616.
Zea diploperennis	Allozyme	0.231	0.292	Doebley	1984	Systematic Botany 9(2): 203-218.
Zea diploperennis	SSR		0.65	Fukunaga	2005	Genetics 169(4): 2241-2254.
Zea luxurians	Allozyme	0.11	0.155	Doebley	1984	Systematic Botany 9(2): 203-218.
Zea luxurians	SSR		0.73	Fukunaga	2005	Genetics 169(4): 2241-2254.
Zea mays ssp. huehuetenangensis	SSR		0.72	Fukunaga	2005	Genetics 169(4): 2241-2254.
Zea mays ssp. mays	Allozyme	0.229	0.311	Doebley	1984	Systematic Botany 9(2): 203-218.
Zea mays ssp. mexicana	SSR		0.85	Fukunaga	2005	Genetics 169(4): 2241-2254.
Zea mays ssp. parviglumis	SSR		0.89	Fukunaga	2005	Genetics 169(4): 2241-2254.
Zeuxine gracilis	Allozyme	0.01	0.015	Sun	2001	American Journal of Botany 88(12): 2180-2188.
Zeuxine gracilis	RAPD	0.076	0.165	Sun	2001	American Journal of Botany 88(12): 2180-2188.
Zeuxine strateumatica	RAPD	0.011	0.144	Sun	2001	American Journal of Botany 88(12): 2180-2188.
Zingiber zerumbet	AFLP	0.2738		Kavitha	2008	Euphytica 160(1): 89-100.
Zizania latifolia	SSR	0.61		Chen	2012	Annals of Applied Biology 161(2): 192-201.
Zizania palustris var. palustris	Allozyme	0.15		Lu	2005	American Journal of Botany 92(6): 990-997.
Ziziphus celata	SSR	0.39		Gitzendanner	2012	Conservation Genetics 13(1): 223-234.
Zostera marina	SSR	0.46		Olsen	2004	Molecular Ecology 13(7): 1923-1941.
Zostera noltii	SSR	0.602		Ruggiero	2005	Evolutionary Ecology 19(5): 487-499.

## Sheet: Table S2
Table S2 Summary of the entry numbers, the mean, minimum and maximum values of the population-level (Hs) and species-level (Ht) expected heterozygosity derived by the five markers.
He	N	mean	min	max
AFLP_Hs	247	0.162	0.0014	0.716
AFLP_Ht	193	0.226	0.0035	0.744
Allozyme_Hs	414	0.173	0.00012	0.836
Allozyme_Ht	296	0.198	0.00012	0.86
ISSR_Hs	145	0.159	0.009	0.415
ISSR_Ht	149	0.235	0.025	0.505
RAPD_Hs	136	0.182	0.011	0.49
RAPD_Ht	119	0.246	0.005	0.496
SSR_Hs	260	0.55	0.023	0.89
SSR_Ht	198	0.643	0.17	0.977

## Sheet: Table S3
Table S3 Summary of the original records of the nucleotide diversity (π) estimates.
Taxon	π	Author	Year	Reference
Capsicum annuum (domesticated)	0.00274	Aguilar-Melendez	2009	American Journal of Botany 96(6): 1190-1202.
Capsicum annuum (wild)	0.00255	Aguilar-Melendez	2009	American Journal of Botany 96(6): 1190-1202.
Oryza australiensis	0.0044	Ai	2012	Evolution 66(10): 3302-3310.
Oryza barthii	0.0021	Ai	2012	Evolution 66(10): 3302-3310.
Oryza brachyantha	0.0033	Ai	2012	Evolution 66(10): 3302-3310.
Oryza eichingeri	0.0073	Ai	2012	Evolution 66(10): 3302-3310.
Oryza granulata	0.0032	Ai	2012	Evolution 66(10): 3302-3310.
Oryza nivara	0.0054	Ai	2012	Evolution 66(10): 3302-3310.
Oryza officinalis	0.005	Ai	2012	Evolution 66(10): 3302-3310.
Oryza punctata	0.0011	Ai	2012	Evolution 66(10): 3302-3310.
Oryza rhizomatis	0.0063	Ai	2012	Evolution 66(10): 3302-3310.
Lens culinaris ssp. culinaris	0.00391	Alo	2011	Journal of Heredity 102(3): 315-329.
Lens culinaris ssp. orientalis	0.00674	Alo	2011	Journal of Heredity 102(3): 315-329.
Lycopersicon chilense	0.0201	Arunyawat	2007	Molecular Biology and Evolution 24(10): 2310-2322.
Lycopersicon peruvianum	0.024	Arunyawat	2007	Molecular Biology and Evolution 24(10): 2310-2322.
Salix schwerinii	0.00849	Berlin	2011	G3 1(5): 387-400.
Salix viminalis	0.00655	Berlin	2011	G3 1(5): 387-400.
Phaseolus vulgaris	0.0099	Bitocchi	2012	Proceedings of the National Academy of Sciences, USA 109(14): E788-E796.
Pinus taeda	0.0064	Brown	2004	Proceedings of the National Academy of Sciences, USA 101(42): 15255-15260.
Oryza rufipogon	0.00519	Caicedo	2007	Plos Genetics 3(9): 1745-1756.
Oryza sativa	0.0032	Caicedo	2007	Plos Genetics 3(9): 1745-1756.
Hordeum spontaneum	0.01673	Caldwell	2006	Genetics 172(1): 557-567.
Hordeum vulgare	0.00473	Caldwell	2006	Genetics 172(1): 557-567.
Persea americana (wild)	0.0102	Chen	2008	Journal of Heredity 99(4): 382-389.
Picea abies	0.00709	Chen	2010	Heredity 104(1): 3-14.
Picea breweriana	0.00204444	Chen	2010	Heredity 104(1): 3-14.
Picea glauca	0.00863333	Chen	2010	Heredity 104(1): 3-14.
Picea mariana	0.00422222	Chen	2010	Heredity 104(1): 3-14.
Pennisetum glaucum (domesticated)	0.00437	Clotault	2012	Molecular Biology and Evolution 29(4): 1199-1212.
Pennisetum glaucum (wild)	0.00741	Clotault	2012	Molecular Biology and Evolution 29(4): 1199-1212.
Medicago truncatula	0.003409	De Mita	2011	BMC Evolutionary Biology 11: 229.
Pseudotsuga menziesii	0.00756	Eckert	2009	Genetics 183(1): 289-298.
Capsella rubella	0.0067	Foxe	2009	Proceedings of the National Academy of Sciences, USA 106(13): 5241-5245.
Populus trichocarpa	0.0029	Gilchrist	2006	Molecular Ecology 15(5): 1367-1378.
Sorghum bicolor	0.0022	Hamblin	2006	Genetics 173(2): 953-964.
Triticum turgidum ssp. dicoccoides	0.0036	Haudry	2007	Molecular Biology and Evolution 24(7): 1506-1517.
Triticum turgidum ssp. dicoccum	0.0012	Haudry	2007	Molecular Biology and Evolution 24(7): 1506-1517.
Glycine max	0.00177	Hyten	2006	Proceedings of the National Academy of Sciences, USA 103(45): 16666-16671.
Glycine soja	0.00276	Hyten	2006	Proceedings of the National Academy of Sciences, USA 103(45): 16666-16671.
Cardamine nipponica	0.00178	Ikeda	2009	Genetics 182(2): 603-614.
Populus tremula	0.0042	Ingvarsson	2008	Genetics 180(1): 329-340.
Cryptomeria japonica	0.00383	Kado	2003	Genetics 164(4): 1547-1559.
Populus balsamifera	0.0019	Keller	2011	Genetics 188(4): 941-U318.
Lycopersicon esculentum (domesticated)	0.0013	Labate	2009	Heredity 103(3): 257-267.
Oryza glaberrima	0.0006	Li	2011	Theoretical and Applied Genetics 123(1): 21-31.
Secale cereale	0.0056	Li	2011	BMC Plant Biology 11: 6.
Juniperus convallium	0.00211	Li	2012	Evolution 66(3): 831-845.
Juniperus przewalskii	0.00383	Li	2012	Evolution 66(3): 831-845.
Juniperus saltuaria	0.00415	Li	2012	Evolution 66(3): 831-845.
Juniperus tibetica	0.00292	Li	2012	Evolution 66(3): 831-845.
Helianthus annuus (domesticated)	0.0096	Liu	2006	Genetics 173(1): 321-330.
Helianthus annuus (wild)	0.0234	Liu	2006	Genetics 173(1): 321-330.
Pinus densata	0.0122	Ma	2006	Molecular Biology and Evolution 23(4): 807-816.
Pinus tabuliformis	0.0119	Ma	2006	Molecular Biology and Evolution 23(4): 807-816.
Pinus yunnanensis	0.0095	Ma	2006	Molecular Biology and Evolution 23(4): 807-816.
Abies alba	0.0061	Mosca	2012	Evolutionary Applications 5(7): 762-775.
Larix decidua	0.0047	Mosca	2012	Evolutionary Applications 5(7): 762-775.
Pinus cembra	0.0013	Mosca	2012	Evolutionary Applications 5(7): 762-775.
Pinus mugo	0.0067	Mosca	2012	Evolutionary Applications 5(7): 762-775.
Eichhornia paniculata	0.0064	Ness	2010	Genetics 184(2): 381-U105.
Brassica rapa	0.00917	Park	2010	Molecular Genetics and Genomics 283(2): 135-145.
Pinus pinaster	0.00241	Pot	2005	New Phytologist 167(1): 101-112.
Pinus radiata	0.00186	Pot	2005	New Phytologist 167(1): 101-112.
Quercus petraea	0.00722	Pot	2005	New Phytologist 167(1): 101-112.
Arabidopsis halleri	0.015	Ramos-Onsins	2004	Genetics 166(1): 373-388.
Lycopersicon chmielewskii	0.00027	Roselius	2005	Genetics 171(2): 753-763.
Lycopersicon pimpinellifolium	0.0016	Roselius	2005	Genetics 171(2): 753-763.
Arabidopsis lyrata	0.0225	Ross-Ibarra	2008	Plos One 3(6): e2411.
Zea luxurians	0.01	Ross-Ibarra	2009	Genetics 181(4): 1397-1409.
Zea mays ssp. mays	0.013	Ross-Ibarra	2009	Genetics 181(4): 1397-1409.
Zea mays ssp. mexicana	0.016	Ross-Ibarra	2009	Genetics 181(4): 1397-1409.
Zea mays ssp. parviglumis	0.017	Ross-Ibarra	2009	Genetics 181(4): 1397-1409.
Arabidopsis thaliana	0.0083	Schmid	2005	Genetics 169(3): 1601-1615.
Capsella grandiflora	0.023	Slotte	2010	Molecular Biology and Evolution 27(8): 1813-1821.
Boechera stricta	0.003	Song	2009	Genetics 181(3): 1021-1033.
Lycopersicon hirsutum	0.0089	Stadler	2005	Evolution 59(6): 1268-1279.
Helianthus petiolaris	0.03318	Strasburg	2008	Evolution 62(8): 1936-1950.
Zea diploperennis	0.0113	Tiffin	2001	Genetics 158(1): 401-412.
Zea perennis	0.014	Tiffin	2001	Genetics 158(1): 401-412.
Pinus sylvestris	0.0117	Wachowiak	2011	Heredity 106(5): 775-787.
Lolium perenne	0.0314	Xing	2007	BMC Plant Biology 7: 43.

## Sheet: Table S4
Table S4 Summary of the taxon list of each marker pair for correlation analysis.
Marker pair	Taxon
Sequence/AFLP
	Arabidopsis thaliana
	Brassica rapa
	Hordeum spontaneum
	Phaseolus vulgaris
	Pinus pinaster
	Triticum turgidum ssp. dicoccoides
Sequence/Allozyme
	Abies alba
	Arabidopsis lyrata *
	Arabidopsis thaliana
	Brassica rapa
	Cryptomeria japonica
	Eichhornia paniculata
	Glycine max
	Glycine soja
	Helianthus annuus (domesticated)
	Helianthus annuus (wild) *
	Helianthus petiolaris *
	Hordeum spontaneum *
	Hordeum vulgare
	Larix decidua
	Lens culinaris (domesticated)
	Lens culinaris (wild)
	Lolium perenne
	Medicago truncatula
	Oryza granulata
	Oryza officinalis
	Oryza rufipogon
	Oryza sativa *
	Pennisetum glaucum (domesticated)
	Phaseolus vulgaris
	Picea abies
	Picea breweriana
	Picea glauca
	Picea mariana
	Pinus cembra
	Pinus densata
	Pinus mugo
	Pinus radiata
	Pinus sylvestris
	Pinus tabuliformis
	Pinus taeda
	Pinus yunnanensis
	Populus tremula
	Pseudotsuga menziesii
	Quercus petraea
	Secale cereale
	Sorghum bicolor
	Zea diploperennis
	Zea luxurians
	Zea mays ssp. mays
Sequence/RAPD
	Capsicum annuum (domesticated)
	Capsicum annuum (wild)
	Glycine soja
	Hordeum vulgare
	Medicago truncatula
	Picea abies
	Picea mariana
	Pinus radiata
	Pinus sylvestris
	Pseudotsuga menziesiii
	Quercus petraea
	Salix viminalis
Sequence/SSR
	Abies alba
	Arabidopsis halleri
	Arabidopsis lyrata *
	Arabidopsis thaliana
	Boechera stricta
	Brassica rapa
	Capsella rubella
	Capsicum annuum (domesticated)
	Capsicum annuum (wild)
	Cryptomeria japonica
	Glycine max
	Glycine soja
	Helianthus annuus (domesticated)
	Helianthus annuus (wild) *
	Helianthus petiolaris *
	Hordeum spontaneum
	Hordeum vulgare
	Juniperus przewalskii
	Juniperus tibetica
	Larix decidua
	Lens culinaris ssp. orientalis (wild)
	Lens culinaris ssp. culinaris (domesticated)
	Lolium perenne *
	Medicago truncatula
	Oryza eichingeri
	Oryza glaberrima
	Oryza officinalis
	Oryza punctata
	Oryza rhizomatis
	Oryza rufipogon
	Oryza sativa
	Pennisetum glaucum (domesticated)
	Pennisetum glaucum (wild)
	Phaseolus vulgaris
	Picea abies
	Picea glauca
	Pinus pinaster
	Pinus radiata
	Pinus tabuliformis
	Populus tremula
	Pseudotsuga menziesii *
	Quercus petraea
	Salix viminalis
	Sorghum bicolor
	Triticum turgidum ssp. dicoccoides
	Zea diploperennis
	Zea luxurians
	Zea mays ssp. mexicana
	Zea mays ssp. parviglumis
AFLP/Allozyme
	Ammopiptanthus nanus
	Arabidopsis thaliana
	Arabis alpina
	Araucaria angustifolia
	Astragalus bibullatus
	Brassica oleracea
	Brassica rapa
	Cakile maritima
	Carex bigelowii
	Euterpe edulis
	Fagopyrum esculentum
	Fagus sylvatica
	Glycine max
	Glycine soja
	Hordeum spontaneum
	Myricaria laxiflora
	Pancratium maritimum
	Phaseolus vulgaris
	Pinus contorta
	Pistacia lentiscus
	Populus nigra
	Primula elatior
	Quercus petraea
	Quercus robur
AFLP/ISSR
	Coffea arabica
	Commelina communis
	Dendrobium officinale
	Dysosma versipellis
	Fritillaria imperialis
	Ginkgo biloba
	Glycine soja
	Hagenia abyssinica
	Heritiera littoralis
	Jatropha curcas
	Limonium sinense
	Myricaria laxiflora
	Punica granatum
	Ranunculus cabrerensis
	Rumex acetosa
	Salvia miltiorrhiza
	Tribulus terrestris
AFLP/RAPD
	Anthoxanthum amarum
	Arabidopsis thaliana
	Brasenia schreberi
	Brassica oleracea
	Bupleurum rotundifolium
	Camellia nitidissima
	Camellia sinensis
	Caragana microphylla
	Coffea arabica
	Coffea canephora
	Dendrobium officinale
	Festuca pratensis
	Fritillaria imperialis
	Geum reptans
	Ginkgo biloba
	Glycine max
	Glycine soja
	Guizotia arborescens
	Guizotia scabra ssp. scabra
	Guizotia scabra ssp. schimperi
	Guizotia villosa
	Guizotia zavattarii
	Iris aphylla
	Jatropha curcas
	Olea europaea
	Panax ginseng
	Picea abies
	Pinus oocarpa
	Pistacia lentiscus
	Pongamia pinnata
	Quercus petraea
	Saponaria bellidifolia
	Solanum commersonii
	Tribulus terrestris
AFLP/SSR
	Abies ziyuanensis
	Ambrosia artemisiifolia
	Antirhea borbonica
	Arabidopsis thaliana
	Arabis alpina
	Araucaria angustifolia
	Avicennia marina
	Brassica oleracea
	Brassica rapa
	Carex extensa
	Coffea arabica
	Coffea canephora
	Cynara cardunculus var. sylvestris
	Daucus carota
	Dendrobium officinale
	Draba fladnizensis
	Draba nivalis
	Draba subcapitata
	Eryngium alpinum
	Fagopyrum esculentum
	Fagus sylvatica
	Glycine max
	Glycine soja *
	Hibiscus tiliaceus
	Hordeum spontaneum
	Juniperus communis
	Lactuca serriola
	Olea europaea
	Panax ginseng
	Persoonia mollis ssp. nectens
	Phaseolus coccineus
	Phaseolus vulgaris
	Picea abies
	Pinus contorta
	Pinus pinaster
	Pistacia lentiscus
	Populus euphratica
	Populus nigra
	Prunus armeniaca
	Pterocarpus officinalis
	Punica granatum
	Quercus petraea
	Quercus robur *
	Ricinus communis
	Solanum commersonii
	Swietenia macrophylla *
	Triticum turgidum ssp. dicoccoides
Allozyme/ISSR
	Aegiceras corniculatum
	Brassica rupestris
	Castanea mollissima
	Cymbidium goeringii
	Eucalyptus pellita
	Glycine soja
	Megaleranthis saniculifolia
	Myricaria laxiflora
	Vitex rotundifolia
Allozyme/RAPD
	Agalinis auriculata
	Agalinis purpurea
	Agalinis tenuifolia
	Antirrhinum microphyllum
	Arabidopsis thaliana
	Borderea chouardii
	Brassica oleracea
	Castanea dentata
	Colocasia esculenta
	Elymus fibrosus
	Eulophia sinensis
	Glandora oleifolia
	Glycine max
	Glycine soja
	Goodyera procera
	Hordeum vulgare
	Lens culinaris ssp. orientalis
	Lens ervoides
	Lens lamottei
	Lens nigricans
	Lens odemensis
	Medicago truncatula
	Oryza glumaepatula
	Panax ginseng
	Panax quinquefolius
	Picea abies
	Picea mariana
	Pinus attenuata
	Pinus longaeva
	Pinus muricata
	Pinus radiata
	Pinus sylvestris
	Pistacia lentiscus
	Pseudotsuga menziesii
	Quercus petraea
	Scabiosa columbaria
	Scutellaria indica
	Zeuxine gracilis
	Zeuxine strateumatica
Allozyme/SSR
	Abies alba
	Arabidopsis lyrata
	Arabidopsis thaliana
	Arabis alpina
	Araucaria angustifolia
	Borderea chouardii
	Borderea pyrenaica
	Brassica oleracea
	Brassica rapa
	Bromus tectorum
	Centaurea corymbosa
	Colocasia esculenta
	Cryptomeria japonica
	Cymbidium goeringii
	Elaeis guineensis
	Elymus caninus
	Elymus fibrosus
	Fagopyrum esculentum
	Fagus sylvatica
	Glycine max
	Glycine soja
	Guarea guidonia
	Helianthus annuus (domesticated)
	Helianthus annuus (wild)
	Helianthus petiolaris
	Hordeum spontaneum
	Hordeum vulgare
	Kandelia candel
	Larix decidua
	Lens culinaris ssp. culinaris (domesticated)
	Lens culinaris ssp. orientalis (wild)
	Lolium perenne
	Lychnis flos-cuculi
	Medicago truncatula
	Mimulus guttatus
	Myrica cerifera
	Oryza glumaepatula
	Oryza officinalis
	Oryza rufipogon
	Oryza sativa
	Panax ginseng
	Pennisetum glaucum (domesticated)
	Phaseolus lunatus
	Phaseolus vulgaris
	Phoenix dactylifera
	Picea abies
	Picea glauca
	Pinus contorta
	Pinus radiata
	Pinus strobus
	Pinus tabuliformis
	Pistacia lentiscus
	Populus alba
	Populus nigra
	Populus tremula
	Primula vulgaris
	Pseudotsuga menziesii
	Psychotria tenuinervis
	Quercus petraea
	Quercus robur
	Silene latifolia
	Sorghum bicolor
	Taxus baccata
	Triticum dicoccoides
	Vallisneria americana
	Zea diploperennis
	Zea luxurians
ISSR/RAPD
	Artemisia annua
	Camellia sinensis
	Coffea arabica
	Curcuma longa
	Dalbergia oliveri
	Dendrobium officinale
	Fritillaria imperialis
	Ginkgo biloba
	Glycine soja
	Heptacodium miconioides
	Hippophae rhamnoides ssp. sinensis
	Hippophae rhamnoides ssp. yunnanensis
	Jatropha curcas
	Juniperus brevifolia
	Juniperus phoenicea
	Lamiophlomis rotata
	Olea europaea ssp. cuspidata
	Pinus squamata
	Pongamia pinnata
	Sinocalycanthus chinensis
	Stipa krylovii
	Torreya jackii
	Tribulus terrestris
	Trigonella caerulea
	Trigonella foenum-graecum
	Vicia ramuliflora
	Vicia unijuga
ISSR/SSR
	Cymbidium goeringii
	Dendrobium officinale
	Michelia coriacea
	Rheum tanguticum
	Sagittaria natans
	Schisandra chinensis
	Schisandra sphenanthera
RAPD/SSR
	Arabidopsis thaliana
	Borderea chouardii
	Campanula thyrsoides
	Capsicum annuum (domesticated)
	Capsicum annuum (wild)
	Citrullus lanatus
	Coffea arabica
	Coffea canephora
	Colocasia esculenta
	Dendrobium officinale
	Elymus fibrosus
	Glycine max
	Glycine soja
	Hordeum vulgare
	Medicago sativa
	Medicago truncatula
	Neolitsea sericea
	Olea europaea
	Oryza glumaepatula
	Panax ginseng
	Picea abies
	Pinus radiata
	Pistacia lentiscus
	Pseudotsuga menziesiii
	Quercus petraea
	Salix viminalis
	Solanum commersonii
	Trifolium pratense
	Vitellaria paradoxa
Note: Those taxa indicated by the asterisk were excluded in the regression analysis for the five chosen marker pairs (Sequence/Allozyme, Sequence/RAPD, Sequence/SSR, AFLP/SSR and RAPD/ISSR).

## Sheet: Table S5
Table S5 Summary of the numbers of taxa, linear coefficient, significance and R square values for regression analysis.
Marker pair	N	b	P	R2
Sequence/Allozyme	39	0.021	< 0.001	0.714
Sequence/RAPD	12	0.013	< 0.001	0.831
Sequence/SSR	44	0.002	< 0.001	0.681
SSR/AFLP	44	6.151	< 0.001	0.661
RAPD/ISSR	27	1.087	< 0.001	0.903

## Sheet: Table S6
Table S6 Summary of the unified π values, taxonomy, life history trait and extinction risk information for each taxon.
Taxon	πs	Marker_πs	πt	Marker_πt	Family	Order	Taxonomy	Geographic range	Breeding system	Extinction risk
Abeliophyllum distichum Nakai	0.00313793	Allozyme	0.00454745	Allozyme	Oleaceae	Lamiales	dicots	narrow	outcrossing (animal)
Abies alba Mill.	0.0038309	SSR	0.0061	Sequence	Pinaceae	Pinales	gymnosperm	wide	outcrossing (wind)	LC
Abies sachalinensis F. Schmidt			0.0120845	SSR	Pinaceae	Pinales	gymnosperm	wide	outcrossing (wind)	LC
Abies ziyuanensis L. K. Fu & S. L. Mo	0.00101659	SSR	0.00153982	SSR	Pinaceae	Pinales	gymnosperm	narrow	outcrossing (wind)	EN
Abronia alpina Brandeg.	0.00492525	AFLP	0.00648998	AFLP	Nyctaginaceae	Caryophyllales	dicots	narrow	outcrossing (animal)
Abronia umbellata Lam. ssp. breviflora (Standl.) Munz	0.00185504	ISSR			Nyctaginaceae	Caryophyllales	dicots	narrow
Acacia attenuata Maiden & Blakely	0.00659527	Allozyme			Fabaceae	Fabales	dicots	narrow	outcrossing (animal)
Acacia caven (Molina) Molina	0.00531579	Allozyme			Fabaceae	Fabales	dicots	wide	outcrossing (animal)
Acacia melanoxylon R. Br.	0.00551515	Allozyme			Fabaceae	Fabales	dicots	narrow	outcrossing (animal)
Acacia microbotrya Benth. var. borealis E. Pritzel	0.0045164	Allozyme			Fabaceae	Fabales	dicots	narrow	outcrossing (animal)
Acacia microbotrya Benth. var. microbotrya	0.00417986	Allozyme			Fabaceae	Fabales	dicots	narrow	outcrossing (animal)
Acacia pennata (L.) Willd.	0.00279616	SSR			Fabaceae	Fabales	dicots	wide	outcrossing (wind)
Acacia senegal Britton	0.00174532	SSR	0.00225532	SSR	Fabaceae	Fabales	dicots	wide	outcrossing (animal)
Achillea biebersteinii Afan.			0.00270588	AFLP	Asteraceae	Asterales	dicots
Achillea filipendulina Lam.			0.00274201	AFLP	Asteraceae	Asterales	dicots	wide
Achillea millefolium L.			0.00354404	AFLP	Asteraceae	Asterales	dicots	wide
Achillea santolina L.			0.00104348	AFLP	Asteraceae	Asterales	dicots
Achillea tenuifolia Lam.			0.00391512	AFLP	Asteraceae	Asterales	dicots
Aciphylla glaucescens W. R. B. Oliver	0.00558228	Allozyme			Apiaceae	Apiales	dicots	narrow	outcrossing (wind)
Acorus calamus L.	0.00127384	ISSR	0.00326903	ISSR	Acoraceae	Acorales	monocots	wide		LC
Adansonia digitata L.	0.0051184	AFLP	0.00657585	AFLP	Malvaceae	Malvales	dicots	wide	outcrossing
Adenophora grandiflora Nakai	0.00734008	Allozyme	0.00761035	Allozyme	Campanulaceae	Asterales	dicots	narrow	outcrossing & asexual
Adenophora lilifolia (L.) DC.	0.00413941	ISSR	0.00518071	ISSR	Campanulaceae	Asterales	dicots	narrow
Adenophora lobophylla Hong	0.00558228	Allozyme	0.00561597	Allozyme	Campanulaceae	Asterales	dicots	narrow	outcrossing
Adenophora potaninii Korsh.	0.00641514	Allozyme	0.00677778	Allozyme	Campanulaceae	Asterales	dicots	wide	outcrossing
Adonis aestivalis L.	0.00260624	RAPD			Ranunculaceae	Ranunculales	dicots	wide	mixed
Aegiceras corniculatum (L.) Blanco	0.00045046	Allozyme	0.000505376	Allozyme	Primulaceae	Ericales	dicots	wide	mixed	LC
Aegilops cylindrica Host	0.000631579	SSR			Poaceae	Poales	monocots	wide
Aegiphila sellowiana Cham.	0.00149275	RAPD	0.00302959	RAPD	Verbenaceae	Lamiales	dicots	wide	outcrossing & asexual
Aeluropus lagopoides (Linn.) Trin. ex Thw.	0.00440295	RAPD	0.00649025	RAPD	Poaceae	Poales	monocots	wide	outcrossing (wind) & asexual
Afgekia sericea Craib	0.00243943	RAPD	0.00463908	RAPD	Fabaceae	Fabales	dicots	narrow
Agalinis auriculata (Michx.) S. F. Blake	0.000472393	Allozyme			Orobanchaceae	Lamiales	dicots	narrow	outcrossing
Agalinis purpurea L.			0.00521723	Allozyme	Orobanchaceae	Lamiales	dicots	wide
Agalinis tenuifolia (Vahl) Raf.	0.004	Allozyme			Orobanchaceae	Lamiales	dicots	wide
Agathis robusta (C. Moore ex F. Muell.) F. M. Bailey			0.00281481	AFLP	Araucariaceae	Pinales	gymnosperm	narrow	outcrossing (wind)	LC
Agave cerulata Trel.			0.00403801	RAPD	Asparagaceae	Asparagales	monocots	narrow	outcrossing
Agave cocui Trel.	0.00119873	Allozyme	0.00131668	Allozyme	Asparagaceae	Asparagales	monocots	narrow	mixed
Agave cupreata Trel. & A. Berger	0.0183996	Allozyme			Asparagaceae	Asparagales	monocots	narrow	outcrossing
Agave deserti Engelm.			0.00297052	RAPD	Asparagaceae	Asparagales	monocots	narrow	outcrossing
Agave lechuguilla Torr.	0.0136535	Allozyme			Asparagaceae	Asparagales	monocots	narrow	outcrossing	LC
Agave subsimplex Trel.			0.00218692	RAPD	Asparagaceae	Asparagales	monocots	narrow	outcrossing
Agave victoriae-reginae T. Moore	0.0103433	Allozyme			Asparagaceae	Asparagales	monocots	narrow	outcrossing
Ageratina adenophora (Spreng.) King & H. Rob.	0.00254846	ISSR	0.00430065	ISSR	Asteraceae	Asterales	dicots	wide	asexual
Ainsliaea faurieana Beauverd	0.0014188	SSR			Asteraceae	Asterales	dicots	narrow	outcrossing (animal)
Alcantarea geniculata (Wawra) J. R. Grant	0.00123102	SSR	0.00150263	SSR	Bromeliaceae	Poales	monocots	narrow	mixed
Alcantarea glaziouana (Lemaire) Leme	0.001003	SSR	0.00178788	SSR	Bromeliaceae	Poales	monocots	narrow
Alcantarea imperialis (Carrière) Harms	0.00132779	SSR	0.00319481	SSR	Bromeliaceae	Poales	monocots	narrow	mixed
Alcantarea regina (Vellozo) Harms	0.00169686	SSR	0.00219287	SSR	Bromeliaceae	Poales	monocots	narrow
Alhagi sparsifolia Shap.	0.00443836	AFLP			Fabaceae	Fabales	dicots	wide	asexual
Allocasuarina emuina L. A. S. Johnson	0.00284262	SSR			Casuarinaceae	Fagales	dicots	narrow	outcrossing (wind)
Alopecurus myosuroides Huds.	0.00378947	AFLP	0.00391512	AFLP	Poaceae	Poales	monocots	wide	outcrossing
Alphitonia ponderosa Hillebr.	0.00120765	RAPD	0.00173923	RAPD	Rhamnaceae	Rosales	dicots	narrow		VU
Alyssum montanum L.	0.00197696	RAPD			Brassicaceae	Brassicales	dicots	wide
Ambrosia artemisiifolia L.	0.00626446	SSR			Asteraceae	Asterales	dicots	wide	outcrossing (wind)
Amentotaxus argotaenia (Hance) Pilg.	0.000551502	ISSR	0.00315476	ISSR	Cephalotaxaceae	Pinales	gymnosperm	wide	outcrossing (wind)	NT
Amentotaxus formosana H. L. Li			0.000633636	ISSR	Cephalotaxaceae	Pinales	gymnosperm	narrow	outcrossing (wind)	VU
Amentotaxus yunnanensis H. L. Li	0.000625992	ISSR	0.00230371	ISSR	Cephalotaxaceae	Pinales	gymnosperm	narrow	outcrossing (wind)	VU
Ammophila arenaria (L.) Link	0.00427915	ISSR			Poaceae	Poales	monocots	wide
Ammopiptanthus nanus (Popov) S. H. Cheng	0.000784232	Allozyme	0.000875	Allozyme	Fabaceae	Fabales	dicots	narrow	selfing	CR
Amorpha georgiana Wilbur			0.00596813	SSR	Fabaceae	Fabales	dicots	narrow	mixed
Amphicarpaea edgeworthii Benth.	0.00218692	RAPD	0.00488171	RAPD	Fabaceae	Fabales	dicots	wide	selfing
Anacardium occidentale L.	0.00410738	AFLP	0.00426016	AFLP	Anacardiaceae	Sapindales	dicots	wide
Anagallis arvensis L.	0.00245779	RAPD			Myrsinaceae	Ericales	dicots	wide	selfing
Anagallis foemina Mill.	0.000756614	RAPD			Myrsinaceae	Ericales	dicots	wide	selfing
Anagyris latifolia Brouss. ex Willd.	0.00184018	RAPD	0.00325	RAPD	Fabaceae	Fabales	dicots	narrow	mixed	EN
Ancistrocladus korupensi D. W. Thomas & Gereau	0.000920668	Allozyme	0.00089781	Allozyme	Ancistrocladaceae	Caryophyllales	dicots	narrow
Androsace obtusifolia All.	0.00104348	AFLP	0.00228571	AFLP	Primulaceae	Ericales	dicots		outcrossing (animal)
Androsace tapete Maxim.	0.00680856	ISSR			Primulaceae	Ericales	dicots	wide
Anemone nemorosa L.	0.0328462	Allozyme	0.129	Allozyme	Ranunculaceae	Ranunculales	dicots	wide
Anemopaegma arvense (Vell.) Stelff. ex Souza	0.00515642	RAPD			Bignoniaceae	Lamiales	dicots	narrow
Angelica palustris (Bess.) Hoffm	0.00271947	RAPD			Apiaceae	Apiales	dicots	narrow
Anisodus tanguticus Pascher	0.00314506	RAPD	0.00561131	RAPD	Solanaceae	Solanales	dicots	narrow
Annona crassiflora Mart.	0.00456757	RAPD	0.00584058	RAPD	Annonaceae	Magnoliales	dicots	narrow
Anthoxanthum alpinum A. & D. Löve			0.0110769	AFLP	Poaceae	Poales	monocots	narrow
Anthoxanthum amarum Brot.	0.00796774	RAPD	0.0110741	RAPD	Poaceae	Poales	monocots	narrow
Anthoxanthum aristatum Boiss.			0.0232941	AFLP	Poaceae	Poales	monocots	wide
Anthoxanthum gracile Biv.			0.000765957	AFLP	Poaceae	Poales	monocots	narrow
Anthoxanthum maderense Teppner			0.00263415	AFLP	Poaceae	Poales	monocots	narrow
Anthoxanthum odoratum L.			0.00735484	AFLP	Poaceae	Poales	monocots	wide
Anthoxanthum ovatum Lag.			0.0152727	AFLP	Poaceae	Poales	monocots	narrow
Anthyllis rupestris Coss.	0.0037665	ISSR	0.00614099	ISSR	Fabaceae	Fabales	dicots	narrow	outcrossing
Antirhea aromatica Castillo-Campos & Lorence	0.00476371	Allozyme			Rubiaceae	Gentianales	dicots	narrow	outcrossing
Antirhea borbonica J. F. Gmel	0.00147222	SSR			Rubiaceae	Gentianales	dicots	narrow	outcrossing (animal)
Antirrhinum microphyllum Rothm.	0.00538191	Allozyme	0.00585422	Allozyme	Plantaginaceae	Lamiales	dicots	narrow	outcrossing (animal)
Aquilegia paui Font Quer	0.000126761	Allozyme			Ranunculaceae	Ranunculales	dicots	narrow	selfing
Aquilegia vulgaris L.	0.000604938	Allozyme			Ranunculaceae	Ranunculales	dicots	wide
Arabidopsis arenosa (L.) Lawalrée ssp. arenosa			0.00223488	AFLP	Brassicaceae	Brassicales	dicots	wide	outcrossing
Arabidopsis arenosa (L.) Lawalrée ssp. Borbasii (Zapałowicz) O’Kane & Al-Shehbaz			0.00220118	AFLP	Brassicaceae	Brassicales	dicots	wide	outcrossing
Arabidopsis carpatica, nom. prov.			0.00192111	AFLP	Brassicaceae	Brassicales	dicots	narrow	outcrossing
Arabidopsis halleri (L.) O'Kane & Al-Shehbaz			0.015	Sequence	Brassicaceae	Brassicales	dicots	wide	outcrossing (animal)
Arabidopsis lyrata (L.) O'Kane & Al-Shehbaz	0.00108166	SSR	0.0225	Sequence	Brassicaceae	Brassicales	dicots	wide	outcrossing
Arabidopsis neglecta (L.) O'Kane & Al-Shehbaz			0.00171429	AFLP	Brassicaceae	Brassicales	dicots	narrow	outcrossing
Arabidopsis petrogena (A. Kern) V. I. Dorof.			0.00192111	AFLP	Brassicaceae	Brassicales	dicots	narrow	outcrossing
Arabidopsis thaliana (L.) Heynh.	0.00126699	Allozyme	0.0083	Sequence	Brassicaceae	Brassicales	dicots	wide	selfing
Arabis alpina L.	0.000631579	AFLP	0.00234783	SSR	Brassicaceae	Brassicales	dicots	wide	outcrossing (animal)
Arabis serrata Fr. & Sav.	0.0034186	Allozyme			Brassicaceae	Brassicales	dicots	wide	outcrossing
Arachis pintoi Krapov. & W. C. Gregory			0.00530986	RAPD	Fabaceae	Fabales	dicots	wide
Araucaria angustifolia (Bertol.) Kuntze	0.00436943	SSR	0.00516846	SSR	Araucariaceae	Pinales	gymnosperm	narrow	outcrossing (wind)	CR
Araucaria cunninghamii Aiton ex D. Don			0.00195349	AFLP	Araucariaceae	Pinales	gymnosperm	wide	outcrossing (wind)	LC
Arbutus menziesii Pursh	0.00124503	AFLP			Ericaceae	Ericales	dicots	narrow	outcrossing (animal)
Arceuthobium americanum Nutt. ex Engelm.	0.00245783	AFLP	0.00374803	AFLP	Santalaceae	Santalales	dicots	wide	outcrossing
Ardisia crenata Sims	0.000906977	SSR	0.00700901	SSR	Myrsinaceae	Ericales	dicots	wide	selfing
Argyroderma pearsonii (N. E. Br.) Schw.	0.00266993	AFLP			Aizoaceae	Caryophyllales	dicots	narrow	outcrossing
Argyroxiphium kauense (Rock & M. Neal) O. Deg. & I. Deg.	0.000911208	SSR			Asteraceae	Asterales	dicots	narrow	outcrossing	CR
Argyroxiphium sandwicense DC.	0.000512563	SSR			Asteraceae	Asterales	dicots	narrow	outcrossing	VU
Aristida stricta Michx.	0.000736842	ISSR			Poaceae	Poales	monocots	wide	outcrossing (wind)
Aristolochia contorta Bunge	0.00235929	Allozyme	0.00283655	Allozyme	Aristolochiaceae	Piperales	dicots	narrow	sexual & asexual
Aristolochia manshuriensis Kom.	0.00233333	Allozyme	0.00259551	Allozyme	Aristolochiaceae	Piperales	dicots	narrow	outcrossing
Armeria maderensis Lowe			0.00195349	AFLP	Plumbaginaceae	Caryophyllales	dicots	narrow	outcrossing
Armeria pungens (Link) Hoffmanns. & Link	0.00148315	AFLP			Plumbaginaceae	Caryophyllales	dicots	narrow	outcrossing
Artemisia annua L.	0.00740816	RAPD	0.00892243	RAPD	Asteraceae	Asterales	dicots	wide
Asclepias exaltata L.	0.00322145	Allozyme			Apocynaceae	Gentianales	dicots	wide	outcrossing (animal)
Asclepias meadii Torr. ex A. Gray	0.00373498	Allozyme			Apocynaceae	Gentianales	dicots	narrow	outcrossing (animal)
Asimina triloba (L.) Dunal (wild)			0.00100108	AFLP	Annonaceae	Magnoliales	dicots	wide	asexual
Asparagus acutifolius L.	0.00232463	ISSR	0.00496505	ISSR	Asparagaceae	Asparagales	monocots	wide	outcrossing (animal)
Aspidosperma polyneuron Müll. Arg.	0.00618182	AFLP	0.00757586	AFLP	Apocynaceae	Gentianales	dicots	narrow		EN
Aster spathulifolius Maxim.	0.0023853	Allozyme	0.00525	Allozyme	Asteraceae	Asterales	dicots	narrow	outcrossing
Astragalus bibullatus Barneby & E. L. Bridges	0.004	Allozyme			Fabaceae	Fabales	dicots	narrow	selfing
Astragalus nitidiflorus Jiménez & Pau	0.00208826	ISSR	0.00289189	ISSR	Fabaceae	Fabales	dicots	narrow	selfing	EX
Atractylis preauxiana Sch. Bip.	0.00251313	RAPD	0.00433333	RAPD	Asteraceae	Asterales	dicots	narrow		EN
Atractylodes macrocepha Koidz.	0.00489339	ISSR	0.00640222	ISSR	Asteraceae	Asterales	dicots	narrow	outcrossing
Atriplex tatarica L.	0.00385207	Allozyme	0.0051194	Allozyme	Amaranthaceae	Caryophyllales	dicots	wide	mixed
Aucoumea klaineana Pierre	0.00203226	SSR			Burseraceae	Sapindales	dicots	narrow	outcrossing (animal)	VU
Austrocedrus chilensis Florin & Boutelje	0.00669565	SSR			Cupressaceae	Pinales	gymnosperm	wide	outcrossing (wind)	NT
Austromyrtus acmenoides F. Muell. Burret			0.00730189	Allozyme	Myrtaceae	Myrtales	dicots	narrow	outcrossing
Austromyrtus bidwillii Benth. & Burret	0.00571756	Allozyme			Myrtaceae	Myrtales	dicots	narrow	outcrossing
Austromyrtus gonoclada (F. Muell. Ex Benth.) Burret	0.00761035	Allozyme			Myrtaceae	Myrtales	dicots	narrow	outcrossing
Austromyrtus hillii (Benth.) Burret	0.00286364	Allozyme			Myrtaceae	Myrtales	dicots	narrow	outcrossing
Austromyrtus inophloia (J. F. Bailey & C. T. White) Burret	0.0035614	Allozyme			Myrtaceae	Myrtales	dicots	narrow	outcrossing
Avena agadiriana B. R. Baum & G. Fedak	0.00378169	Allozyme			Poaceae	Poales	monocots	narrow
Avena maroccana Gand.			0.00685885	Allozyme	Poaceae	Poales	monocots	narrow
Avicennia germinans (L.) L.	0.00180898	AFLP	0.00322843	AFLP	Acanthaceae	Lamiales	dicots	wide	outcrossing	LC
Avicennia marina (Forssk.) Vierh.	0.0010303	SSR	0.0011291	AFLP	Acanthaceae	Lamiales	dicots	wide	outcrossing	LC
Azadirachta indica A. Juss.			0.0124902	RAPD	Meliaceae	Sapindales	dicots	wide	outcrossing
Bactris gasipaes Kunth	0.00399787	AFLP			Arecaceae	Arecales	monocots	wide	outcrossing (animal)
Baillonella toxisperma Pierre	0.00265116	SSR			Sapotaceae	Ericales	dicots	narrow	selfing	VU
Banksia attenuata R. Br.	0.00554717	SSR			Proteaceae	Proteales	dicots	narrow	outcrossing
Banksia candolleana Meisn.	0.00514286	SSR			Proteaceae	Proteales	dicots	narrow	asexual
Banksia hookeriana Meisn.	0.00247527	AFLP	0.00309434	AFLP	Proteaceae	Proteales	dicots	narrow	outcrossing
Banksia saxicola A. S. George	0.00338462	AFLP	0.0053913	AFLP	Proteaceae	Proteales	dicots	narrow
Baptisia arachnifera W. H. Duncan	0.00158065	Allozyme	0.00225581	Allozyme	Proteaceae	Proteales	dicots	narrow	outcrossing
Batrachium bungei (Steud.) L. Liou	0.000376669	ISSR	0.00276446	ISSR	Ranunculaceae	Ranunculales	dicots	wide	sexual & asexual
Berchemiella wilsonii (Schneid.) Nakai var. pubipetiolata H. Qian	0.0020404	SSR	0.00202414	SSR	Rhamnaceae	Rosales	dicots	narrow	outcrossing
Betula humilis Schrk.	0.00196825	SSR			Betulaceae	Fagales	dicots	narrow	outcrossing (wind)
Betula maximowicziana Regel	0.0011746	SSR	0.00109119	SSR	Betulaceae	Fagales	dicots	narrow	outcrossing (wind)
Betula nana L.	0.00283655	Allozyme	0.00344703	Allozyme	Betulaceae	Fagales	dicots	wide	outcrossing (wind) & asexual
Bidens alba (L.) DC.	0.000126761	Allozyme	0.000105528	Allozyme	Asteraceae	Asterales	dicots	wide
Bidens pilosa L.	0.00160495	Allozyme	6.31896e-05	Allozyme	Asteraceae	Asterales	dicots	wide
Bidens subalternans DC.	0.000126761	Allozyme	2.1021e-05	Allozyme	Asteraceae	Asterales	dicots	wide
Biscutella neustriaca Bonnet	0.00280769	SSR			Brassicaceae	Brassicales	dicots	narrow	outcrossing & asexual	VU
Bixa orellana L.	0.0014359	Allozyme			Bixaceae	Malvales	dicots	wide	outcrossing (animal)
Boechera fecunda (Rollins) Dorn	0.0005	SSR	0.0017037	SSR	Brassicaceae	Brassicales	dicots	narrow	selfing
Boechera stricta (A. Gray) A. Löve & D. Löve	0.000702703	SSR	0.003	Sequence	Brassicaceae	Brassicales	dicots	wide	selfing
Boleum asperum (Pers.) Desv.	0.0302535	AFLP	0.034875	AFLP	Brassicaceae	Brassicales	dicots	narrow	outcrossing (animal)	LC
Boltonia decurrens (Torr. & A. Gray) Alph. Wood	0.00961224	Allozyme			Asteraceae	Asterales	dicots	narrow	outcrossing
Borago officinalis L. (wild)	0.00229412	RAPD			Boraginaceae	Lamiales	dicots	wide	mixed
Borderea chouardii (Gaussen) Heslot			0.000409639	SSR	Dioscoreaceae	Dioscoreales	monocots	narrow	outcrossing	CR
Borderea pyrenaica (Bub.) Mieg.	0.000478315	SSR	0.00166839	Allozyme	Dioscoreaceae	Dioscoreales	monocots	narrow	outcrossing
Boswellia sacra Flueck.	0.0022037	ISSR	0.00399486	ISSR	Burseraceae	Sapindales	dicots	wide	outcrossing	NT
Bouteloua gracilis (Willd. ex Kunth) Lag. ex Griffiths	0.00466544	RAPD			Poaceae	Poales	monocots	wide	outcrossing
Brasenia schreberi Schreb.	0.00081509	RAPD			Cabombaceae	Nymphaeales	dicots	wide	outcrossing (wind)
Brighamia insignis A. Gray	0.00124576	Allozyme	0.00141195	Allozyme	Campanulaceae	Asterales	dicots	narrow		CR
Brighamia rockii H. St. John	0.00126935	Allozyme	0.00141195	Allozyme	Campanulaceae	Asterales	dicots	narrow		CR
Briza media L.	0.00426016	AFLP			Poaceae	Poales	monocots	wide	mixed
Bromelia antiacantha Bertoloni	0.00253515	SSR	0.00268384	SSR	Bromeliaceae	Poales	monocots	narrow	outcrossing
Bromus ircutensis Kom.	0.00446966	ISSR	0.00577401	ISSR	Poaceae	Poales	monocots	wide	asexual
Bromus tectorum L.	0.00086944	SSR			Poaceae	Poales	monocots	wide	selfing
Bruguiera gymnorrhiza (L.) Lam.	0.0142349	Allozyme	0.0120709	Allozyme	Rhizophoraceae	Malpighiales	dicots	wide	mixed
Bryonia alba L.			0.00129299	Allozyme	Cucurbitaceae	Cucurbitales	dicots	wide
Bulbophyllum drymoglossum Maxim.	0.000233569	Allozyme	0.000341463	Allozyme	Orchidaceae	Asparagales	monocots	narrow	mixed
Bupleurum rotundifolium L.	0.000993541	RAPD			Apiaceae	Apiales	dicots	wide	mixed
Cakile edentula (Biget.) Hook	0.00089781	Allozyme	0.00280952	Allozyme	Brassicaceae	Brassicales	dicots	wide	mixed
Cakile maritima Scop.	0.0103433	Allozyme			Brassicaceae	Brassicales	dicots	wide	outcrossing
Caladenia tentachulata Schltdl.			0.014	Allozyme	Orchidaceae	Asparagales	monocots
Calamus thwaitesii Becc.	0.00229802	ISSR			Arecaceae	Arecales	monocots	narrow
Caldesia grandis Samuelsson	0.00172754	RAPD	0.00206024	RAPD	Alismataceae	Alismatales	monocots	narrow	asexual	LC
Callitriche cophocarpa Sendtn.	0.000922956	Allozyme	0.00190076	Allozyme	Plantaginaceae	Lamiales	dicots	narrow	asexual	LC
Calluna vulgaris (L.) Hull	0.00322145	Allozyme			Ericaceae	Ericales	dicots	wide
Calocedrus macrolepis Kurz	0.00175512	ISSR	0.0018371	ISSR	Cupressaceae	Pinales	gymnosperm	wide	outcrossing (wind)	NT
Calothamnus quadrifidus R. Br.			0.0130376	SSR	Myrtaceae	Myrtales	dicots	narrow	outcrossing
Calycanthus chinensis Cheng et S. Y. Chang	0.0025521	RAPD	0.00344945	RAPD	Calycanthaceae	Laurales	dicots	narrow
Calystegia collina (Greene) Brummitt	0.00312821	SSR			Convolvulaceae	Solanales	dicots	narrow
Calystegia soldanella (L.) R. Br. ex Roem. & Schult.			0.00157782	SSR	Convolvulaceae	Solanales	dicots	wide	outcrossing (wind)
Camellia euphlebia Merr. ex Sealy	0.00173034	ISSR	0.0025426	ISSR	Theaceae	Ericales	dicots	narrow	outcrossing	VU
Camellia japonica L.			0.0105	SSR	Theaceae	Ericales	dicots	wide	outcrossing
Camellia nitidissima Chi	0.00155604	RAPD	0.00480334	RAPD	Theaceae	Ericales	dicots	narrow	outcrossing
Camellia reticulata Lindl.	0.00227907	ISSR	0.00546878	ISSR	Theaceae	Ericales	dicots	narrow	outcrossing	VU
Camellia sinensis (L.) Kuntze	0.00625926	RAPD	0.00859468	RAPD	Theaceae	Ericales	dicots	wide	outcrossing
Campanula barbata L.	0.00118681	AFLP	0.00245783	AFLP	Campanulaceae	Asterales	dicots		outcrossing (animal)
Campanula pollinensis Podlech	0.00442105	ISSR			Campanulaceae	Asterales	dicots	narrow	outcrossing
Campanula sabatia De Not.	0.00272935	AFLP	0.0038207	AFLP	Campanulaceae	Asterales	dicots	narrow	outcrossing	VU
Campanula thyrsoides L.	0.00603213	SSR			Campanulaceae	Asterales	dicots	wide	outcrossing (animal)
Campnosperma brevipetiolata Volk.	0.00256902	Allozyme	0.002918	Allozyme	Anacardiaceae	Sapindales	dicots	narrow	outcrossing
Capsella grandiflora (Fauche & Chaub.) Boiss.			0.023	Sequence	Brassicaceae	Brassicales	dicots	narrow	outcrossing
Capsella rubella Reut.	0.00043309	SSR	0.0067	Sequence	Brassicaceae	Brassicales	dicots	wide	selfing
Capsicum annuum L. (wild)	0.00174532	SSR	0.00255	Sequence	Solanaceae	Solanales	dicots	wide	selfing
Caragana korshinskyi Kom.	0.0077317	Allozyme	0.00906012	Allozyme	Fabaceae	Fabales	dicots	wide	outcrossing (animal)
Caragana microphylla Lam.	0.00290993	RAPD	0.00318727	RAPD	Fabaceae	Fabales	dicots	narrow	outcrossing (animal)
Carapa guianensis Aublet.	0.00305051	SSR			Meliaceae	Sapindales	dicots	wide	outcrossing (animal)
Cardamine nipponica Franch. et Savat.			0.00178	Sequence	Brassicaceae	Brassicales	dicots	narrow	selfing
Carduus acanthoides L.	0.0120189	Allozyme	0.0138837	Allozyme	Asteraceae	Asterales	dicots	wide	selfing
Carex atrofusca Schkuhr	0.000150668	AFLP			Cyperaceae	Poales	monocots	wide	outcrossing (wind)
Carex bigelowii Torr. ex Schwein.	0.003	Allozyme	0.00353271	Allozyme	Cyperaceae	Poales	monocots	wide	outcrossing (wind)
Carex davalliana Sm.	0.0034186	Allozyme			Cyperaceae	Poales	monocots	narrow	outcrossing (wind)
Carex ensifolia Turcz. ex Besser	0.0101573	Allozyme	0.0151446	Allozyme	Cyperaceae	Poales	monocots	wide	mixed
Carex extensa Gooden.	0.000222222	SSR	0.00233839	SSR	Cyperaceae	Poales	monocots	wide	outcrossing (wind)
Carex firma Host	0.00318987	AFLP	0.0053913	AFLP	Cyperaceae	Poales	monocots		outcrossing (wind)
Carex helodes Link	0.00103923	AFLP			Cyperaceae	Poales	monocots	narrow	outcrossing (wind)
Carex kobomugi Ohwi	0.00286618	SSR			Cyperaceae	Poales	monocots	wide	outcrossing (wind) & asexual
Carex lasiocarpa Ehrh.	0.00525	Allozyme	0.00776712	Allozyme	Cyperaceae	Poales	monocots	wide	outcrossing (wind)
Carex latebracteata Waterf.	0.00192111	AFLP			Cyperaceae	Poales	monocots	narrow	mixed
Carex lugens T. Holm	0.0106742	Allozyme	0.0117613	Allozyme	Cyperaceae	Poales	monocots	wide	outcrossing (wind)
Carex macrocephala Willd. ex Spreng.			0.00169686	SSR	Cyperaceae	Poales	monocots	wide
Carex mitchelliana M. A. Curtis	0.000809118	Allozyme			Cyperaceae	Poales	monocots	narrow
Carex pellita Muhl. ex Willd.	0.00816667	Allozyme	0.007	Allozyme	Cyperaceae	Poales	monocots	wide	outcrossing (wind)
Carex sempervirens Vill.	0.000903226	AFLP	0.00163636	AFLP	Cyperaceae	Poales	monocots		outcrossing (wind)
Carex stans Drejer	0.0049901	Allozyme	0.0082887	Allozyme	Cyperaceae	Poales	monocots	wide	mixed
Carpobrotus chilensis (Molina) N. E. Br	0.000920668	Allozyme	0.00105882	Allozyme	Aizoaceae	Caryophyllales	dicots	wide	outcrossing
Carpobrotus edulis (L.) N. E. Br	0.00421008	Allozyme	0.00525	Allozyme	Aizoaceae	Caryophyllales	dicots	wide	outcrossing
Carthamus tinctorius L.			0.00157143	SSR	Asteraceae	Asterales	dicots	wide
Caryocar brasiliense Cambess.	0.0118889	SSR			Caryocaraceae	Malpighiales	dicots	wide	outcrossing
Castanea dentata (Marsh.) Borkh.	0.00421008	Allozyme	0.00571756	Allozyme	Fagaceae	Fagales	dicots	wide	outcrossing (wind)
Castanea henryi (Skan) Rehd. et Wils.	0.00741678	Allozyme	0.00824791	Allozyme	Fagaceae	Fagales	dicots	narrow
Castanea mollissima Blume	0.00947896	Allozyme	0.00992784	Allozyme	Fagaceae	Fagales	dicots	wide
Castanea pumila (L.) Mill. var. ozarkensis (Ashe) Tucker	0.00620207	Allozyme	0.00630819	Allozyme	Fagaceae	Fagales	dicots	narrow
Castanea pumila (L.) Mill. var. pumila	0.00882955	Allozyme	0.00882955	Allozyme	Fagaceae	Fagales	dicots	wide
Castanea sativa Mill.	0.00866102	Allozyme			Fagaceae	Fagales	dicots	wide
Castanea seguinii Dode.	0.00479853	Allozyme	0.00483026	Allozyme	Fagaceae	Fagales	dicots	wide
Castanopsis carlesii (Hemsl.) Hayata	0.00776712	Allozyme			Fagaceae	Fagales	dicots	wide	outcrossing (wind)
Castanopsis chinensis (Spreng.) Hance			0.00457895	SSR	Fagaceae	Fagales	dicots	wide
Castanopsis eyrei (Champ. ex Benth.) Tutcher	0.00709091	SSR	0.00911111	SSR	Fagaceae	Fagales	dicots	wide	outcrossing (wind)
Castanopsis fargesii Franch.	0.00513869	RAPD	0.00546591	RAPD	Fagaceae	Fagales	dicots	wide	outcrossing
Castanopsis sclerophylla (Lindl. & Paxton) Schottky	0.0018835	SSR			Fagaceae	Fagales	dicots	wide	outcrossing (wind)
Castilleja grisea Dunkle	0.00230744	Allozyme	0.00333372	Allozyme	Orobanchaceae	Lamiales	dicots	narrow	outcrossing
Castilleja levisecta Greenm.	0.00568361	Allozyme	0.00837063	Allozyme	Orobanchaceae	Lamiales	dicots	narrow	outcrossing (animal)
Casuarina cunninghamiana Miq.	0.0014219	ISSR			Casuarinaceae	Fagales	dicots
Casuarina equisetifolia L.	0.00206979	ISSR			Casuarinaceae	Fagales	dicots
Casuarina glauca Sieber	0.000857264	ISSR			Casuarinaceae	Fagales	dicots
Catananche lutea L.	0.00190498	AFLP			Asteraceae	Asterales	dicots	wide	mixed
Catasetum viridiflavum Hook.	0.00943478	Allozyme			Orchidaceae	Asparagales	monocots	narrow
Cathaya argyrophylla Chun & Kuang	0.0023853	Allozyme			Pinaceae	Pinales	gymnosperm	narrow	outcrossing (wind)	VU
Cedrela odorata L.	0.00245783	AFLP	0.00338462	AFLP	Meliaceae	Sapindales	dicots	wide		VU
Cedrus atlantica (Endl.) Manetti ex Carrière	0.00182488	AFLP			Pinaceae	Pinales	gymnosperm	narrow	outcrossing (wind)	EN
Centaurea corymbosa Pourr.	0.002	SSR			Asteraceae	Asterales	dicots	narrow	outcrossing	VU
Centaurea horrida Badaro	0.00704977	SSR			Asteraceae	Asterales	dicots	narrow	outcrossing (animal)	EN
Centaurea wiedemanniana Fisch. & Mey.	0.00316915	RAPD	0.00500554	RAPD	Asteraceae	Asterales	dicots	narrow
Centaurium erythraea Rafn	0.00045046	Allozyme			Gentianaceae	Gentianales	dicots	wide	outcrossing (animal)	LC
Centella asiatica (L.) Urban	0.00111879	ISSR	0.00390281	ISSR	Mackinlayaceae	Apiales	dicots	wide		LC
Cephalanthera longibracteata Blume	0.000784232	Allozyme			Orchidaceae	Asparagales	monocots	wide	mixed
Cephalanthera longifolia (L.) Fritsch	0.00424038	Allozyme			Orchidaceae	Asparagales	monocots	wide	outcrossing
Cephalanthera rubra (L.) Rich.	0.00305498	Allozyme			Orchidaceae	Asparagales	monocots	wide	outcrossing & asexual
Cerastium arvense L.	0.00558228	Allozyme	0.00715013	Allozyme	Caryophyllaceae	Caryophyllales	dicots	wide	outcrossing (animal)
Cerastium uniflorum Clairv.	0.00133333	AFLP	0.003	AFLP	Caryophyllaceae	Caryophyllales	dicots		outcrossing (animal)
Cerasus jamasakura (Siebold ex Koidz.) Ohba	0.00613008	SSR			Rosaceae	Rosales	dicots	narrow	outcrossing (animal)
Ceratiola ericoides Michx.	0.0018013	Allozyme	0.00256902	Allozyme	Ericaceae	Ericales	dicots	narrow
Ceratocapnos claviculata (L.) Lidén	4.81928e-05	AFLP	0.000269939	AFLP	Papaveraceae	Ranunculales	dicots	wide	selfing
Ceratophyllum demersum L.	0.0014359	Allozyme	0.00387857	Allozyme	Ceratophyllaceae	Ceratophyllales	dicots	wide	outcrossing & asexual	LC
Ceratophyllum echinatum A. Gray	0.000784232	Allozyme	0.00642588	Allozyme	Ceratophyllaceae	Ceratophyllales	dicots	narrow	outcrossing & asexual
Cercidiphyllum japonicum Siebold & Zucc.	0.00997605	SSR			Cercidiphyllaceae	Saxifragales	dicots	wide	outcrossing (wind)	NT
Cereus peruvianus Britton & Rose	0.00153219	Allozyme			Cactaceae	Caryophyllales	dicots
Cereus repandus Haw.	0.00541509	Allozyme	0.00670449	Allozyme	Cactaceae	Caryophyllales	dicots		outcrossing (animal)	LC
Ceriops australis (C.T.White) Ballment, T. J. Sm. & J. A. Stoddart	0.000783527	ISSR	0.00136773	ISSR	Rhizophoraceae	Malpighiales	dicots	narrow	mixed	LC
Ceriops decandra (Griff.) Ding Hou	0.000403292	ISSR	0.00517808	ISSR	Rhizophoraceae	Malpighiales	dicots	wide	mixed	NT
Ceriops tagal (Perr.) C. B. Rob.	0.00032958	ISSR	0.00187302	ISSR	Rhizophoraceae	Malpighiales	dicots	wide	mixed	LC
Chamaecrista coriacea (Benth.) H. S. Irwin & Barneby			0.000212121	Allozyme	Fabaceae	Fabales	dicots
Chamaecrista depauperata Conc., L. P. Queiroz & G. P. Lewi	0.00117529	Allozyme			Fabaceae	Fabales	dicots
Chamaecyparis obtusa (Siebold & Zucc.) Endl.	0.00709091	SSR			Cupressaceae	Pinales	gymnosperm	wide		NT
Chamaedaphne calyculata (L.) Moench	0.00114348	AFLP			Ericaceae	Ericales	dicots	wide	selfing & asexual
Chamaesyce skottsbergii (Sherff) Croizat & O. Deg.			0.00150893	RAPD	Euphorbiaceae	Malpighiales	dicots	narrow	outcrossing
Changiostyrax dolichocarpa C. J. Qi	0.00360224	SSR			Styracaceae	Ericales	dicots	narrow	outcrossing (animal)
Changium smyrnioides H. Wolff	0.00173034	ISSR	0.00442105	ISSR	Apiaceae	Apiales	dicots	narrow	outcrossing (animal)
Chimaphila japonica Miq.	0.00722581	Allozyme	0.00812621	Allozyme	Ericaceae	Ericales	dicots	wide	sexual & asexual
Chimonanthus nitens Oliv.	0.00260932	ISSR	0.00537984	ISSR	Calycanthaceae	Laurales	dicots	narrow	outcrossing
Chinanthus retusus Lindley & Paxton	0.00280952	Allozyme	0.00411962	Allozyme	Oleaceae	Lamiales	dicots	narrow
Chrysosplenium tetrandrum (Lund ex Malmgr.) Th. Fr.	0.00116793	ISSR	0.00128384	ISSR	Saxifragaceae	Saxifragales	dicots	wide	selfing
Cicer bijugum Rech. f.			0.000903226	AFLP	Fabaceae	Fabales	dicots
Cicer cuneatum A. Rich.			0.000793177	AFLP	Fabaceae	Fabales	dicots
Cicer echinospermum P. H. Davis			0.00121586	AFLP	Fabaceae	Fabales	dicots			LC
Cicer judaicum Boiss.			0.00157466	AFLP	Fabaceae	Fabales	dicots
Cicer pinnatifidum Jaub. & Spach			0.00121586	AFLP	Fabaceae	Fabales	dicots
Cicer reticulatum Ladiz.			0.00114348	AFLP	Fabaceae	Fabales	dicots
Cicer yamashitae Kitam.			0.000182741	AFLP	Fabaceae	Fabales	dicots
Cinnamomum migao H. W. Li	0.00326051	ISSR	0.00401338	ISSR	Lauraceae	Laurales	dicots	narrow	outcrossing (wind)
Cirsium arvense (L.) Scop.	0.00752381	SSR			Asteraceae	Asterales	dicots	wide	outcrossing
Cirsium hillii (Canby) Fernald	0.00195257	SSR			Asteraceae	Asterales	dicots	narrow
Cirsium spinosissimum (L.) Scop.	0.00133333	AFLP	0.00228571	AFLP	Asteraceae	Asterales	dicots		outcrossing (animal)
Cistus ladanifer L.	0.00130377	AFLP			Cistaceae	Malvales	dicots	wide	outcrossing
Cistus salviifolius L.			0.00108202	Allozyme	Cistaceae	Malvales	dicots	wide	outcrossing (animal)
Clarkia dudleyana (Abrams) J. F. Macbr.	0.00882955	Allozyme			Onagraceae	Myrtales	dicots	narrow	outcrossing (animal)
Clematis acerifolia Maxim.	0.00162931	Allozyme			Ranunculaceae	Ranunculales	dicots	narrow
Clematis crispa L.	0.00685146	Allozyme			Ranunculaceae	Ranunculales	dicots	wide
Clematis socialis Kral	0.00908596	Allozyme			Ranunculaceae	Ranunculales	dicots	narrow
Clidemia hirta (L.) D. Don	0.0011519	Allozyme	0.00609677	Allozyme	Melastomataceae	Myrtales	dicots	wide	mixed
Cochlearia polonica Frohl.	0.00206057	ISSR	0.00267858	ISSR	Brassicaceae	Brassicales	dicots	narrow	outcrossing (wind)	EN
Cochlearia pyrenaica DC.	0.00131853	AFLP	0.00221296	AFLP	Brassicaceae	Brassicales	dicots	narrow
Colchicum autumnale L.	0.00198601	AFLP	0.00526619	AFLP	Colchicaceae	Liliales	monocots	wide	outcrossing & asexual
Colubrina oppositifolia Brongn. ex H. Mann	0.0020463	RAPD	0.00291187	RAPD	Rhamnaceae	Rosales	dicots	narrow		CR
Commelina communis L.	0.00269328	AFLP			Commelinaceae	Commelinales	monocots	wide	selfing
Commiphora guillauminii H. Perrier	0.000847966	AFLP			Burseraceae	Sapindales	dicots	narrow	outcrossing (animal)
Commiphora harveyi (Engl.) Engl.	0.00104348	AFLP			Burseraceae	Sapindales	dicots	narrow	outcrossing (animal)
Commiphora wightii (Arn.) Bhandari	0.00137735	RAPD			Burseraceae	Sapindales	dicots	narrow
Consolida regalis Gray	0.00603367	RAPD			Ranunculaceae	Ranunculales	dicots	wide	outcrossing
Conyza sumatrensis (Retz.) E. Walker	0.00876423	ISSR			Asteraceae	Asterales	dicots	wide	selfing
Copaifera langsdorffii Desf.			0.0166916	SSR	Fabaceae	Fabales	dicots	narrow	mixed	LC
Coptis chinensis Franch. (wild)	0.00252893	ISSR	0.00541748	ISSR	Ranunculaceae	Ranunculales	dicots	narrow	mixed
Coptis deltoidea C. Y. Cheng & P. K. Hsiao	0.00159889	ISSR	0.00673153	ISSR	Ranunculaceae	Ranunculales	dicots	narrow
Coptis omeiensis (Chen) C. Y. Cheng	0.00607277	RAPD	0.00917673	RAPD	Ranunculaceae	Ranunculales	dicots	narrow
Coreopsis grandiflora Hogg ex Sweet	0.00246882	RAPD	0.00519454	RAPD	Asteraceae	Asterales	dicots	wide	outcrossing
Coreopsis integrifolia Poir.	0.00278256	Allozyme			Asteraceae	Asterales	dicots	narrow	outcrossing
Coreopsis pulchra F. Boynton	0.00126935	Allozyme			Asteraceae	Asterales	dicots	narrow	outcrossing
Coreopsis rosea Nutt.	0.00215325	Allozyme			Asteraceae	Asterales	dicots	narrow	outcrossing
Cornus florida L.	0.00425	SSR			Cornaceae	Cornales	dicots	wide	outcrossing
Cornus officinalis Torr. ex Dur.	0.00444532	ISSR	0.00580198	ISSR	Cornaceae	Cornales	dicots	wide
Corrigiola litoralis L.	0.000604938	Allozyme	0.00145989	Allozyme	Molluginaceae	Caryophyllales	dicots	wide	selfing
Crepis triasii (Cambess.) Fries	0.00602703	Allozyme	0.00820723	Allozyme	Asteraceae	Asterales	dicots	narrow	outcrossing (animal)
Croomia heterosepala (Bak.) Oku.	0.002	ISSR	0.00439685	ISSR	Stemonaceae	Pandanales	monocots	narrow	outcrossing (animal) & asexual
Croomia japonica Miq.	0.00130055	ISSR	0.006	ISSR	Stemonaceae	Pandanales	monocots	wide	outcrossing (animal) & asexual
Croton alabamensis E. A. Sm. ex Chapm.	0.0016612	AFLP			Euphorbiaceae	Malpighiales	dicots	narrow	mixed
Cryptomeria japonica (L. f.) D. Don	0.00569231	SSR	0.00383	Sequence	Cupressaceae	Pinales	gymnosperm	wide	outcrossing (wind)	NT
Cunninghamia konishii Hayata	0.00270228	AFLP			Cupressaceae	Pinales	gymnosperm	narrow	outcrossing (wind)	EN
Cunninghamia lanceolata (Lamb.) Hook.	0.00481379	AFLP			Cupressaceae	Pinales	gymnosperm	wide	outcrossing (wind)	LC
Cupressus chengiana S. Y. Hu	0.0027284	ISSR	0.00634884	ISSR	Cupressaceae	Pinales	gymnosperm	narrow	outcrossing (wind)	VU
Cuscuta europaea L.	0.0202574	Allozyme			Convolvulaceae	Solanales	dicots		outcrossing (animal)
Cycas debaoensis Y. C. Zhong et C. J. Chen	0.00229802	ISSR	0.00383439	ISSR	Cycadaceae	Cycadales	gymnosperm	narrow	outcrossing (animal)	CR
Cycas guizhouensis Lan & R. F. Zou	0.000888865	ISSR	0.00169859	ISSR	Cycadaceae	Cycadales	gymnosperm	narrow	outcrossing (animal)	VU
Cycas seemannii A. Br.	0.00126935	Allozyme	0.00336195	Allozyme	Cycadaceae	Cycadales	gymnosperm	narrow	outcrossing (animal)	VU
Cycas taitungensis Shen, Hill, Tsou & Chen	0.000852237	Allozyme			Cycadaceae	Cycadales	gymnosperm	narrow	outcrossing (animal)	EN
Cyclobalanopsis myrsinaefolia (Blume) Oerst	0.00243459	SSR	0.00273934	SSR	Fagaceae	Fagales	dicots	wide	outcrossing (wind)
Cymbidium hybridium L.			0.00288043	SSR	Orchidaceae	Asparagales	monocots
Cymbidium sinensis Wild			0.00785707	SSR	Orchidaceae	Asparagales	monocots
Cymodocea nodosa (Ucria) Asch.	0.001367	SSR			Cymodoceaceae	Alismatales	monocots	wide		LC
Cymophyllus fraserianus Ker Gawler	0.00267531	Allozyme	0.00316571	Allozyme	Cyperaceae	Poales	monocots	narrow
Cypripedium calceolus L.	0.0034186	Allozyme	0.00370588	Allozyme	Orchidaceae	Asparagales	monocots	wide	outcrossing (animal) & asexual
Cypripedium macranthos Swartz var. rebunense (Kudo) Miyabe & Kudo	0.00470379	Allozyme	0.00483026	Allozyme	Orchidaceae	Asparagales	monocots	narrow
Cytisus scoparius (L.) Link	0.00364972	SSR			Fabaceae	Fabales	dicots	wide	outcrossing (animal)
Dalbergia monticola Bosser & Rabevohitra	0.00540741	SSR	0.00911111	SSR	Fabaceae	Fabales	dicots	narrow	selfing	VU
Dalbergia nigra Allem. ex Benth.	0.00554717	SSR			Fabaceae	Fabales	dicots	narrow	outcrossing (animal)	VU
Dalbergia oliveri Gamble ex Prain			0.000948498	RAPD	Fabaceae	Fabales	dicots	narrow		EN
Dalea purpurea Vent.	0.00167819	Allozyme			Fabaceae	Fabales	dicots	wide	outcrossing
Daphne laureola L.	0.00172998	AFLP			Thymelaeaceae	Malvales	dicots	wide	outcrossing (animal)
Davidia involucrata Baillon	0.00395102	ISSR	0.00688305	ISSR	Cornaceae	Cornales	dicots	narrow	outcrossing (animal)
Daviesia mimosoides R. Br.	0.0145932	Allozyme			Fabaceae	Fabales	dicots	wide	outcrossing (animal)
Daviesia suaveolens Crisp.	0.00816667	Allozyme			Fabaceae	Fabales	dicots	narrow	outcrossing (animal)
Decodon verticillatus (L.) Elliot	0.0128164	Allozyme			Lythraceae	Myrtales	dicots	narrow	sexual & asexual
Delphinium bolosii C.Blanché & Molero	0.00145989	Allozyme			Ranunculaceae	Ranunculales	dicots	narrow	mixed
Delphinium montanum DC.	0.00934682	Allozyme			Ranunculaceae	Ranunculales	dicots	narrow	outcrossing (animal)
Delphinium pentagynum Lam. ssp. Formenteranum N. Torres, L. Sáez, Rosselló & C. Blanché	0.00460976	Allozyme	0.00436232	Allozyme	Ranunculaceae	Ranunculales	dicots	narrow	outcrossing (animal)
Delphinium staphisagria A. Gray	0.000966527	Allozyme	0.00126935	Allozyme	Ranunculaceae	Ranunculales	dicots	narrow	outcrossing (animal)
Dendrobium officinale Kimura & Migo	0.00485072	SSR	0.00583239	RAPD	Ranunculaceae	Ranunculales	dicots	narrow	outcrossing (animal)	CR
Dendrocalamus membranaceus Munro	0.00274641	ISSR	0.00392574	ISSR	Poaceae	Poales	monocots	wide	outcrossing
Desmanthus illinoensis (Michx.) MacMill. ex B. L. Rob. & Fernald	0.000158055	AFLP	0.0011291	AFLP	Fabaceae	Fabales	dicots	wide	selfing
Desmodium triflorum (L.) DC.	0.00358442	AFLP	0.0053913	AFLP	Fabaceae	Fabales	dicots	wide	sexual & asexual
Dianthus broteri Boiss. & Reut.	0.00115789	AFLP			Caryophyllaceae	Caryophyllales	dicots	narrow	outcrossing (animal)
Dianthus carthusianorum L.	0.00231213	RAPD	0.00270048	RAPD	Caryophyllaceae	Caryophyllales	dicots	wide	outcrossing (animal)
Dillwynia tenuifolia DC.	0.0161025	Allozyme			Fabaceae	Fabales	dicots	narrow	mixed
Dioon angustifolium Miq.	0.00585422	Allozyme			Zamiaceae	Cycadales	gymnosperm	narrow	outcrossing (animal)	VU
Dioon caputoi De Luca, Sabato & Vázq.Torres	0.0117103	Allozyme			Zamiaceae	Cycadales	gymnosperm	narrow	outcrossing (animal)	EN
Dioon merolae De Luca, Sabato & Vázq.Torres	0.0169061	Allozyme			Zamiaceae	Cycadales	gymnosperm	narrow	outcrossing (animal)	VU
Dioscorea japonica Thunb.			0.00489655	SSR	Dioscoreaceae	Dioscoreales	monocots	wide	sexual & asexual
Dioscorea praehensilis Benth.	0.00425	SSR			Dioscoreaceae	Dioscoreales	monocots
Dipterocarpus grandiflorus Slooten			0.00425	SSR	Dipterocarpaceae	Malvales	dicots	wide	outcrossing (animal)	CR
Dipteronia dyeriana Henry	0.00308296	AFLP	0.00525874	AFLP	Sapindaceae	Sapindales	dicots	narrow		EN
Dipteronia sinensis Oliv.	0.00317067	AFLP	0.00596138	AFLP	Sapindaceae	Sapindales	dicots	narrow		NT
Distemonanthus benthamianus Baillon	0.0023573	SSR			Fabaceae	Fabales	dicots	wide
Draba fladnizensis Wulfen			0.000994012	SSR	Brassicaceae	Brassicales	dicots		selfing
Draba nivalis Lilj.			0.000607562	SSR	Brassicaceae	Brassicales	dicots		selfing
Draba subcapitata Simmons			0.000478315	SSR	Brassicaceae	Brassicales	dicots		selfing
Dracocephalum austriacum L.	0.00264865	Allozyme	0.00370588	Allozyme	Lamiaceae	Lamiales	dicots	narrow	outcrossing (animal)
Dryas octopetala L.	0.00148315	AFLP	0.00211765	AFLP	Rosaceae	Rosales	dicots	wide	outcrossing (animal)
Dubautia laxa Hook. & Arn. ssp. bryanii (O. Deg. & Sherff) G. D. Carr	0.00208163	SSR			Asteraceae	Asterales	dicots		outcrossing
Dubautia laxa Hook. & Arn. ssp. hirsuta (Hillebr.) G. D. Carr	0.000702703	SSR			Asteraceae	Asterales	dicots		outcrossing
Dubautia laxa Hook. & Arn. ssp. laxa	0.00133333	SSR			Asteraceae	Asterales	dicots		outcrossing
Dubautia laxa Hook. & Arn. ssp. pseudoplantaginea (Skottsb.) G. D. Carr			0.00138983	SSR	Asteraceae	Asterales	dicots		outcrossing
Dyckia ibiramensis Reitz	0.0022816	Allozyme	0.0058886	Allozyme	Bromeliaceae	Poales	monocots	narrow	mixed
Dysosma pleiantha (Hance) Woodson	0.00174803	ISSR	0.00367677	ISSR	Berberidaceae	Ranunculales	dicots	narrow	outcrossing
Dysosma versipellis (Hance) M. Cheng ex Ying	0.00108615	AFLP	0.00320913	AFLP	Berberidaceae	Ranunculales	dicots	narrow	outcrossing	VU
Echinacea atrorubens Nutt.			0.0074521	AFLP	Asteraceae	Asterales	dicots	wide	outcrossing
Echinacea laevigata (C. L. Boynt. & Beadle) S. F. Blake	0.00276378	AFLP	0.00424036	AFLP	Asteraceae	Asterales	dicots	narrow	outcrossing (animal)
Echinacea pallida (Nutt.) Nutt.			0.00705669	AFLP	Asteraceae	Asterales	dicots	wide	outcrossing
Echinacea purpurea (L.) Moench			0.0103339	AFLP	Asteraceae	Asterales	dicots	wide	outcrossing
Echinosophora koreensis (Nakai) Nakai	0.00358794	ISSR			Fabaceae	Fabales	dicots	narrow	sexual & asexual
Echinospartum algibicum Talavera & Aparicio	0.00538191	Allozyme			Fabaceae	Fabales	dicots	narrow
Echinospartum barnadesii (Graells) Rothm.			0.0082887	Allozyme	Fabaceae	Fabales	dicots	narrow
Echinospartum boissieri (Spach) Rothm.			0.00585422	Allozyme	Fabaceae	Fabales	dicots	narrow		LC
Echinospartum ibericum Rivas Mart., Sánchez Mata & Sancho	0.00581992	Allozyme	0.00711245	Allozyme	Fabaceae	Fabales	dicots	narrow
Edraianthus serpyllifolius (Vis.) A. DC.	0.00216765	AFLP			Asteraceae	Asterales	dicots	narrow
Edraianthus tenuifolius (A. DC.) A. DC.	0.00160544	AFLP			Asteraceae	Asterales	dicots	wide
Eichhornia crassipes (Mart.) Solms	0.000626834	RAPD			Pontederiaceae	Commelinales	monocots	wide	asexual
Eichhornia paniculata (Spreng.) Solms.	0.000472393	Allozyme	0.0064	Sequence	Pontederiaceae	Commelinales	monocots	wide	mixed
Elaeagnus mollis Diels	0.00445161	SSR	0.00489655	SSR	Elaeagnaceae	Rosales	dicots	narrow	outcrossing	VU
Elaeis guineensis Jacq.	0.00171747	SSR			Arecaceae	Arecales	monocots	wide
Elliottia racemosa Muhl. ex Elliot	0.00141195	Allozyme	0.00210231	Allozyme	Ericaceae	Ericales	dicots	narrow	outcrossing & asexual
Elodea canadensis Michx.	0.000777778	SSR			Hydrocharitaceae	Alismatales	monocots	wide	asexual
Elymus alaskanus (Scribn. & Merr.) Á. Löve	0.000105528	Allozyme	0.00327746	Allozyme	Poaceae	Poales	monocots	wide	selfing
Elymus caninus L.	0.000265006	SSR	0.00254545	SSR	Poaceae	Poales	monocots	wide
Elymus fibrosus (Schrenk) Tzvelev	0.000673797	SSR	0.00242478	SSR	Poaceae	Poales	monocots	wide	selfing
Embothrium coccineum J. R. Forst. & G. Forst.	0.0043012	Allozyme	0.00575159	Allozyme	Proteaceae	Proteales	dicots	wide	outcrossing
Emmenopterys henryi Oliv.	0.00106997	ISSR	0.00330532	ISSR	Rubiaceae	Gentianales	dicots	narrow
Encephalartos latifrons Lehm.			0.00193243	AFLP	Zamiaceae	Cycadales	gymnosperm	narrow	outcrossing	CR
Epidendrum fulgens Brongn.	0.00421118	SSR			Orchidaceae	Asparagales	monocots	wide
Epilobium fleischeri Hochst.	0.00304938	RAPD			Onagraceae	Myrtales	dicots	wide	outcrossing (animal) & asexual
Epimedium pubescens Maxim.	0.00808587	Allozyme	0.00824791	Allozyme	Berberidaceae	Ranunculales	dicots	narrow	outcrossing (animal)
Epimedium sagittatum (Siebold. & Zucc.) Maxim.	0.0118638	Allozyme	0.0122805	Allozyme	Berberidaceae	Ranunculales	dicots	narrow	outcrossing (animal)
Epimedium wushanense T. S. Ying	0.00841176	Allozyme	0.00874504	Allozyme	Berberidaceae	Ranunculales	dicots	narrow	outcrossing (animal)
Epipactis helleborine (L.) Crantz	0.00630819	Allozyme	0.00874504	Allozyme	Orchidaceae	Asparagales	monocots	wide
Eriastrum densifolium (Benth.) H. Mason	0.00518182	RAPD	0.00620236	RAPD	Polemoniaceae	Ericales	dicots	narrow	outcrossing
Erica coccinea L.	0.00514286	SSR			Ericaceae	Ericales	dicots	wide
Erigeron ovalifolium (Canby) Jones var. vineum	0.00492593	Allozyme	0.00525	Allozyme	Asteraceae	Asterales	dicots	narrow	outcrossing
Erigeron parishii A. Gray	0.0043012	Allozyme	0.00492593	Allozyme	Asteraceae	Asterales	dicots	narrow
Erodium antariense Rouy			0.00244043	AFLP	Geraniaceae	Geraniales	dicots
Erodium foetidum (L.) L'Hér.	0.00247527	AFLP			Geraniaceae	Geraniales	dicots
Erodium glandulosum (Cav.) Willd.	0.00238849	AFLP			Geraniaceae	Geraniales	dicots
Erodium lucidum Lapeyr.	0.00180898	AFLP			Geraniaceae	Geraniales	dicots
Erodium paularense Fern. Gonz. & Izco	0.00145291	AFLP			Geraniaceae	Geraniales	dicots			EN
Erodium rodiei (Braun-Blanq.) Poirion			0.00188889	AFLP	Geraniaceae	Geraniales	dicots
Erodium rupestre (Cav.) Marcet	0.000538462	Allozyme			Geraniaceae	Geraniales	dicots	narrow	outcrossing (animal)
Erophaca baetica (L.) Boiss. ssp. baetica	0.00163636	AFLP			Fabaceae	Fabales	dicots	narrow
Eryngium alpinum L.	0.00136134	SSR			Apiaceae	Apiales	dicots	wide	outcrossing (animal)	NT
Eryngium campestre L.	0.00281481	AFLP			Apiaceae	Apiales	dicots	wide
Eryngium cuneifolium Small	0.00197593	Allozyme	0.0024375	Allozyme	Apiaceae	Apiales	dicots	narrow	outcrossing (animal)
Eryngium maritimum L.	0.00198601	AFLP			Apiaceae	Apiales	dicots	wide
Erythronium montanum S. Wats.	0.00185092	Allozyme	0.00256902	Allozyme	Liliaceae	Liliales	monocots	wide	outcrossing (animal)
Erythroxylum havanense Jacquin	0.0098471	RAPD			Erythroxylaceae	Malpighiales	dicots		outcrossing (animal)
Erythroxylum pusillum ms.	0.003	SSR			Erythroxylaceae	Malpighiales	dicots	narrow	outcrossing & asexual
Eucalyptus aggregata H. Deane & Maiden	0.0040241	SSR			Myrtaceae	Myrtales	dicots	narrow
Eucalyptus camaldulensis Dehnh.			0.0122857	SSR	Myrtaceae	Myrtales	dicots	wide
Eucalyptus citriodora (Hook.) K. D. Hill & L. A. S. Johnson			0.000952472	ISSR	Myrtaceae	Myrtales	dicots
Eucalyptus dunnii Maiden			0.00591045	AFLP	Myrtaceae	Myrtales	dicots
Eucalyptus globulus Labill.	0.00709091	SSR			Myrtaceae	Myrtales	dicots	narrow	mixed
Eucalyptus grandis W. Hill ex Maiden			0.00122236	ISSR	Myrtaceae	Myrtales	dicots
Eucalyptus obliqua L'Hér.	0.008	SSR	0.00976471	SSR	Myrtaceae	Myrtales	dicots	wide
Eucalyptus pellita F. V. Muell.	0.00517801	Allozyme	0.00694709	Allozyme	Myrtaceae	Myrtales	dicots
Eucalyptus rubida H. Deane & Maiden	0.00684956	SSR			Myrtaceae	Myrtales	dicots	wide
Eucalyptus scias L. A. S. Johnson & K. D. Hill	0.0068437	Allozyme	0.00877541	Allozyme	Myrtaceae	Myrtales	dicots
Eucalyptus tereticornis Sm.			0.0113333	SSR	Myrtaceae	Myrtales	dicots	wide
Eucalyptus urophylla S. T. Blake			0.00145424	ISSR	Myrtaceae	Myrtales	dicots
Eucommia ulmoides Oliv.	0.00223488	AFLP			Eucommiaceae	Garryales	dicots	wide	outcrossing (wind)	NT
Eugenia dysenterica O. Berg	0.00158423	SSR			Myrtaceae	Myrtales	dicots	wide	outcrossing (animal)
Eulophia sinensis Miq.	2.5203e-06	Allozyme	2.5203e-06	Allozyme	Orchidaceae	Asparagales	monocots		outcrossing
Eupatorium adenophorum (Spreng.) King & H. Rob.	0.0017457	AFLP	0.00277833	AFLP	Asteraceae	Asterales	dicots	wide	asexual
Euphrasia stricta D. Wolff ex J. F. Lehm.			0.00245783	AFLP	Orobanchaceae	Lamiales	dicots	wide	mixed
Euptelea pleiospermum Hook. f. & Thomson	0.00327704	SSR			Eupteleaceae	Ranunculales	dicots	wide	outcrossing (wind)	LC
Eurya emarginata (Thunb.) Makino	0.00882955	Allozyme	0.00992784	Allozyme	Theaceae	Ericales	dicots	wide
Eurya nitida Korth.			0.00311491	ISSR	Theaceae	Ericales	dicots
Euryale ferox Salisb.			0.000829522	Allozyme	Nymphaeaceae	Nymphaeales	dicots	wide	selfing	LC
Eurycorymbus cavaleriei (A. Leve.) Rehder & Hand.-Mazz.	0.00546269	SSR			Sapindaceae	Sapindales	dicots	wide	outcrossing (animal)	NT
Euryodendron excelsum H. T. Chang			0.0080195	ISSR	Theaceae	Ericales	dicots	narrow		CR
Euterpe edulis Mart.	0.00808587	Allozyme			Arecaceae	Arecales	monocots	wide	outcrossing (animal)
Fagopyrum cymosum (Trev.) Meisn.	0.00562464	RAPD	0.00733792	RAPD	Polygonaceae	Caryophyllales	dicots	wide
Fagus sylvatica L.	0.00626446	SSR			Fagaceae	Fagales	dicots	wide	outcrossing (wind)
Fallopia japonica Houtt. (Ronse Decr.)	0.00115457	SSR			Polygonaceae	Caryophyllales	dicots	wide	sexual & asexual
Ferula loscosii (Lange) Willk	0.003	Allozyme	0.00376415	Allozyme	Apiaceae	Apiales	dicots	narrow	outcrossing
Festuca idahoensis Elmer			0.00499593	ISSR	Poaceae	Poales	monocots	wide	sexual & asexual
Festuca pratensis Huds.	0.00133297	RAPD			Poaceae	Poales	monocots	wide	outcrossing
Ficus carica L.	0.001861	SSR	0.00213223	SSR	Moraceae	Rosales	dicots	wide	outcrossing (animal)	LC
Ficus pumila L.	0.00150877	SSR			Moraceae	Rosales	dicots	wide	outcrossing (animal)
Flaveria bidentis (L.) Kuntze	0.00310446	ISSR	0.0099439	ISSR	Asteraceae	Asterales	dicots	wide
Flourensia cernua DC.	0.0134262	Allozyme			Asteraceae	Asterales	dicots	wide	outcrossing (wind)
Fragaria virginiana Duchesne			0.0115135	SSR	Rosaceae	Rosales	dicots	wide	mixed
Fraxinus excelsior L.	0.00898901	SSR			Oleaceae	Lamiales	dicots	wide	mixed
Fraxinus lanuginosa Koidz.	0.00845302	Allozyme			Oleaceae	Lamiales	dicots	wide	mixed
Fraxinus mandshurica Rupr.	0.00258716	SSR			Oleaceae	Lamiales	dicots	wide	outcrossing (wind)
Fraxinus ornus L.			0.0037241	SSR	Oleaceae	Lamiales	dicots	wide	outcrossing (animal)
Fritillaria anhuiensis S. C. Chen et S. F. Yin			0.00132903	ISSR	Liliaceae	Liliales	monocots
Fritillaria cirrhosa D. Don	0.00444737	AFLP	0.00707487	AFLP	Liliaceae	Liliales	monocots	narrow	outcrossing
Fritillaria imperialis L.	0.00194253	RAPD	0.00388312	RAPD	Liliaceae	Liliales	monocots		outcrossing (animal)
Fritillaria thunbergii Miq.	0.00227907	ISSR	0.00450139	ISSR	Liliaceae	Liliales	monocots		outcrossing
Galium catalinense A. Gray ssp. acrispum Dempster	0.0019604	SSR	0.00244444	SSR	Rubiaceae	Gentianales	dicots	narrow	outcrossing
Gastrodia elata Blume	0.00439299	Allozyme	0.00595764	Allozyme	Orchidaceae	Asparagales	monocots	wide	outcrossing (animal) & asexual	VU
Gaultheria fragrantissima Wall.	0.00580198	ISSR	0.0142828	ISSR	Ericaceae	Ericales	dicots	narrow	outcrossing (animal)
Gentiana alpina Vill.	0.00254545	AFLP			Gentianaceae	Gentianales	dicots	narrow	outcrossing (animal)
Gentiana nivalis L.	0.000903226	AFLP	0.00281481	AFLP	Gentianaceae	Gentianales	dicots		outcrossing (animal)
Gentiana straminea Maxim.	0.00291187	RAPD			Gentianaceae	Gentianales	dicots	wide	mixed
Gentianella aspera (Hegetschw. & Heer) Skalický, Chrtek & J. Gill	0.00198601	AFLP			Gentianaceae	Gentianales	dicots	narrow	outcrossing (animal)
Geranium pratense R. Knuth	0.00221801	AFLP			Geraniaceae	Geraniales	dicots	wide	outcrossing (animal)
Geum montanum L.	0.000903226	AFLP	0.00163636	AFLP	Rosaceae	Rosales	dicots		outcrossing (animal)
Geum reptans L.	0.0034557	RAPD	0.00245783	AFLP	Rosaceae	Rosales	dicots	wide	outcrossing (animal)
Geum urbanum L.	0.000597403	SSR			Rosaceae	Rosales	dicots	wide	selfing
Ginkgo biloba L.	0.00600307	RAPD	0.00787683	RAPD	Ginkgoaceae	Ginkgoales	gymnosperm	wide	outcrossing	EN
Glandora oleifolia (Lapeyr.) D. C. Thomas	0.00108202	Allozyme	0.00205159	Allozyme	Boraginaceae	Lamiales	dicots	narrow	mixed
Glycine soja Siebold & Zucc.	0.00114465	SSR	0.00276	Sequence	Fabaceae	Fabales	dicots	wide	selfing
Glycyrrhiza uralensis Fisch.	0.00383439	ISSR	0.00512568	ISSR	Fabaceae	Fabales	dicots	wide
Glyptostrobus pensilis (Staunton ex D. Don) K. Koch	0.00183531	ISSR	0.00333961	ISSR	Cupressaceae	Pinales	gymnosperm	narrow	outcrossing (wind)	CR
Goodyera procera (Ker Gawl.) Hook.	0.00165372	Allozyme	0.00370588	Allozyme	Orchidaceae	Asparagales	monocots	narrow	mixed
Grevillea caleyi R. Br.	0.00268788	AFLP			Proteaceae	Proteales	dicots	narrow	mixed
Grevillea macleayana (McGill.) Olde & Marriott	0.00198406	SSR			Proteaceae	Proteales	dicots	narrow	mixed
Grevillea repens F. Muell. ex Meisn.	0.00272813	SSR			Proteaceae	Proteales	dicots	narrow	outcrossing & asexual
Guaiacum sanctum L.	0.00904292	Allozyme	0.0102966	Allozyme	Zygophyllaceae	Zygophyllales	dicots	narrow	mixed	EN
Guarea guidonia (L.) Sleumer	0.000702703	SSR			Meliaceae	Sapindales	dicots	wide	mixed
Guizotia arborescens Friis	0.00229412	RAPD	0.00505556	RAPD	Asteraceae	Asterales	dicots	narrow	outcrossing
Guizotia scabra (Vis.) Chiov. ssp. scabra (Vis.) Chiov.	0.00266265	RAPD	0.00388312	RAPD	Asteraceae	Asterales	dicots	wide	outcrossing
Guizotia scabra (Vis.) Chiov. ssp. schimperi (Sch. Bip.) Baagoe	0.00266265	RAPD	0.00366667	RAPD	Asteraceae	Asterales	dicots	wide	outcrossing
Guizotia villosa Sch. Bip.	0.00304938	RAPD	0.00388312	RAPD	Asteraceae	Asterales	dicots	narrow	outcrossing
Guizotia zavattarii Lanza	0.00266265	RAPD	0.00505556	RAPD	Asteraceae	Asterales	dicots	narrow	outcrossing
Gymnadenia conopsea (L.) R. Br.	0.00540741	SSR			Orchidaceae	Asparagales	monocots	wide	mixed
Gymnadenia odoratissima (L.) Rich.	0.00216667	SSR			Orchidaceae	Asparagales	monocots	narrow	mixed	LC
Gynostemma pentaphyllum (Thunb.) Makino	0.000369291	ISSR	0.00498048	ISSR	Cucurbitaceae	Cucurbitales	dicots	wide	outcrossing & asexual
Gypsophila fastigiata L.	0.00939074	Allozyme	0.00970175	Allozyme	Caryophyllaceae	Caryophyllales	dicots	wide	outcrossing (animal)
Gypsophila repens L.	0.00133333	AFLP	0.00195349	AFLP	Caryophyllaceae	Caryophyllales	dicots		outcrossing (animal)
Hagenia abyssinica Willd.	0.00290683	AFLP	0.00933333	ISSR	Rosaceae	Rosales	dicots	wide	outcrossing (wind)
Halodule wrightii Ascherson	0.00160346	RAPD			Cymodoceaceae	Alismatales	monocots			LC
Hanabusaya asiatica (Nakai) Nakai	0.00467237	Allozyme	0.00581992	Allozyme	Campanulaceae	Asterales	dicots	narrow	outcrossing (animal)
Haplostachys haplostachya (A. Gray) H. St. John	0.00231213	RAPD	0.00258753	RAPD	Lamiaceae	Lamiales	dicots	narrow
Hardenbergia violacea (Schneev.) Stearn	0.00163636	AFLP	0.00245783	AFLP	Fabaceae	Fabales	dicots	narrow
Hedychium spicatum Buch. Ham.	0.0123333	Allozyme			Zingiberaceae	Zingiberales	monocots	narrow	outcrossing (animal) & asexual
Hedyotis chrysotricha (Palib.) Merr.	0.00142466	SSR			Rubiaceae	Gentianales	dicots	wide	outcrossing (animal)
Hedyotis strigulosa (Bartl. ex DC.) Fosberg var. coreana (H. Lév.) T. Yamaz.	0.000169355	Allozyme			Rubiaceae	Gentianales	dicots		selfing
Hedyotis strigulosa (Bartl. ex DC.) Fosberg var. luxurians (H. Lév.) T. Yamaz.	0.000472393	Allozyme			Rubiaceae	Gentianales	dicots		selfing
Hedyotis strigulosa (Bartl. ex DC.) Fosberg var. parvifolia (Hook. & Arn.) T.Yamaz.	0.00134043	Allozyme			Rubiaceae	Gentianales	dicots		selfing
Hedysarum coronarium L.			0.00307317	ISSR	Fabaceae	Fabales	dicots	wide
Hedysarum hedysaroides (L.) Schinz. & Thell.	0.0017931	AFLP	0.00490141	AFLP	Fabaceae	Fabales	dicots	wide	outcrossing (animal)
Hedysarum laeve Maxim.	0.00235929	Allozyme	0.0023853	Allozyme	Fabaceae	Fabales	dicots	wide	sexual & asexual
Hedysarum pogonocarpum Boiss. ssp. haradjianii	0.00952326	Allozyme			Fabaceae	Fabales	dicots	narrow
Hedysarum pogonocarpum Boiss. ssp. pogonocarpum	0.00891453	Allozyme			Fabaceae	Fabales	dicots	narrow
Hedysarum spinosissimum L. ssp. capitaturn	0.0023853	Allozyme			Fabaceae	Fabales	dicots	wide	outcrossing
Hedysarum spinosissimum L. ssp. euspinosissirnurn	0.00134043	Allozyme			Fabaceae	Fabales	dicots	wide	selfing
Helianthus annuus L. (wild)			0.0234	Sequence	Asteraceae	Asterales	dicots	wide	outcrossing
Helianthus petiolaris Nutt.	0.00546269	SSR	0.03318	Sequence	Asteraceae	Asterales	dicots	wide	outcrossing
Helmholtzia glaberrima (Hook. f.) Caruel	0.004	AFLP			Philydraceae	Commelinales	monocots	narrow	selfing
Heloniopsis orientalis (Thunb.) C. Tanaka	0.00681057	SSR			Melanthiaceae	Liliales	monocots	narrow	mixed
Hemarthria compressa (L. f.) R. Br.	0.00185504	ISSR	0.00413472	ISSR	Poaceae	Poales	monocots	wide	selfing	LC
Hemerocallis thunbergii Bak.	0.00820723	Allozyme			Xanthorrhoeaceae	Asparagales	monocots	narrow	outcrossing
Hemigenia exilis S. Moore	0.00586792	RAPD	0.00790032	RAPD	Lamiaceae	Lamiales	dicots	narrow	outcrossing (animal)
Heptacodium miconioides Rehder	0.00330503	RAPD	0.00545018	RAPD	Caprifoliaceae	Dipsacales	dicots	narrow	mixed	VU
Heracleum mantegazzianum Sommier & Levier	0.00114465	SSR	0.00255581	SSR	Apiaceae	Apiales	dicots	wide	mixed
Heritiera littoralis Aiton	0.00195349	AFLP	0.003	AFLP	Malvaceae	Malvales	dicots	wide		LC
Hibiscus glaber Matsum.			0.00302513	SSR	Malvaceae	Malvales	dicots	narrow
Hibiscus hamabo Siebold & Zucc.			0.000642008	SSR	Malvaceae	Malvales	dicots	narrow
Hibiscus pernambucensis Arruda			0.00112012	SSR	Malvaceae	Malvales	dicots	wide
Hibiscus tiliaceus L.	0.00298127	AFLP	0.00319481	SSR	Malvaceae	Malvales	dicots	wide	outcrossing
Himantoglossum hircinum (L.) Spreng.	0.00216765	AFLP			Orchidaceae	Asparagales	monocots	wide
Hippocrepis valentina Boiss.	0.00195082	Allozyme	0.00241137	Allozyme	Fabaceae	Fabales	dicots	narrow	outcrossing (animal)	LC
Hippophae rhamnoides L. ssp. gyantsensis Rousi			0.00222624	ISSR	Elaeagnaceae	Rosales	dicots
Hippophae rhamnoides L. ssp. rhamnoides	0.00245779	RAPD			Elaeagnaceae	Rosales	dicots
Hippophae rhamnoides L. ssp. sinensis Rousi	0.002625	RAPD	0.00365448	ISSR	Elaeagnaceae	Rosales	dicots
Hippophae rhamnoides L. ssp. yunnanensis Rousi	0.00209872	RAPD	0.00444966	RAPD	Elaeagnaceae	Rosales	dicots
Hordeum spontaneum K. Koch	0.00209836	SSR	0.01673	Sequence	Poaceae	Poales	monocots	wide	selfing
Hornungia alpina (L.) R. Br.	0.000903226	AFLP	0.00211765	AFLP	Brassicaceae	Brassicales	dicots		outcrossing (animal)
Hosta jonesii M. G. Chung	0.00764939	Allozyme			Asparagaceae	Asparagales	monocots	narrow	sexual & asexual
Howellia aquatilis A. Gray	0.0045221	AFLP	0.00784127	AFLP	Asteraceae	Asterales	dicots	narrow	selfing
Humboldtia brunonis Wall.	0.00129386	ISSR	0.00188382	ISSR	Fabaceae	Fabales	dicots	narrow	outcrossing (animal) & asexual
Hymenocallis coronaria Kunth	0.000773925	SSR			Amaryllidaceae	Asparagales	monocots	narrow
Hymenoxys herbacea Greene	0.00313793	Allozyme			Asteraceae	Asterales	dicots	narrow	outcrossing & asexual
Hypericum nummularium L.	0.00378947	AFLP			Hypericaceae	Malpighiales	dicots	wide
Hypericum perforatum L.	0.00386122	RAPD	0.00675684	RAPD	Hypericaceae	Malpighiales	dicots	wide
Hypochaeris radicata L.	0.0146667	SSR			Asteraceae	Asterales	dicots	wide	outcrossing (animal)
Hypochaeris uniflora Vill.	0.00118681	AFLP	0.0017931	AFLP	Asteraceae	Asterales	dicots		outcrossing (animal)
Hypopitys monotropa Crantz	0.00217537	SSR			Ericaceae	Ericales	dicots	wide	selfing
Imperata cylindrica (L.) P. Beauv.	0.00148315	AFLP			Poaceae	Poales	monocots	wide	outcrossing
Incarvillea younghusbandii Sprague	0.00080683	AFLP	0.00252785	AFLP	Bignoniaceae	Lamiales	dicots	narrow	mixed
Iris aphylla L.	0.00139646	RAPD			Iridaceae	Asparagales	monocots	wide
Iris atrofusca Baker	0.00454386	RAPD			Iridaceae	Asparagales	monocots	narrow	outcrossing
Iris cristata Aiton	0.00521723	Allozyme	0.00630819	Allozyme	Iridaceae	Asparagales	monocots	narrow	outcrossing
Iris haynei (Baker) Mallet	0.00444966	RAPD			Iridaceae	Asparagales	monocots	narrow	outcrossing
Jatropha curcas L.	0.00303948	RAPD	0.00447077	RAPD	Euphorbiaceae	Malpighiales	dicots	wide	mixed
Juglans mandshurica Maxim.			0.00511744	SSR	Juglandaceae	Fagales	dicots	wide	outcrossing (wind)
Juglans sinensis (DC.) Dode	0.00202632	Allozyme			Juglandaceae	Fagales	dicots
Juncus atratus Krocker	0.00271698	SSR			Juncaceae	Poales	monocots	wide	mixed
Juncus trifidus L.	0.00148315	AFLP	0.00245783	AFLP	Juncaceae	Poales	monocots	wide	outcrossing (wind)
Juniperus brevifolia (Seub.) Antoine	0.00325	RAPD	0.00669697	RAPD	Cupressaceae	Pinales	gymnosperm	narrow	outcrossing (wind)	VU
Juniperus communis L.	0.00302513	SSR	0.00770443	AFLP	Cupressaceae	Pinales	gymnosperm	wide	outcrossing (wind)	LC
Juniperus convallium Rehder & E. H. Wilson			0.00211	Sequence	Cupressaceae	Pinales	gymnosperm	narrow	outcrossing (wind)	LC
Juniperus coreana Nakai	0.00448544	Allozyme	0.00521723	Allozyme	Cupressaceae	Pinales	gymnosperm	narrow	outcrossing (wind)
Juniperus phoenicea L.	0.00279587	RAPD	0.00293137	RAPD	Cupressaceae	Pinales	gymnosperm	wide	outcrossing (wind)	LC
Juniperus przewalskii Kom.			0.00383	Sequence	Cupressaceae	Pinales	gymnosperm	narrow	outcrossing (wind)	LC
Juniperus saltuaria Rehder & E. H. Wilson			0.00415	Sequence	Cupressaceae	Pinales	gymnosperm	narrow	outcrossing (wind)	LC
Juniperus tibetica Kom.			0.00292	Sequence	Cupressaceae	Pinales	gymnosperm	narrow	outcrossing (wind)	VU
Kandelia candel (L.) Druce	0.000716649	Allozyme	0.00563359	SSR	Rhizophoraceae	Malpighiales	dicots	wide	mixed	LC
Kernera saxatilis (L.) Sweet	0.00134816	AFLP			Brassicaceae	Brassicales	dicots	narrow	outcrossing (animal)
Kirengeshoma palmata Yatabe	0.00592308	Allozyme	0.0118638	Allozyme	Hydrangeaceae	Cornales	dicots	narrow	outcrossing & asexual
Kmeria septentrionalis Dandy	0.00328662	AFLP	0.0039787	AFLP	Magnoliaceae	Magnoliales	dicots	narrow	outcrossing (animal)
Krascheninnikovia ceratoides (L.) Gueldenst.	0.00993162	ISSR	0.0113623	ISSR	Amaranthaceae	Caryophyllales	dicots	wide	outcrossing (wind)
Lactuca serriola L.	0.000861736	AFLP	0.00144828	SSR	Asteraceae	Asterales	dicots	wide	selfing
Laelia rubescens Lindl.	0.00327746	Allozyme	0.00442373	Allozyme	Orchidaceae	Asparagales	monocots	wide	outcrossing (animal) & asexual
Laelia speciosa (Kunth) Schltr.	0.0129806	Allozyme			Orchidaceae	Asparagales	monocots	narrow	outcrossing (animal)
Lagarostrobos franklinii (Hook. f.) Quinn	0.00427076	Allozyme			Podocarpaceae	Pinales	gymnosperm	narrow	outcrossing	LC
Lambertia orbifolia C. A. Gardner	0.00259551	Allozyme			Proteaceae	Proteales	dicots	narrow	outcrossing (animal)
Lamiophlomis rotata (Benth.) Kudo.	0.00258753	RAPD	0.00523282	RAPD	Lamiaceae	Lamiales	dicots	narrow
Larix decidua Mill.	0.00391103	Allozyme	0.0047	Sequence	Pinaceae	Pinales	gymnosperm	wide	outcrossing (wind)	LC
Larix kaempferi (Lamb.) Carr.	0.00575194	SSR			Pinaceae	Pinales	gymnosperm	wide	outcrossing (wind)	LC
Larix lyallii Parl.	0.00143643	SSR			Pinaceae	Pinales	gymnosperm	narrow	outcrossing (wind)	LC
Larix occidentalis Nutt.	0.0027619	SSR			Pinaceae	Pinales	gymnosperm	wide	outcrossing (wind)	LC
Larix potaninii Batalin var. chinensis (Beissn.) L. K. Fu & Nan Li	0.00311902	SSR	0.00415006	SSR	Pinaceae	Pinales	gymnosperm	narrow	outcrossing (wind)
Lasthenia conjugens Greene	0.00365448	ISSR	0.00449406	ISSR	Asteraceae	Asterales	dicots	narrow	outcrossing (animal)
Lathyrus vernus (L.) Bernh.	0.00816667	Allozyme	0.0115077	Allozyme	Fabaceae	Fabales	dicots	wide	outcrossing (animal)
Leavenworthia alabamica Rollins	0.0164332	Allozyme	0.026836	Allozyme	Brassicaceae	Brassicales	dicots		mixed
Leavenworthia crassa Rollins	0.00820723	Allozyme	0.0154583	Allozyme	Brassicaceae	Brassicales	dicots		mixed
Leavenworthia stylosa A. Gray	0.019856	Allozyme	0.0231176	Allozyme	Brassicaceae	Brassicales	dicots		outcrossing
Leersia hexandra Sw.	0.00254846	ISSR	0.00494452	ISSR	Poaceae	Poales	monocots	wide	sexual & asexual
Lemurophoenix halleuxii J. Dransf.	0.000758621	SSR			Arecaceae	Arecales	monocots	narrow		EN
Lens culinaris Medik. ssp. orientalis (Boiss.) Ponert (wild)			0.00674	Sequence	Fabaceae	Fabales	dicots		selfing
Lens ervoides (Brign.) Grande.			0.00251624	Allozyme	Fabaceae	Fabales	dicots		selfing
Lens lamottei Czefr.			0.000105528	Allozyme	Fabaceae	Fabales	dicots		selfing
Lens nigricans (M. Bieb.) Godr.			0.00634375	Allozyme	Fabaceae	Fabales	dicots		selfing
Lens odemensis Ladiz.			0.00470379	Allozyme	Fabaceae	Fabales	dicots		selfing
Lepidium draba L.	0.00279779	RAPD			Brassicaceae	Brassicales	dicots	wide
Leptodactylon californicum Hook. & Arn.	0.00492593	Allozyme			Polemoniaceae	Ericales	dicots	narrow
Leucothrinax morrisii (H. Wendl.) C. Lewis & Zona			0.00385714	ISSR	Arecaceae	Arecales	monocots	narrow
Liatris helleri Porter	0.0058886	Allozyme	0.00800552	Allozyme	Asteraceae	Asterales	dicots	narrow	outcrossing (animal)
Ligularia sibirica (L.) Cass.	0.0118125	Allozyme			Asteraceae	Asterales	dicots	wide	mixed
Ligusticum mutellinoides Vill.	0.00281481	AFLP	0.00443836	AFLP	Apiaceae	Apiales	dicots		outcrossing (animal)
Lilium maculatum Thunb. var. bukosanense (Honda) H. Hara	0.00328395	ISSR			Liliaceae	Liliales	monocots	narrow	selfing
Lilium martagon L.	0.0034557	RAPD			Liliaceae	Liliales	monocots	wide	outcrossing
Lilium philadelphicum L.	0.00445161	SSR			Liliaceae	Liliales	monocots	wide	outcrossing (animal)
Lilium tsingtauense Gilg	0.00358794	ISSR	0.00420546	ISSR	Liliaceae	Liliales	monocots	narrow
Limnanthes floccosa Howell ssp. californica Arroyo	0.000469136	SSR			Limnanthaceae	Brassicales	dicots	narrow	selfing
Limonium narbonense Miller	0.00201606	SSR	0.00238596	SSR	Plumbaginaceae	Caryophyllales	dicots	narrow	outcrossing (animal)
Limonium sinense (Girard) Kuntze	0.00290683	AFLP	0.00475978	AFLP	Plumbaginaceae	Caryophyllales	dicots	narrow	outcrossing (animal)
Linaria aeruginea (Gouan) Cav. ssp. aeruginea	0.00692553	Allozyme	0.00776712	Allozyme	Plantaginaceae	Lamiales	dicots	narrow	outcrossing (animal)
Linaria aeruginea ssp. cardonica (Font Quer) Sáez & Sainz	0.00613178	Allozyme	0.00627273	Allozyme	Plantaginaceae	Lamiales	dicots	narrow	outcrossing (animal)
Linaria arvensis (L.) Desf.	0.0023853	Allozyme	0.00294527	Allozyme	Plantaginaceae	Lamiales	dicots	wide	selfing
Linaria depauperata Leresche ex Lange ssp. depauperata	0.00685146	Allozyme	0.00722581	Allozyme	Plantaginaceae	Lamiales	dicots	narrow	outcrossing (animal)
Linaria depauperata ssp. hegelmaieri (Lange) De la Torre, Alcaraz & Crespo	0.00634375	Allozyme	0.00620207	Allozyme	Plantaginaceae	Lamiales	dicots	narrow	outcrossing (animal)
Linaria depauperata ssp. ilergabona (Crespo & Aran) Sáez	0.00551515	Allozyme	0.00575159	Allozyme	Plantaginaceae	Lamiales	dicots	narrow	outcrossing (animal)
Linaria micrantha (Cav.) Hoffmanns. & Link	0.00119873	Allozyme	0.00448544	Allozyme	Plantaginaceae	Lamiales	dicots	wide	selfing
Linaria simplex (Willd.) DC.	0.000671827	Allozyme	0.0024375	Allozyme	Plantaginaceae	Lamiales	dicots	wide	selfing
Lindera benzoin L.	0.00354017	SSR			Plantaginaceae	Lamiales	dicots	wide	outcrossing
Liparis makinoana Schlechter	0.00974671	Allozyme			Orchidaceae	Asparagales	monocots	narrow	outcrossing
Lippia origanoides H. B. K.	0.00451914	AFLP	0.0056468	AFLP	Verbenaceae	Lamiales	dicots	narrow
Liriodendron tulipifera L.	0.00571756	Allozyme	0.00943478	Allozyme	Magnoliaceae	Magnoliales	dicots	wide	outcrossing (animal)
Listera ovata (L.) Bluff & Fingerh.	0.000989529	Allozyme			Orchidaceae	Asparagales	monocots	wide	outcrossing (animal)
Lithocarpus densiflorus (Hook. & Arn.) Rehder	0.00230108	SSR			Fagaceae	Fagales	dicots	narrow
Lithophragma maximum Bacig.	0.000594034	SSR	0.00203226	SSR	Saxifragaceae	Saxifragales	dicots	narrow
Lithospermum canescens (Michx.) Lehm.	0.00513307	AFLP	0.00537368	AFLP	Boraginaceae	Lamiales	dicots	narrow	mixed
Livistona carinensis (Chiov.) Dransf. & Uhl	4.70829e-05	SSR			Arecaceae	Arecales	monocots	narrow		VU
Lloydia serotina (L.) Rchb.	0.0014359	Allozyme			Liliaceae	Liliales	monocots	wide
Lobelia giberroa Hemsl.	0.000772751	AFLP			Campanulaceae	Asterales	dicots	wide	outcrossing (animal)
Lobelia rhynchopetalum Hemsl.	0.00212903	ISSR	0.00832855	ISSR	Campanulaceae	Asterales	dicots	narrow
Loiseleuria procumbens Desv.	0.00228571	AFLP	0.004	AFLP	Ericaceae	Ericales	dicots	wide	outcrossing (animal)
Lomatia polymorpha R. Br.			0.00439299	Allozyme	Proteaceae	Proteales	dicots
Lomatia tinctoria (Labill.) R. Br.	0.00324942	Allozyme	0.00439299	Allozyme	Proteaceae	Proteales	dicots
Lonicera japonica Thunb.	0.0073057	Allozyme	0.0084861	Allozyme	Caprifoliaceae	Dipsacales	dicots	wide	outcrossing & asexual
Lonicera sempervirens L.	0.00735539	Allozyme	0.00946569	Allozyme	Caprifoliaceae	Dipsacales	dicots		outcrossing (animal)
Lotus genistoides Webb & Berthel.			0.00327746	Allozyme	Fabaceae	Fabales	dicots	narrow
Lotus holosericeus Webb & Berthel.	0.0040298	Allozyme			Fabaceae	Fabales	dicots	narrow
Lotus spartioides Webb	0.004	Allozyme			Fabaceae	Fabales	dicots	narrow
Luculia pinceana Hook.	0.00244444	SSR			Rubiaceae	Gentianales	dicots	wide	outcrossing (animal)
Luma apiculata (DC.) Burret	0.00267531	Allozyme	0.00421008	Allozyme	Myrtaceae	Myrtales	dicots	wide	mixed
Lupinus oreganus A. Heller	0.00138983	SSR			Fabaceae	Fabales	dicots	narrow	mixed
Luzula alpinopilosa (Chaix) Breistr.	0.000903226	AFLP	0.00148315	AFLP	Juncaceae	Poales	monocots		outcrossing (wind)
Lychnis flos-cuculi L.	0.00962791	SSR			Caryophyllaceae	Caryophyllales	dicots	wide	outcrossing (animal)
Lychnis viscaria L.	0.00124576	Allozyme			Caryophyllaceae	Caryophyllales	dicots	narrow	mixed
Lycopersicon chilense Dun			0.0201	Sequence	Solanaceae	Solanales	dicots		outcrossing
Lycopersicon chmielewskii C. M. Rick, Kesicki, Fobes & M. Holle			0.00027	Sequence	Solanaceae	Solanales	dicots		selfing
Lycopersicon hirsutum Dunal			0.0089	Sequence	Solanaceae	Solanales	dicots		outcrossing
Lycopersicon peruvianum Mill.			0.024	Sequence	Solanaceae	Solanales	dicots		outcrossing
Lycopersicon pimpinellifolium (L.) Mill.			0.0016	Sequence	Solanaceae	Solanales	dicots		selfing
Lycoris longituba Y. Xu & G. J. Fan	0.00260812	RAPD	0.00304344	RAPD	Amaryllidaceae	Asparagales	monocots	narrow
Lysimachia japonica Thunb.	0.00115213	AFLP	0.00163791	AFLP	Myrsinaceae	Ericales	dicots	wide
Lysimachia mauritiana Lam.	0.000560575	Allozyme			Myrsinaceae	Ericales	dicots	wide
Lysimachia tashiroi Makino	0.0021844	AFLP	0.00296073	AFLP	Myrsinaceae	Ericales	dicots	narrow
Macbridea alba Chapm.	0.00230744	Allozyme	0.00289078	Allozyme	Lamiaceae	Lamiales	dicots	narrow	outcrossing (animal)
Magnolia cathcartii (Hook. f. et Thomson) Nooteb.	0.00166743	AFLP	0.00231981	AFLP	Magnoliaceae	Magnoliales	dicots	narrow	mixed
Magnolia fraseri Walter	0.00262205	Allozyme	0.00339024	Allozyme	Magnoliaceae	Magnoliales	dicots	wide	outcrossing (animal)
Magnolia macrophylla Michx.	0.00122222	Allozyme	0.003	Allozyme	Magnoliaceae	Magnoliales	dicots	wide	outcrossing (animal)
Magnolia obovata Thunb.			0.0133846	SSR	Magnoliaceae	Magnoliales	dicots	wide	outcrossing (animal)
Magnolia officinalis Rehder & Wilson	0.00336973	ISSR	0.0072766	ISSR	Magnoliaceae	Magnoliales	dicots	narrow		NT
Magnolia sieboldii K. Koch ssp. japonica K. Ueda	0.0014904	SSR			Magnoliaceae	Magnoliales	dicots	narrow
Magnolia stellata (Siebold & Zucc.) Maxim.	0.00511744	SSR	0.0149492	SSR	Magnoliaceae	Magnoliales	dicots	narrow	mixed
Magnolia tripetala (L.) L.	0.000716649	Allozyme	0.00138806	Allozyme	Magnoliaceae	Magnoliales	dicots	wide	outcrossing (animal)
Malus sieversii (Ledeb.) M. Roem.			0.00596813	SSR	Rosaceae	Rosales	dicots	wide	outcrossing (animal)	VU
Manilkara huberi Ducke) A. Chev.			0.0118889	SSR	Sapotaceae	Ericales	dicots	wide	outcrossing (animal)
Meconopsis quintuplinervia Regel	0.00412329	RAPD	0.00520728	RAPD	Papaveraceae	Ranunculales	dicots	wide	outcrossing (wind)
Medicago citrina (Font Quer) Greuter	0.0010719	AFLP			Fabaceae	Fabales	dicots	narrow	mixed	CR
Medicago laciniata (L.) Miller	0.000941176	SSR			Fabaceae	Fabales	dicots	wide	selfing
Medicago lupulina L.	0.00065252	SSR			Fabaceae	Fabales	dicots	wide	selfing
Medicago ruthenica (L.) Trautv.	0.00419195	SSR			Fabaceae	Fabales	dicots	narrow	outcrossing (animal)
Medicago truncatula Gaertn.	0.00222248	RAPD	0.003409	Sequence	Fabaceae	Fabales	dicots	wide	selfing
Medusagyne oppositifolia Baker	0.00216667	SSR			Ochnaceae	Malpighiales	dicots	narrow	outcrossing (animal)	CR
Megacodon stylophorus (C. B. Clarke) H. Smith	0.00078665	ISSR	0.00338914	ISSR	Gentianaceae	Gentianales	dicots	narrow
Megaleranthis saniculifolia Ohwi	0.0025426	Allozyme	0.00373498	Allozyme	Ranunculaceae	Ranunculales	dicots	narrow
Melaleuca alternifolia (Maiden & Betche) Cheel			0.00713242	SSR	Myrtaceae	Myrtales	dicots	narrow	outcrossing (animal)
Melaleuca quinquenervia (Cav.) S. T. Blake	0.0116087	Allozyme	0.0304706	Allozyme	Myrtaceae	Myrtales	dicots	wide	mixed
Melica ciliata L.	0.000671595	AFLP			Poaceae	Poales	monocots	wide	selfing
Melica transsilvanica Schur	0.000486993	AFLP			Poaceae	Poales	monocots	wide	selfing
Melocactus curvispinus Pfeiff.	0.0022816	Allozyme	0.0035614	Allozyme	Cactaceae	Caryophyllales	dicots	wide	mixed	LC
Mentha pulegium L.	0.00623735	Allozyme			Lamiaceae	Lamiales	dicots	narrow	outcrossing (animal)
Menziesia ferruginea Sm. ssp. ferruginea	0.00195082	Allozyme	0.0029726	Allozyme	Ericaceae	Ericales	dicots	wide	outcrossing (animal)
Menziesia ferruginea Sm. ssp. glabella (A. Gray) Calder & Roy L. Taylor	0.00270203	Allozyme	0.00333372	Allozyme	Ericaceae	Ericales	dicots	wide	outcrossing (animal)
Menziesia pilosa (Michx. ex Lam.) Juss. ex Pers.	0.00150804	Allozyme	0.00185092	Allozyme	Ericaceae	Ericales	dicots	wide	outcrossing (animal)
Mercurialis annua L.	0.00281928	SSR			Euphorbiaceae	Malpighiales	dicots	narrow	mixed
Metasequoia glyptostroboides Hu & W. C. Cheng	0.00429643	RAPD	0.00705863	RAPD	Cupressaceae	Pinales	gymnosperm	narrow	outcrossing (wind)	EN
Metrodorea nigra A. St.-Hil.			0.00285437	SSR	Rutaceae	Sapindales	dicots	narrow	outcrossing
Metrosideros bartlettii J. W. Dawson			0.00263415	AFLP	Myrtaceae	Myrtales	dicots	narrow	outcrossing (animal)	EN
Metrosideros polymorpha Gaudich.	0.00417986	Allozyme	0.0049901	Allozyme	Myrtaceae	Myrtales	dicots	narrow	mixed
Metrosideros rugosa A. Gray	0.0186226	Allozyme			Myrtaceae	Myrtales	dicots	narrow
Metrosideros tremuloides (A. Heller) P. Knuth	0.00882955	Allozyme			Myrtaceae	Myrtales	dicots	narrow
Meum athamanticum Jacq.	0.00263415	AFLP			Apiaceae	Apiales	dicots	wide	outcrossing (animal)
Michelia coriacea Hung T. Chang	0.00177358	SSR	0.0020404	SSR	Magnoliaceae	Magnoliales	dicots	narrow		EN
Michelia formosana (Kaneh.) Masam. & Suzuki	0.00666798	Allozyme			Magnoliaceae	Magnoliales	dicots	narrow	outcrossing (animal)
Michelia maudiae Dunn	0.00279616	SSR	0.00468896	SSR	Magnoliaceae	Magnoliales	dicots	wide
Mikania micrantha Kunth	0.00241788	AFLP	0.00611594	AFLP	Magnoliaceae	Magnoliales	dicots	wide	selfing & asexual
Milicia excelsa (Welw.) C. C. Berg	0.00228266	SSR			Moraceae	Rosales	dicots	wide	outcrossing (wind)	NT
Mimetes fimbriifolius Salisb. ex Knight	0.00358442	AFLP			Proteaceae	Proteales	dicots	narrow	outcrossing (animal)
Mimetes hirtus Salisbury	0.00211765	AFLP			Proteaceae	Proteales	dicots	narrow	outcrossing (animal)	VU
Mimulus guttatus DC.	0.002	SSR	0.0116594	Allozyme	Phrymaceae	Lamiales	dicots	wide	mixed
Mimulus lacinaiatus A. Gray	0.000941176	SSR			Phrymaceae	Lamiales	dicots		selfing
Mimulus micranthus Heller	0.0014359	Allozyme	0.00225581	Allozyme	Phrymaceae	Lamiales	dicots	wide	selfing
Mimulus nasutus Greene			0.00192157	SSR	Phrymaceae	Lamiales	dicots		outcrossing
Mimulus platycalyx Pennell			0.00133333	SSR	Phrymaceae	Lamiales	dicots		selfing
Monimopetalum chinense Rehd.	0.00220118	AFLP	0.003625	AFLP	Celastraceae	Celastrales	dicots	narrow	mixed
Monotropa hypopitys L.	0.00339084	SSR			Ericaceae	Ericales	dicots	wide	sexual & asexual
Monstera adansonii Schott var. klotzschiana (Schott) Madison	0.00228401	AFLP			Araceae	Alismatales	monocots	wide	outcrossing
Moringa oleifera Lam.	0.000861736	AFLP			Moringaceae	Brassicales	dicots	wide	mixed
Mucuna pruriens (L.) DC.			0.00980702	RAPD	Fabaceae	Fabales	dicots	wide	selfing
Murraya koenigii (L.) Sprengel	0.00320324	ISSR	0.00470407	ISSR	Rutaceae	Sapindales	dicots	wide
Musa balbisiana Colla	0.00109981	SSR	0.00234499	SSR	Musaceae	Zingiberales	monocots	wide	outcrossing (animal)
Muscari tenuiflorum Tausch	0.0112086	Allozyme			Asparagaceae	Asparagales	monocots	wide	outcrossing (animal)
Myracrodruon urundeuva M. Allemão			0.00355556	SSR	Anacardiaceae	Sapindales	dicots	wide	outcrossing (animal) & outcrossing (wind)
Myrica adenophora Hance	0.00248993	Allozyme	0.00302746	Allozyme	Myricaceae	Fagales	dicots	narrow	outcrossing (wind)
Myrica cerifera L.	0.00904972	SSR	0.00336195	Allozyme	Myricaceae	Fagales	dicots	narrow	outcrossing (wind)
Myrica faya Ait.	0.00340541	SSR	0.0040241	SSR	Myricaceae	Fagales	dicots	wide	outcrossing (wind)	LC
Myrica rivas-martinezii A. Santos	0.00222833	SSR	0.00254545	SSR	Myricaceae	Fagales	dicots	narrow	outcrossing (wind)	CR
Myricaria laxiflora (Franch.) P. Y. Zhang et Y. J. Zhang	0.00857746	Allozyme	0.009	Allozyme	Tamaricaceae	Caryophyllales	dicots	narrow	outcrossing (animal) & outcrossing (wind)
Narcissus longispathus Pugsley	0.00278256	Allozyme	0.00339024	Allozyme	Amaryllidaceae	Asparagales	monocots	narrow	mixed	EN
Narcissus pseudonarcissus L.	0.00631649	RAPD			Amaryllidaceae	Asparagales	monocots	narrow	outcrossing (animal)
Narcissus triandrus L.	0.00265116	SSR	0.00326316	SSR	Amaryllidaceae	Asparagales	monocots	wide	outcrossing (animal)	LC
Neobalanocarpus heimii (King) P. Ashton			0.00688889	SSR	Dipterocarpaceae	Malvales	dicots	narrow	outcrossing (animal)	VU
Neolitsea sericea (Blume) Koidzumi	0.00339084	SSR	0.00506714	SSR	Lauraceae	Laurales	dicots	wide	outcrossing (animal)
Neopicrorhiza scrophulariiflora (Pennell) D. Y. Hong	0.00197626	ISSR	0.00962072	ISSR	Scrophulariaceae	Lamiales	dicots	narrow	outcrossing
Neostapfia colusana Burtt Davy	0.00489655	SSR			Poaceae	Poales	monocots	narrow	outcrossing (wind)
Neotinea maculata (Desf.) Stearn	0.00256311	AFLP			Orchidaceae	Asparagales	monocots	narrow	selfing
Nigella arvensis L.	0.00421854	RAPD			Ranunculaceae	Ranunculales	dicots	narrow	outcrossing
Nothapodytes nimmoniana (Graham) Mabb.	0.00250554	ISSR	0.0059005	ISSR	Ranunculaceae	Ranunculales	dicots
Nothofagus antarctica (Forster) Oerst.	0.00548172	Allozyme	0.00703738	Allozyme	Nothofagaceae	Fagales	dicots	wide	outcrossing
Nothofagus pumilio (Poepp. & Endl.) Krasser	0.00158065	Allozyme	0.00210231	Allozyme	Nothofagaceae	Fagales	dicots	wide	outcrossing
Nouelia insignis Franch.	0.00245317	ISSR	0.00405986	ISSR	Asteraceae	Asterales	dicots	narrow	outcrossing (animal)	NT
Nuphar lutea (L.) Sm.	0.00208163	SSR	0.00426959	SSR	Nymphaeaceae	Nymphaeales	dicots	wide	outcrossing (animal)
Nuttallanthus canadensis (L.) D. A. Sutton	0.00172727	Allozyme	0.00330556	Allozyme	Plantaginaceae	Lamiales	dicots	wide	selfing
Nuttallanthus floridanus (Chapm.) D. A. Sutton	0.000943574	Allozyme	0.00313793	Allozyme	Plantaginaceae	Lamiales	dicots	wide	selfing
Nuttallanthus texanus (Scheele) D. A. Sutton	0.00165372	Allozyme	0.00670449	Allozyme	Plantaginaceae	Lamiales	dicots	wide	selfing
Nymphoides coreana (Levl.) Hara	0.000428571	Allozyme	0.00816667	Allozyme	Menyanthaceae	Asterales	dicots	narrow	selfing
Nymphoides peltata (S. G. Gmel.) Kuntze	0.00111042	SSR	0.00209836	SSR	Menyanthaceae	Asterales	dicots	wide	sexual & asexual
Ocotea catharinensis Mez.	0.0127621	Allozyme	0.0156492	Allozyme	Lauraceae	Laurales	dicots	narrow	outcrossing (animal)	VU
Oenocarpus bataua Mart.			0.00388235	SSR	Arecaceae	Arecales	monocots	wide	outcrossing (animal)
Olearia gardneri Heads	0.0017931	AFLP	0.00245783	AFLP	Asteraceae	Asterales	dicots	narrow	outcrossing
Oncidium hookeri Rolfe	0.00230744	Allozyme			Orchidaceae	Asparagales	monocots	narrow	sexual & asexual
Ophiopogon intermedius D. Don	0.0114074	Allozyme	0.0155854	Allozyme	Asparagaceae	Asparagales	monocots	wide
Oplopanax elatus (Nakai) Nakai			0.00267531	Allozyme	Araliaceae	Apiales	dicots	narrow	sexual & asexual
Opuntia echios J. T. Howell	0.00514031	SSR			Cactaceae	Caryophyllales	dicots	narrow
Orchis purpurea Hudson	0.00318987	AFLP	0.00358442	AFLP	Orchidaceae	Asparagales	monocots	wide	outcrossing (animal)
Oreorchis patens (Lindl.) Lindl.	0.00652294	Allozyme	0.00730189	Allozyme	Orchidaceae	Asparagales	monocots	wide	mixed
Origanum vulgare L.	0.00443836	AFLP			Lamiaceae	Lamiales	dicots	wide	outcrossing (animal)
Orobanche cumana Wallr.	0.00106926	RAPD	0.00285366	RAPD	Orobanchaceae	Lamiales	dicots	wide	selfing
Orthilia secunda (L.) House	0.00419195	SSR			Ericaceae	Ericales	dicots	wide
Orychophragmus violaceus (L.) O. E. Schulz	0.00741983	ISSR	0.010314	ISSR	Brassicaceae	Brassicales	dicots	wide	outcrossing
Oryza australiensis Domin			0.0044	Sequence	Poaceae	Poales	monocots	narrow
Oryza barthii A. Chev.			0.0021	Sequence	Poaceae	Poales	monocots	wide	selfing
Oryza brachyantha A. Chev. et Roehr.			0.0033	Sequence	Poaceae	Poales	monocots	wide
Oryza eichingeri A. Peter			0.0073	Sequence	Poaceae	Poales	monocots	wide	selfing
Oryza glumaepatula Steud.	0.000254791	SSR	0.0123333	Allozyme	Poaceae	Poales	monocots	narrow
Oryza granulata Nees et Arn. ex Watt	0.000341463	Allozyme	0.0032	Sequence	Poaceae	Poales	monocots	wide	selfing
Oryza latifolia Desv.	0.00937755	Allozyme			Poaceae	Poales	monocots	wide
Oryza nivara Sharma et Shastry			0.0054	Sequence	Poaceae	Poales	monocots	wide	selfing
Oryza officinalis Wall ex Watt	0.000627188	Allozyme	0.005	Sequence	Poaceae	Poales	monocots	wide	outcrossing	LC
Oryza punctata Kotschy ex Steud.			0.0011	Sequence	Poaceae	Poales	monocots	wide
Oryza rhizomatis Vaughan			0.0063	Sequence	Poaceae	Poales	monocots	narrow	outcrossing
Oryza rufipogon Griff.	0.00140716	SSR	0.00519	Sequence	Poaceae	Poales	monocots	wide	outcrossing	LC
Ottelia alismoides (L.) Pers.	0.000613779	ISSR	0.00157286	ISSR	Hydrocharitaceae	Alismatales	monocots	wide	selfing	LC
Oxalis pes-caprae L.	0.00378947	AFLP			Oxalidaceae	Oxalidales	dicots	wide	asexual
Oxytropis campestris (L.) DC. var. chartacea (Fassett) Barneby	0.0017931	AFLP			Fabaceae	Fabales	dicots	narrow	outcrossing
Paeonia rockii (S. G. Haw & Lauener) T. Hong & J. J. Li	0.00193701	SSR	0.00596813	SSR	Paeoniaceae	Saxifragales	dicots	wide	outcrossing
Palicourea coriacea (Cham.) K. Schum.	0.00546591	RAPD			Rubiaceae	Gentianales	dicots	narrow
Pancratium maritimum L.			0.00233333	Allozyme	Amaryllidaceae	Asparagales	monocots	narrow
Papaver alpinum L.	0.00131853	AFLP			Papaveraceae	Ranunculales	dicots	wide
Parashorea tomentella (Symington) Meijer			0.00310204	SSR	Dipterocarpaceae	Malvales	dicots	narrow
Paris polyphylla Smith var. yunnanensis (Franch.) Hand.-Mazz.	0.00250943	ISSR			Melanthiaceae	Liliales	monocots
Paris quadrifolia L.	0.0012246	AFLP			Melanthiaceae	Liliales	monocots	wide	selfing & asexual
Parnassia palustris L.	0.00492593	Allozyme			Celastraceae	Celastrales	dicots	narrow
Pedicularis dasyantha (Trautv.) Hadac	8.43373e-05	Allozyme	0.000341463	Allozyme	Orobanchaceae	Lamiales	dicots	narrow	selfing
Pennisetum glaucum (L.) R. Br. (wild)			0.00741	Sequence	Poaceae	Poales	monocots	wide
Penstemon deustus Dougl. ex Lindl.	0.00673362	SSR			Plantaginaceae	Lamiales	dicots	wide	outcrossing (animal)
Penstemon pachyphyllus A. Gray ex Rydb.	0.00326316	SSR			Plantaginaceae	Lamiales	dicots	wide	outcrossing (animal)
Penstemon rostriflorus Kellogg	0.00869519	SSR			Plantaginaceae	Lamiales	dicots	wide	outcrossing (animal)
Pereskia guamacho F. A. C. Weber	0.00531579	Allozyme	0.00659527	Allozyme	Cactaceae	Caryophyllales	dicots	wide	outcrossing (animal)	LC
Persoonia glaucescens Sieber ex Spreng.	0.00208451	AFLP	0.0102	Sequence	Proteaceae	Proteales	dicots	narrow	outcrossing (animal)
Persoonia lanceolata Andrews	0.00176147	AFLP	0.00187283	AFLP	Proteaceae	Proteales	dicots	narrow	outcrossing (animal)
Persoonia mollis R. Br.	0.00256902	Allozyme	0.00339024	Allozyme	Proteaceae	Proteales	dicots	narrow	outcrossing (animal)
Petasites frigidus (L.) Fr.	0.00432256	Allozyme	0.00915075	Allozyme	Asteraceae	Asterales	dicots		sexual & asexual
Petasites palmatus (Aiton) A. Gray	0.00272077	Allozyme	0.0112234	Allozyme	Asteraceae	Asterales	dicots		sexual & asexual
Petasites sagittatus (Banks ex Pursh) A. Gray	0.00219673	Allozyme	0.00980534	Allozyme	Asteraceae	Asterales	dicots		sexual & asexual
Petasites vitifolius Greene	0.00332526	Allozyme	0.00712374	Allozyme	Asteraceae	Asterales	dicots		sexual & asexual
Petrocoptis montsicciana O. Bolòs & Rivas Mart.	0.00659527	Allozyme	0.0130909	Allozyme	Caryophyllaceae	Caryophyllales	dicots	narrow	outcrossing (animal)	NT
Petrocoptis pardoi Pau	0.0049901	Allozyme	0.00891453	Allozyme	Caryophyllaceae	Caryophyllales	dicots	narrow
Peucedanum ostruthium (L.) Koch	0.00245783	AFLP			Apiaceae	Apiales	dicots		outcrossing (animal)
Phacelia dubia (L.) Trel.	0.00110526	Allozyme			Boraginaceae	Lamiales	dicots		mixed
Phaedranassa tunguraguae Ravenna	0.00569231	SSR			Amaryllidaceae	Asparagales	monocots	narrow	sexual & asexual	EN
Phellodendron amurense Rupr.	0.00195349	AFLP	0.00360874	AFLP	Rutaceae	Sapindales	dicots	narrow
Phlomis composita Pau			0.0018013	Allozyme	Lamiaceae	Lamiales	dicots
Phlomis crinita Cav. ssp. crinita	0.00117529	Allozyme	0.00202632	Allozyme	Lamiaceae	Lamiales	dicots	narrow	mixed
Phlomis crinita Cav. ssp. malacitana (Pau) Cabezudo, Nieto Caldera & T. Navarro	0.00112856	Allozyme	0.00158065	Allozyme	Lamiaceae	Lamiales	dicots	narrow	mixed
Phlomis lychnitis L.	0.00205159	Allozyme	0.00230744	Allozyme	Lamiaceae	Lamiales	dicots	narrow	mixed
Phlomis purpurea L.			0.0019458	Allozyme	Lamiaceae	Lamiales	dicots
Phoenix canariensis Chabaud	0.00394062	Allozyme	0.00521723	Allozyme	Arecaceae	Arecales	monocots	narrow
Phragmites australis (Cav.) Trin. ex Steud.	0.021	Allozyme	0.0267273	Allozyme	Poaceae	Poales	monocots	wide	sexual & asexual	LC
Phyteuma betonicifolium Vill.	0.00133333	AFLP	0.00263415	AFLP	Campanulaceae	Asterales	dicots		outcrossing (animal)
Phyteuma hemisphaericum L.	0.00133333	AFLP	0.00245783	AFLP	Campanulaceae	Asterales	dicots		outcrossing (animal)
Picea abies (L.) H. Karst.	0.00747867	SSR	0.00709	Sequence	Pinaceae	Pinales	gymnosperm	wide	outcrossing (wind)	LC
Picea asperata Mast.	0.00426428	RAPD	0.00606158	RAPD	Pinaceae	Pinales	gymnosperm	narrow	outcrossing (wind)	VU
Picea breweriana S. Watson	0.00311022	Allozyme	0.00204444	Sequence	Pinaceae	Pinales	gymnosperm	narrow	outcrossing (wind)	VU
Picea glauca (Moench) Voss	0.00560456	SSR	0.00863333	Sequence	Pinaceae	Pinales	gymnosperm	wide	outcrossing (wind)	LC
Picea mariana (Mill.) Britton, Sterns & Poggenburg	0.009	Allozyme	0.00422222	Sequence	Pinaceae	Pinales	gymnosperm	wide	outcrossing (wind)	LC
Picea rubens Sarg.	0.00179883	Allozyme			Pinaceae	Pinales	gymnosperm	wide	outcrossing (wind)	LC
Pilgerodendron uviferum (D. Don) Florin	0.000716649	Allozyme	0.000761658	Allozyme	Cupressaceae	Pinales	gymnosperm	narrow	outcrossing (wind)	VU
Pilosella alpicola ssp. ullepitschii (Błocki) Soják	0.00476687	Allozyme	0.0072638	Allozyme	Asteraceae	Asterales	dicots	narrow	outcrossing
Pilosocereus lanuginosus (L.) Byles & G. D. Rowley	0.00711245	Allozyme	0.00792562	Allozyme	Cactaceae	Caryophyllales	dicots		outcrossing (animal)	LC
Pinguicula moranensis Kunt	0.00615144	RAPD	0.00768746	RAPD	Lentibulariaceae	Lamiales	dicots	wide
Pinus albicaulis Engelm.	0.00223009	Allozyme	0.0023853	Allozyme	Pinaceae	Pinales	gymnosperm	narrow	outcrossing (wind)	EN
Pinus attenuata Lemmon	0.00259551	Allozyme	0.00313793	Allozyme	Pinaceae	Pinales	gymnosperm	wide	outcrossing (wind)	LC
Pinus banksiana Lamb.	0.00264865	Allozyme	0.00272881	Allozyme	Pinaceae	Pinales	gymnosperm	wide	outcrossing (wind)	LC
Pinus caribaea Morelet			0.0849565	SSR	Pinaceae	Pinales	gymnosperm	wide	outcrossing (wind)	LC
Pinus cembra L.	0.00210231	Allozyme	0.0013	Sequence	Pinaceae	Pinales	gymnosperm	wide	outcrossing (wind)	LC
Pinus contorta Douglas	0.00499301	SSR	0.00476687	Allozyme	Pinaceae	Pinales	gymnosperm	wide	outcrossing (wind)	LC
Pinus coulteri D. Don	0.00364789	Allozyme			Pinaceae	Pinales	gymnosperm	narrow	outcrossing (wind)	NT
Pinus cubensis Grisebach			0.00606452	SSR	Pinaceae	Pinales	gymnosperm	narrow	outcrossing (wind)	LC
Pinus densata Mast.	0.00634375	Allozyme	0.0122	Sequence	Pinaceae	Pinales	gymnosperm	wide	outcrossing (wind)	LC
Pinus flexilis E. James	0.009	Allozyme			Pinaceae	Pinales	gymnosperm	wide	outcrossing (wind)	LC
Pinus henryi Mast.			0.0150794	SSR	Pinaceae	Pinales	gymnosperm	narrow	outcrossing (wind)	NT
Pinus jeffreyi Balf.			0.00741678	Allozyme	Pinaceae	Pinales	gymnosperm	wide	outcrossing (wind)	LC
Pinus kesiya Royle ex Gordon	0.00379339	Allozyme			Pinaceae	Pinales	gymnosperm	wide	outcrossing (wind)	LC
Pinus lambertiana Douglas			0.00796552	Allozyme	Pinaceae	Pinales	gymnosperm	wide	outcrossing (wind)	LC
Pinus longaeva D. K. Bailey	0.00324942	Allozyme	0.00327746	Allozyme	Pinaceae	Pinales	gymnosperm	wide	outcrossing (wind)	LC
Pinus maestrensis Bisse			0.016018	SSR	Pinaceae	Pinales	gymnosperm	narrow	outcrossing (wind)
Pinus monticola Douglas ex D. Don	0.00168301	AFLP	0.00176147	AFLP	Pinaceae	Pinales	gymnosperm	narrow	outcrossing (wind)	NT
Pinus mugo Turra	0.00703738	Allozyme	0.0067	Sequence	Pinaceae	Pinales	gymnosperm	wide	outcrossing (wind)	LC
Pinus muricata D. Don	0.00259551	Allozyme	0.00370588	Allozyme	Pinaceae	Pinales	gymnosperm	narrow	outcrossing (wind)	VU
Pinus occidentalis Sw.			0.013873	SSR	Pinaceae	Pinales	gymnosperm	narrow	outcrossing (wind)	EN
Pinus oocarpa Schiede ex Schltdl.	0.00724922	RAPD	0.00877554	RAPD	Pinaceae	Pinales	gymnosperm	wide	outcrossing (wind)	LC
Pinus pinaster Aiton	0.0055188	SSR	0.00241	Sequence	Pinaceae	Pinales	gymnosperm	wide	outcrossing (wind)	LC
Pinus radiata D. Don	0.00540741	SSR	0.00186	Sequence	Pinaceae	Pinales	gymnosperm	narrow	outcrossing (wind)	EN
Pinus squamata X. W. Li			0.000251784	RAPD	Pinaceae	Pinales	gymnosperm	narrow	outcrossing (wind)	CR
Pinus strobus L.	0.00308906	SSR	0.0123333	Allozyme	Pinaceae	Pinales	gymnosperm	wide	outcrossing (wind)	LC
Pinus sylvestris L.	0.00616688	Allozyme	0.0117	Sequence	Pinaceae	Pinales	gymnosperm	wide	outcrossing (wind)	LC
Pinus tabuliformis Carr.	0.00541509	Allozyme	0.0119	Sequence	Pinaceae	Pinales	gymnosperm	wide	outcrossing (wind)	LC
Pinus taeda L.			0.0064	Sequence	Pinaceae	Pinales	gymnosperm	wide	outcrossing (wind)	LC
Pinus yunnanensis Franch.	0.00492593	Allozyme	0.0095	Sequence	Pinaceae	Pinales	gymnosperm	wide	outcrossing (wind)	LC
Piper cernuum Vell.	0.00305498	Allozyme	0.00483026	Allozyme	Piperaceae	Piperales	dicots	narrow
Piperia yadonii R. Morgan & Ackerman	0.00087779	ISSR			Orchidaceae	Asparagales	monocots	narrow	outcrossing (animal)
Pistacia lentiscus L.	0.00388312	RAPD	0.00384795	SSR	Anacardiaceae	Sapindales	dicots	wide	outcrossing (wind)
Pitcairnia geyskesii L. B. Sm.	0.000962963	SSR			Bromeliaceae	Poales	monocots	narrow	sexual & asexual
Plantago brutia Ten.	0.00266667	ISSR	0.00328395	ISSR	Plantaginaceae	Lamiales	dicots	narrow	outcrossing
Plantago lanceolata L.	0.00336492	AFLP			Plantaginaceae	Lamiales	dicots	wide	outcrossing (wind)
Platanthera bifolia (L.) L. C. Rich.	0.00187582	Allozyme	0.00215325	Allozyme	Orchidaceae	Asparagales	monocots	wide	outcrossing (animal) & asexual
Platypodium elegans Vogel			0.00841667	SSR	Fabaceae	Fabales	dicots	narrow	outcrossing (animal)	LC
Poa annua L.	0.00364537	AFLP			Poaceae	Poales	monocots	wide	selfing
Podophyllum hexandrum Royle	0.00144444	RAPD	0.00669697	RAPD	Berberidaceae	Ranunculales	dicots	narrow	outcrossing
Polygonum capitatum (Buch.-Ham. ex D. Don) H. Gross	0.00456272	ISSR			Polygonaceae	Caryophyllales	dicots	wide
Pongamia pinnata (L.) Pierre	0.000319672	RAPD	0.000513514	RAPD	Fabaceae	Fabales	dicots	wide	outcrossing	LC
Populus alba L.	0.00126264	SSR	0.00195082	Allozyme	Salicaceae	Malpighiales	dicots	wide	outcrossing (wind)
Populus balsamifera L.			0.0019	Sequence	Salicaceae	Malpighiales	dicots	wide
Populus euphratica Oliv.	0.0105	SSR			Salicaceae	Malpighiales	dicots	wide
Populus nigra L.	0.00514286	SSR			Salicaceae	Malpighiales	dicots	wide	outcrossing (wind)	LC
Populus pruinosa Schrenk	0.006	SSR			Salicaceae	Malpighiales	dicots			NT
Populus tremula L.	0.002329	SSR	0.0042	Sequence	Salicaceae	Malpighiales	dicots	wide	outcrossing (wind)
Populus tremuloides Michx.	0.00366667	RAPD			Salicaceae	Malpighiales	dicots	wide	outcrossing (wind)
Populus trichocarpa Torr. & A. Gray			0.0029	Sequence	Salicaceae	Malpighiales	dicots	wide
Posidonia australis Hook. f.	0.000852237	Allozyme			Posidoniaceae	Alismatales	monocots	narrow	sexual & asexual	NT
Posidonia oceanica (L.) Delile	0.000758621	SSR			Posidoniaceae	Alismatales	monocots	narrow	sexual & asexual	LC
Potamogeton malaianus Miq.	0.00414412	ISSR	0.00459477	ISSR	Potamogetonaceae	Alismatales	monocots	wide	sexual & asexual	LC
Potamogeton pectinatus (L.) Böerner	0.00189864	SSR			Potamogetonaceae	Alismatales	monocots	wide	sexual & asexual	LC
Potentilla matsumurae Th. Wolf.	0.00230744	Allozyme			Rosaceae	Rosales	dicots	narrow	outcrossing (animal)
Primula apennina Widmer	0.00358794	ISSR	0.00446966	ISSR	Primulaceae	Ericales	dicots	narrow	outcrossing (animal)	VU
Primula cuneifolia Ledeb.			0.00405967	Allozyme	Primulaceae	Ericales	dicots		outcrossing (animal)
Primula elatior Hill	0.00155639	Allozyme	0.00497793	AFLP	Primulaceae	Ericales	dicots	wide	outcrossing (animal)
Primula kisoana Miq. var. kisoana			0.00810101	SSR	Primulaceae	Ericales	dicots	narrow	outcrossing (animal) & asexual
Primula minima L.			0.00338462	AFLP	Primulaceae	Ericales	dicots		sexual & asexual
Primula nutans Georgi	0.000325581	SSR	0.000967359	SSR	Primulaceae	Ericales	dicots	wide	outcrossing (animal) & asexual
Primula obconica Hance	0.00292866	ISSR			Primulaceae	Ericales	dicots	wide
Primula sieboldii E. Morren	0.00489655	SSR			Primulaceae	Ericales	dicots	narrow	outcrossing (animal) & asexual
Primula sikkimensis Hook.	0.00512568	ISSR	0.00945845	ISSR	Primulaceae	Ericales	dicots	wide	outcrossing (animal)
Primula veris L.	0.00241137	Allozyme	0.00289078	Allozyme	Primulaceae	Ericales	dicots	wide	outcrossing (animal)
Primula vulgaris Huds.	0.00268384	SSR	0.00172727	Allozyme	Primulaceae	Ericales	dicots	narrow	outcrossing (animal)
Primulina tabacum Hance	0.00338462	AFLP	0.00615431	AFLP	Gesneriaceae	Lamiales	dicots	narrow	outcrossing (animal)
Prunus africana (Hook. f.) Kalkman	0.00391716	SSR			Rosaceae	Rosales	dicots	wide	outcrossing (animal)	VU
Psammochloa villosa (Trin.) Bor	0.000852237	Allozyme	0.0024375	Allozyme	Poaceae	Poales	monocots	wide	selfing & asexual
Psathyrostachys juncea (Fisch.) Nevski	0.0228413	Allozyme	0.0264041	Allozyme	Poaceae	Poales	monocots	wide	outcrossing
Pseudopanax ferox Kirk			0.00393472	SSR	Araliaceae	Apiales	dicots	narrow	outcrossing (animal)	NT
Pseudotsuga menziesii (Mirb.) Franco	0.00370588	Allozyme	0.00756	Sequence	Pinaceae	Pinales	gymnosperm	wide	outcrossing (wind)	LC
Psychotria ipecacuanha (Brot.) L. Andersson	0.00189103	ISSR	0.00770543	ISSR	Rubiaceae	Gentianales	dicots	narrow
Psychotria officinalis (Aubl.) Raeusch. ex Sandwith	0.00473529	Allozyme			Rubiaceae	Gentianales	dicots	narrow	outcrossing (animal)
Psychotria tenuinervis Muell. Arg.	0.000985075	SSR			Rubiaceae	Gentianales	dicots		outcrossing (animal)
Pterocarpus officinalis Jacq.	0.00138983	SSR	0.00265116	SSR	Fabaceae	Fabales	dicots	wide	outcrossing (animal)
Pteroceltis tatarinowii Maxim.	0.00569612	ISSR	0.00783747	ISSR	Ulmaceae	Rosales	dicots	narrow	sexual & asexual
Pterostylis aff. alata	0.0018013	Allozyme	0.00235929	Allozyme	Orchidaceae	Asparagales	monocots	narrow
Pterostylis angusta A. S. George	0.00202632	Allozyme	0.00217881	Allozyme	Orchidaceae	Asparagales	monocots	narrow
Pterostylis aspera D. L. Jones & M. A. Clem.	0.00397027	Allozyme	0.00460976	Allozyme	Orchidaceae	Asparagales	monocots	narrow
Pterostylis hamiltonii Nicholls	0.00417986	Allozyme	0.0051194	Allozyme	Orchidaceae	Asparagales	monocots	narrow
Pterostylis rogersii E. Coleman	0.0029726	Allozyme	0.00385207	Allozyme	Orchidaceae	Asparagales	monocots	narrow
Pterostylis scabra Lindl.	0.00528285	Allozyme	0.00718792	Allozyme	Orchidaceae	Asparagales	monocots	narrow
Puccinellia lemmonii (Vasey) Scribn.	0.00289078	Allozyme			Poaceae	Poales	monocots
Puccinellia pungens (Pau) Paunero	0.000943574	Allozyme	0.000989529	Allozyme	Poaceae	Poales	monocots	narrow	outcrossing (wind)	VU
Pueraria lobata (Willd.) Ohwi	0.00538191	Allozyme	0.00874504	Allozyme	Fabaceae	Fabales	dicots		sexual & asexual
Pulmonaria officinalis L.	0.003	SSR			Boraginaceae	Lamiales	dicots	wide	outcrossing (animal) & asexual
Puya raimondii Harms	0.000138378	AFLP	0.00502369	AFLP	Bromeliaceae	Poales	monocots	narrow		EN
Quercus agrifolia Née			0.003	AFLP	Fagaceae	Fagales	dicots	narrow	outcrossing (wind)
Quercus coccifera L.			0.0038227	Allozyme	Fagaceae	Fagales	dicots	wide	outcrossing (wind)
Quercus crispula Blume	0.00529927	SSR			Fagaceae	Fagales	dicots	wide	outcrossing (wind)
Quercus geminata Small			0.000898551	SSR	Fagaceae	Fagales	dicots	narrow	outcrossing (wind)
Quercus hypoleucoides A. Camus	0.00616327	SSR			Fagaceae	Fagales	dicots	narrow	outcrossing (wind)
Quercus ilex L.	0.00445161	SSR			Fagaceae	Fagales	dicots	wide	outcrossing (wind)
Quercus kelloggi Newb.			0.003	AFLP	Fagaceae	Fagales	dicots	narrow	outcrossing (wind)
Quercus laevis Walter	0.00749389	Allozyme	0.00753261	Allozyme	Fagaceae	Fagales	dicots	narrow	outcrossing (wind)
Quercus liaotungensis Koidz.	0.00640336	SSR			Fagaceae	Fagales	dicots	wide	outcrossing (wind)
Quercus lobata Née			0.00569231	SSR	Fagaceae	Fagales	dicots	narrow	outcrossing (wind)
Quercus mongolica Fisch. ex Turcz.	0.00587402	SSR			Fagaceae	Fagales	dicots	wide	outcrossing (wind)
Quercus parvula Greene			0.00318987	AFLP	Fagaceae	Fagales	dicots	narrow	outcrossing (wind)
Quercus petraea (Mattuschka) Liebl.	0.00923596	SSR	0.00722	Sequence	Fagaceae	Fagales	dicots	wide	outcrossing (wind)
Quercus robur L.	0.00385207	Allozyme	0.0133846	SSR	Fagaceae	Fagales	dicots	wide	outcrossing (wind)
Quercus rubra L.			0.0154583	Allozyme	Fagaceae	Fagales	dicots	wide	outcrossing (wind)
Quercus scytophylla Liebm.	0.008	SSR			Fagaceae	Fagales	dicots	narrow	outcrossing (wind)
Quercus semiserrata Roxb.	0.00425	SSR	0.00669565	SSR	Fagaceae	Fagales	dicots	wide	outcrossing (wind)
Quercus serrata Thunb.	0.00805025	SSR			Fagaceae	Fagales	dicots	narrow	outcrossing (wind)
Quercus sideroxyla Humb. & Bonpl.	0.00942857	SSR			Fagaceae	Fagales	dicots	narrow	outcrossing (wind)
Quercus variabilis Bl.	0.00693655	SSR	0.00830397	SSR	Fagaceae	Fagales	dicots	wide	outcrossing (wind)
Quercus wislizeni A. DC.			0.00318987	AFLP	Fagaceae	Fagales	dicots	narrow	outcrossing (wind)
Ramonda myconi (L.) Rchb.	0.00304938	RAPD	0.00453676	RAPD	Gesneriaceae	Lamiales	dicots	narrow	outcrossing (animal)
Ranunculus acris L.	0.00524138	AFLP			Ranunculaceae	Ranunculales	dicots	wide	outcrossing (animal)
Ranunculus alpestris L.	0.000903226	AFLP	0.0017931	AFLP	Ranunculaceae	Ranunculales	dicots		outcrossing (animal)
Ranunculus bulbosus L.	0.00244043	AFLP			Ranunculaceae	Ranunculales	dicots		outcrossing (animal)
Ranunculus cabrerensis Rothm.			0.00583003	ISSR	Ranunculaceae	Ranunculales	dicots	narrow
Raphanus sativus L. var. hortensis Backer	0.00243459	SSR	0.00283313	AFLP	Brassicaceae	Brassicales	dicots	narrow	outcrossing (animal)
Rauvolfia serpentina (L.) Benth. ex Kurz			0.00394872	ISSR	Apocynaceae	Gentianales	dicots	wide	mixed
Rhamnus persicifolia Moris	0.00173918	ISSR	0.00364558	ISSR	Rhamnaceae	Rosales	dicots	narrow	outcrossing (animal) & outcrossing (wind)
Rheum officinale L.	0.0015694	ISSR	0.00702418	ISSR	Polygonaceae	Caryophyllales	dicots	narrow	outcrossing
Rheum palmatum L.	0.00235132	ISSR	0.00631046	ISSR	Polygonaceae	Caryophyllales	dicots	narrow	outcrossing (animal)
Rheum tanguticum Maxim. ex Regel	0.00212371	SSR	0.00514923	ISSR	Polygonaceae	Caryophyllales	dicots	narrow	outcrossing (animal)
Rhinanthus angustifolius C. C. Gmel.	0.000875536	AFLP			Orobanchaceae	Lamiales	dicots	wide	outcrossing (animal)
Rhodiola dumulosa (Franch.) S. H. Fu	0.00211765	AFLP	0.00394261	AFLP	Crassulaceae	Saxifragales	dicots	wide	mixed
Rhodiola rosea L.	0.00332567	AFLP	0.00620941	AFLP	Crassulaceae	Saxifragales	dicots	wide
Rhododendron brachycarpum Franch.	0.0017027	Allozyme			Ericaceae	Ericales	dicots	narrow
Rhododendron ferrugineum L.	0.00148315	AFLP	0.00318987	AFLP	Ericaceae	Ericales	dicots		outcrossing (animal)
Rhododendron mefternichii Siebold et Zucc. var. hondoense Naka	0.00504225	SSR	0.00626446	SSR	Ericaceae	Ericales	dicots	narrow	outcrossing (animal)
Rhododendron ponticum L.	0.00151351	AFLP			Ericaceae	Ericales	dicots	wide	outcrossing (animal)
Rhododendron ripense Makino			0.008	SSR	Ericaceae	Ericales	dicots	narrow	outcrossing (animal)
Rhododendron simsii Planch.	0.0025808	AFLP	0.00305646	AFLP	Ericaceae	Ericales	dicots	wide	outcrossing (animal)
Rhus copallina L.	0.00370588	Allozyme	0.00857746	Allozyme	Anacardiaceae	Sapindales	dicots	narrow
Rhus glabra L.	0.00370588	Allozyme	0.00627273	Allozyme	Anacardiaceae	Sapindales	dicots	wide
Rhus michauxii Sarg.			0.00182609	Allozyme	Anacardiaceae	Sapindales	dicots	narrow
Ricotia lunaria (L.) DC.	0.00378947	AFLP	0.00646154	AFLP	Brassicaceae	Brassicales	dicots	narrow	mixed
Rorippa amphibia (L.) Besser	0.000531646	SSR			Brassicaceae	Brassicales	dicots	wide
Rosa persica J. F. Gmel.	0.00226873	AFLP	0.0070779	AFLP	Rosaceae	Rosales	dicots	wide	outcrossing
Rosmarinus officinalis L.	0.00768852	Allozyme			Lamiaceae	Lamiales	dicots	wide	outcrossing
Rumex rothschildianus Aarons. ex Evenari	0.00245783	AFLP			Polygonaceae	Caryophyllales	dicots	narrow	outcrossing (wind)
Rutidosis leptorrhynchoides F. Muell.	0.00558228	Allozyme	0.00627273	Allozyme	Asteraceae	Asterales	dicots	narrow	outcrossing (animal)
Ryparosa kurrangii B. L. Webber	0.00201869	AFLP	0.00205152	AFLP	Achariaceae	Malpighiales	dicots	narrow	outcrossing (animal)
Sagittaria latifolia Willd.	0.00558228	Allozyme			Alismataceae	Alismatales	monocots	wide	sexual & asexual
Sagittaria lichuanensis J. K. Chen, X. Z. Sun et H. Q. Wang	0.000127144	ISSR	0.000358974	ISSR	Alismataceae	Alismatales	monocots	narrow	sexual & asexual	EN
Sagittaria natans Pall.	0.0010303	SSR	0.00178072	SSR	Alismataceae	Alismatales	monocots	narrow	sexual & asexual
Sagittaria trifolia L.	0.00059854	ISSR	0.00125054	ISSR	Alismataceae	Alismatales	monocots	wide	sexual & asexual	LC
Saintpaulia ionantha ssp. grotei (Engler) I. Darbysh.	0.00658824	ISSR			Gesneriaceae	Lamiales	dicots	narrow	mixed
Salix hukaoana Kimura	0.00174532	SSR			Salicaceae	Malpighiales	dicots	narrow
Salix schwerinii E. Wolf			0.00849	Sequence	Salicaceae	Malpighiales	dicots	narrow	sexual & asexual
Salix viminalis L.	0.00255581	SSR	0.00655	Sequence	Salicaceae	Malpighiales	dicots	wide	sexual & asexual
Salvia miltiorrhiza Bunge	0.00264883	ISSR	0.00424256	AFLP	Lamiaceae	Lamiales	dicots	wide	outcrossing (animal)
Sambucus palmensis Link	0.0017037	SSR	0.002	SSR	Adoxaceae	Dipsacales	dicots	narrow	sexual & asexual
Santalum austrocaledonicum Vieill.	0.00150877	SSR	0.00388235	SSR	Santalaceae	Santalales	dicots	narrow
Saponaria bellidifolia Sm.	0.000933548	RAPD	0.00199423	RAPD	Caryophyllaceae	Caryophyllales	dicots	wide	outcrossing (animal)
Sarcanthus scolopendrifolius Makino	4.20842e-05	Allozyme	0.000319797	Allozyme	Orchidaceae	Asparagales	monocots	narrow
Sarracenia jonesii Wherry	0.00136422	Allozyme	0.00197593	Allozyme	Sarraceniaceae	Ericales	dicots	narrow	sexual & asexual
Sarracenia leucophylla Raf.	0.00470379	Allozyme	0.00606186	Allozyme	Sarraceniaceae	Ericales	dicots	narrow	outcrossing (animal)	VU
Sarracenia oreophila (Kearney) Wherry	0.00134043	Allozyme	0.00187582	Allozyme	Sarraceniaceae	Ericales	dicots	narrow	sexual & asexual	CR
Sarracenia rubra Walt. ssp. alabamensis (Case & Case) Schnell	0.00483026	Allozyme	0.00554867	Allozyme	Sarraceniaceae	Ericales	dicots	narrow	outcrossing (animal)
Sarracenia rubra Walter ssp. rubra	0.00347552	Allozyme	0.0045164	Allozyme	Sarraceniaceae	Ericales	dicots	narrow	outcrossing (animal)
Saruma henryi Oliv.	0.00159777	SSR	0.032904	SSR	Aristolochiaceae	Piperales	dicots	narrow	selfing	EN
Saussurea chabyoungsanica Im	0.00292866	ISSR	0.00760494	ISSR	Asteraceae	Asterales	dicots	narrow
Saxifraga callosa Sm.	0.000765957	AFLP			Saxifragaceae	Saxifragales	dicots	narrow
Saxifraga florulenta Moretti	0.000889366	AFLP			Saxifragaceae	Saxifragales	dicots	narrow		LC
Saxifraga oppositifolia L.	0.00165188	AFLP			Saxifragaceae	Saxifragales	dicots	wide	outcrossing (animal)
Saxifraga rivularis L.	0.000658228	AFLP			Saxifragaceae	Saxifragales	dicots	wide
Saxifraga stellaris L.	0.000765957	AFLP	0.00163636	AFLP	Saxifragaceae	Saxifragales	dicots	wide	outcrossing (animal)
Saxifraga tridactylites L.	0.00245783	AFLP			Saxifragaceae	Saxifragales	dicots	wide
Scabiosa canescens W. & K.	0.00788583	Allozyme			Dipsacaceae	Dipsacales	dicots	narrow	outcrossing (animal)
Scabiosa columbaria L.	0.00912912	Allozyme			Dipsacaceae	Dipsacales	dicots	wide	outcrossing (animal)
Schisandra chinensis (Turcz.) Baill.	0.00419195	SSR	0.00704977	SSR	Schisandraceae	Austrobaileyales	dicots	wide	outcrossing (animal)
Schisandra sphenanthera Rehd. et Wils.	0.00425	SSR	0.00629876	SSR	Schisandraceae	Austrobaileyales	dicots	wide	outcrossing (animal)
Schwalbea americana L.	0.000105528	Allozyme	0.000126761	Allozyme	Orobanchaceae	Lamiales	dicots	narrow
Sclerolaena diacantha (Nees) Benth.	0.00641514	Allozyme			Chenopodiaceae	Caryophyllales	dicots	narrow
Scutellaria baicalensis Georgi			0.00549589	ISSR	Lamiaceae	Lamiales	dicots	wide
Scutellaria indica L.	0.000169355	Allozyme	0.00235929	Allozyme	Lamiaceae	Lamiales	dicots	wide	selfing
Sedum alfredii Hance	0.00212859	RAPD			Crassulaceae	Saxifragales	dicots	wide	sexual & asexual
Sedum ussuriense Kom.	0.00289242	RAPD			Crassulaceae	Saxifragales	dicots	narrow	outcrossing (animal)
Senecio carbonensis C. Ezcurra, M. Ferreyra & S. Clayton	0.0104371	Allozyme	0.0108665	Allozyme	Asteraceae	Asterales	dicots	narrow	sexual & asexual
Senecio gallicus Chaix	0.00367685	Allozyme			Asteraceae	Asterales	dicots	wide	outcrossing
Senecio glaucus L.	0.00874504	Allozyme			Asteraceae	Asterales	dicots	wide	outcrossing
Senecio madagascariensis Poir.	0.00752381	SSR			Asteraceae	Asterales	dicots	wide
Senecio peteroanus Phil.	0.00878723	Allozyme	0.009	Allozyme	Asteraceae	Asterales	dicots	wide	sexual & asexual
Senecio vernalis Waldst. & Kit.	0.00849438	Allozyme			Asteraceae	Asterales	dicots	wide	outcrossing
Serapias vomeracea (Burm. f.) Briq.	0.00265116	SSR			Orchidaceae	Asparagales	monocots	narrow	outcrossing (animal)
Seseli farrenyi Molero & A. Pujadas	0.00887198	Allozyme	0.00943478	Allozyme	Apiaceae	Apiales	dicots	narrow	outcrossing (animal)
Sesleria caerulea (L.) Ard.	0.003	AFLP	0.00514286	AFLP	Poaceae	Poales	monocots		outcrossing (wind)
Sextonia rubra (Mez) van der Werff			0.00962791	SSR	Lauraceae	Laurales	dicots	wide	outcrossing (animal)
Shorea curtisii Dyer ex King	0.00752381	SSR			Dipterocarpaceae	Malvales	dicots	narrow	outcrossing	LC
Shorea leprosula Miq.	0.006	SSR			Dipterocarpaceae	Malvales	dicots	narrow	outcrossing (animal)	EN
Shorea macroptera Dyer	0.00514286	SSR			Dipterocarpaceae	Malvales	dicots	narrow	mixed
Shorea ovalis ssp. sericea (Dyer) P. Ashton	0.00355556	SSR			Dipterocarpaceae	Malvales	dicots	narrow	apomictic	CR
Shorea xanthophylla Sym.			0.00391716	SSR	Dipterocarpaceae	Malvales	dicots	narrow	outcrossing (animal)	CR
Shortia rotundifolia (Maxim.) Makino	0.00190625	SSR			Diapensiaceae	Ericales	dicots	narrow	outcrossing (animal)
Sibbaldiopsis tridentata (Aiton) Rydb.	0.0039787	AFLP			Rosaceae	Rosales	dicots	wide
Sicyos angulatus L.	0.00265675	ISSR	0.00283502	ISSR	Cucurbitaceae	Cucurbitales	dicots	wide	outcrossing
Silene chlorantha (Willd.) Ehrh.	0.002857	AFLP			Caryophyllaceae	Caryophyllales	dicots	narrow	mixed
Silene dioica (L.) Clairv.	0.00808587	Allozyme	0.0110122	Allozyme	Caryophyllaceae	Caryophyllales	dicots	wide	outcrossing (animal)
Silene hifacensis Rouy ex Willk.	0.00195082	Allozyme	0.00534881	Allozyme	Caryophyllaceae	Caryophyllales	dicots	narrow	mixed	EN
Silene latifolia Poir.	0.0161818	SSR			Caryophyllaceae	Caryophyllales	dicots	wide	outcrossing (animal)
Silene nutans L.	0.0051194	Allozyme			Caryophyllaceae	Caryophyllales	dicots	wide	outcrossing
Silene otites (L.) Wibel	0.00303759	AFLP			Caryophyllaceae	Caryophyllales	dicots	narrow	outcrossing (animal)
Silene rupestris L.	0.00145291	AFLP			Caryophyllaceae	Caryophyllales	dicots	wide	outcrossing (animal)
Silene sennenii Pau	0.00160495	Allozyme			Caryophyllaceae	Caryophyllales	dicots	narrow		EN
Silene tatarica (L.) Pers.	0.0017457	AFLP			Caryophyllaceae	Caryophyllales	dicots	narrow
Sinocalycanthus chinensis (Cheng et S.Y. Chang) Cheng et S.Y. Chang	0.000797495	RAPD	0.00415266	RAPD	Calycanthaceae	Laurales	dicots	narrow	mixed
Sinojackia dolichocarpa C. J. Qi	0.00203115	ISSR	0.00407618	ISSR	Styracaceae	Ericales	dicots	narrow		VU
Sinojackia rehderiana Hu			0.00730233	SSR	Styracaceae	Ericales	dicots	narrow	outcrossing (animal)
Sinojackia xylocarpa Hu	0.00288998	SSR			Styracaceae	Ericales	dicots	narrow	outcrossing (animal)	VU
Sinopodophyllum hexandrum (Royle) T. S. Ying	0.000435233	AFLP	0.000658228	AFLP	Berberidaceae	Ranunculales	dicots	narrow	selfing
Sisymbrium austriacum Jacq.	0.00624818	AFLP	0.00732678	AFLP	Berberidaceae	Ranunculales	dicots	wide
Sisyrinchium micranthum Cav.	0.00442105	ISSR			Iridaceae	Asparagales	monocots	wide
Solidago canadensis L.			0.00324934	SSR	Asteraceae	Asterales	dicots	wide	outcrossing
Sonchus gandogeri Pit.	0.00572526	AFLP	0.00735484	AFLP	Asteraceae	Asterales	dicots	narrow	outcrossing (animal)	CR
Sophora moorcroftiana (Benth.) Baker	0.002918	Allozyme	0.00370588	Allozyme	Fabaceae	Fabales	dicots	narrow	outcrossing (animal) & asexual
Sophronitis sincorana (Schltr.) C. Berg & M. W. Chase	0.0152069	Allozyme			Orchidaceae	Asparagales	monocots	narrow	outcrossing (animal)
Sorbus aucuparia L.	0.00408961	Allozyme	0.00508696	Allozyme	Rosaceae	Rosales	dicots	wide	outcrossing (animal)
Spartina alterniflora Loisel.	0.00355556	SSR	0.00338462	AFLP	Poaceae	Poales	monocots	narrow	sexual & asexual
Spiraea virginiana Britt.	0.00128407	SSR			Rosaceae	Rosales	dicots	narrow	sexual & asexual
Spondias purpurea L. (wild)	0.00148618	AFLP	0.0027547	AFLP	Anacardiaceae	Sapindales	dicots	narrow
Stachys maritima Gouan	0.00148394	Allozyme	0.00230744	Allozyme	Lamiaceae	Lamiales	dicots	narrow	outcrossing (animal)
Stenocereus eruca (Brandg.) Gibson & Horak	0.00498064	RAPD			Cactaceae	Caryophyllales	dicots	narrow	sexual & asexual	LC
Stenocereus griseus (Haw.) Buxb.	0.0040298	Allozyme	0.00467237	Allozyme	Cactaceae	Caryophyllales	dicots		outcrossing (animal)	LC
Stenocereus pruinosus (Otto ex Pfeiff.) Buxb. (wild)	0.00514286	SSR			Cactaceae	Caryophyllales	dicots	narrow
Stenocereus stellatus Riccob.	0.00753261	Allozyme			Cactaceae	Caryophyllales	dicots	narrow	outcrossing (animal)	LC
Stipa capillata L.	0.0010719	AFLP			Poaceae	Poales	monocots	wide
Stipa krylovii Roshev.	0.00251683	RAPD	0.00408728	RAPD	Poaceae	Poales	monocots	narrow	outcrossing (wind)
Stipa purpurea Griseb.	0.00219246	ISSR	0.00395793	ISSR	Poaceae	Poales	monocots	narrow	sexual & asexual
Stipa tenacissima (L.) Kunth.	0.00288782	ISSR	0.0044259	ISSR	Poaceae	Poales	monocots	wide	outcrossing (wind)
Streptocarpus primulifolius Gand.	0.002	SSR			Gesneriaceae	Lamiales	dicots	narrow
Streptocarpus rexii (Bowie ex Hook.) Lindl.	0.000197802	SSR			Gesneriaceae	Lamiales	dicots	narrow
Stryphnodendron adstringens (Mart.) Coville	0.0017931	AFLP			Fabaceae	Fabales	dicots	narrow
Suaeda maritima (L.) Dumort	0.00102932	AFLP			Amaranthaceae	Caryophyllales	dicots	wide	selfing
Suaeda salsa (L.) Pall.	0.00460976	Allozyme			Amaranthaceae	Caryophyllales	dicots	wide
Succisa pratensis Moench	0.00460976	Allozyme			Dipsacaceae	Dipsacales	dicots		outcrossing (animal)
Suzukia luchuensis Kudo	0.000671827	Allozyme	0.00634375	Allozyme	Lamiaceae	Lamiales	dicots	narrow
Swertia perennis L.	0.00339024	Allozyme			Gentianaceae	Gentianales	dicots	wide	outcrossing
Swietenia macrophylla King	0.00713242	SSR	0.0114228	SSR	Meliaceae	Sapindales	dicots	wide	outcrossing (animal)	VU
Symphonia globulifera L. f.			0.0116986	SSR	Clusiaceae	Malpighiales	dicots	wide	outcrossing (animal)
Symphyotrichum laurentianum (Fernald) G. L. Nesom	0.00108202	Allozyme	0.00119873	Allozyme	Asteraceae	Asterales	dicots	narrow
Symplocos laurina (Retz.) Wall.	0.00252893	ISSR	0.0043727	ISSR	Symplocaceae	Ericales	dicots	narrow
Syzygium nervosum DC.	0.00930303	Allozyme			Myrtaceae	Myrtales	dicots	wide
Tabebuia aurea (Silva Manso) Benth. & Hook. f. ex S. Moore			0.0357358	SSR	Bignoniaceae	Lamiales	dicots	wide	outcrossing (animal)
Tabebuia ochracea (Cham.) Standl.	0.00156506	SSR			Bignoniaceae	Lamiales	dicots	wide	outcrossing (animal)
Tabebuia roseo-alba (Ridl.) Sandwith	0.00790099	SSR			Bignoniaceae	Lamiales	dicots	wide	mixed
Tacca chantrieri André	0.00276647	ISSR	0.00502174	ISSR	Dioscoreaceae	Dioscoreales	monocots	wide	selfing
Taiwania cryptomerioides Hayata	0.000507772	ISSR	0.00205873	ISSR	Cupressaceae	Pinales	gymnosperm	narrow	outcrossing (wind)	VU
Tamarix chinensis Lour.	0.00328395	ISSR	0.00439685	ISSR	Tamaricaceae	Caryophyllales	dicots	wide	outcrossing (animal)
Tamarix ramosissima Ledeb.	0.00443836	AFLP			Tamaricaceae	Caryophyllales	dicots	wide	sexual & asexual
Taxus baccata L.	0.0037971	SSR	0.00681057	SSR	Taxaceae	Pinales	gymnosperm	wide	outcrossing (wind)	LC
Taxus cuspidata Siebold & Zucc.	0.0049901	Allozyme			Taxaceae	Pinales	gymnosperm	wide	outcrossing (wind)	LC
Taxus fuana Nan Li & R. R. Mill	0.0017142	RAPD	0.0050857	RAPD	Taxaceae	Pinales	gymnosperm	narrow	outcrossing (wind)
Taxus wallichiana var. mairei (Lemée & H. Léveillé) L. K. Fu & Nan Li	0.0036567	ISSR	0.00742966	ISSR	Taxaceae	Pinales	gymnosperm	narrow	outcrossing (wind)
Terminalia franchetii Gagnep.	0.0017457	AFLP	0.00242308	AFLP	Combretaceae	Myrtales	dicots	narrow	outcrossing (wind)
Tetraena mongolica Maxim.	0.00301094	ISSR	0.00378907	ISSR	Zygophyllaceae	Zygophyllales	dicots	narrow	outcrossing (animal)
Tetratheca paynterae Alford ssp. paynterae R. Butcher	0.00314139	SSR	0.00419195	SSR	Elaeocarpaceae	Oxalidales	dicots	narrow	outcrossing (animal)
Theobroma cacao L.			0.00182409	SSR	Malvaceae	Malvales	dicots	wide	outcrossing (animal)
Thlaspi caerulescens J. & C. Presl.	0.00265116	SSR			Brassicaceae	Brassicales	dicots	wide
Thuja occidentalis L.	0.00314139	SSR	0.00393472	SSR	Cupressaceae	Pinales	gymnosperm	wide	mixed	LC
Thymus daenensis ssp. daenensis Cleak	0.00674074	ISSR			Lamiaceae	Lamiales	dicots	narrow
Thymus vulgaris L.	0.00992784	Allozyme	0.0109635	Allozyme	Lamiaceae	Lamiales	dicots	wide
Tillandsia achyrostachys E. Morren ex Baker	0.00559911	Allozyme			Bromeliaceae	Poales	monocots	narrow	outcrossing (animal) & asexual
Tithonia diversifolia (Hemsl.) A. Gray	0.00582161	ISSR	0.00796423	ISSR	Asteraceae	Asterales	dicots	wide
Torreya jackii Chun	0.00115043	RAPD	0.00328053	RAPD	Taxaceae	Cupressales	gymnosperm	narrow	outcrossing (wind)	EN
Tradescantia hirsuticaulis Small	0.00391103	Allozyme	0.00544836	Allozyme	Commelinaceae	Commelinales	monocots	narrow	outcrossing (animal)
Triadica sebifera (L.) Small	0.00466667	SSR			Euphorbiaceae	Malpighiales	dicots	wide	outcrossing (animal)
Tribulus terrestris L.			0.00433333	RAPD	Zygophyllaceae	Zygophyllales	dicots	wide
Tricyrtis ishiiana (Kitag. & T. Koyama) Ohwi & Okuyama	0.00475676	SSR	0.00499301	SSR	Liliaceae	Liliales	monocots	narrow	outcrossing (animal)
Trifolium alpinum L.	0.00211765	AFLP	0.00378947	AFLP	Fabaceae	Fabales	dicots		outcrossing (animal)
Trifolium glomeratum L.	0.00368627	AFLP			Fabaceae	Fabales	dicots	narrow	selfing
Trifolium montanum L.	0.00368627	AFLP			Fabaceae	Fabales	dicots		outcrossing (animal)
Trifolium nigrescens Viv.	0.00577778	AFLP			Fabaceae	Fabales	dicots	wide	outcrossing
Trifolium pratense L.	0.00369801	SSR			Fabaceae	Fabales	dicots	wide	outcrossing	LC
Trifolium repens L.	0.00143785	AFLP			Fabaceae	Fabales	dicots	wide	outcrossing (animal) & asexual
Trigonella caerulea (L.) Ser.			0.00687768	RAPD	Fabaceae	Fabales	dicots	wide	selfing
Trigonobalanus doichangensis (A. Camus) Forman	0.00111509	RAPD	0.00247619	RAPD	Fagaceae	Fagales	dicots	narrow	outcrossing (animal) & outcrossing (wind)
Trigonobalanus verticillata Forman	0.00216765	AFLP	0.00296259	AFLP	Fagaceae	Fagales	dicots	narrow	outcrossing (animal) & outcrossing (wind)
Trillium camschatcense Nemuro	0.00190076	Allozyme	0.00220442	Allozyme	Melanthiaceae	Liliales	monocots	narrow	outcrossing (animal)
Trillium erectum L.	0.00313793	Allozyme			Melanthiaceae	Liliales	monocots	wide	mixed
Trillium kamtschaticum Pall.	0.00073913	Allozyme	0.00112856	Allozyme	Melanthiaceae	Liliales	monocots	narrow	outcrossing (animal)
Trillium reliquum J. D. Freeman	0.00155639	Allozyme	0.00286364	Allozyme	Melanthiaceae	Liliales	monocots	narrow	outcrossing (animal) & asexual
Tripodion tetraphyllum (L.) Fourr.	0.00517808	ISSR			Fabaceae	Fabales	dicots	wide	selfing
Trollius europaeus L.	0.00536614	AFLP			Ranunculaceae	Ranunculales	dicots	wide	outcrossing (animal)
Tuctoria greenei (Vasey) Reeder	0.00752381	SSR			Poaceae	Poales	monocots	narrow	outcrossing (wind)
Typha angustifolia L.	0.00192157	SSR	0.00388235	SSR	Typhaceae	Poales	monocots	wide	sexual & asexual	LC
Typha latifolia L.	0.000816901	SSR	0.0011746	SSR	Typhaceae	Poales	monocots	wide	sexual & asexual
Typha minima Funck ex Hoppe	0.00080683	AFLP	0.00177727	AFLP	Typhaceae	Poales	monocots	narrow	outcrossing (wind) & asexual
Ulmus pumila L.			0.002	SSR	Ulmaceae	Rosales	dicots	wide
Uniola paniculata L.	0.00153219	Allozyme	0.00373498	Allozyme	Poaceae	Poales	monocots	narrow	outcrossing (wind) & asexual
Urtica dioica L.	0.02275	Allozyme			Urticaceae	Rosales	dicots	wide	outcrossing (wind)
Vaccinium uliginosum L.	0.00187582	Allozyme	0.00376415	Allozyme	Ericaceae	Ericales	dicots	wide	sexual & asexual
Valeriana jatamansi Jones	0.00504545	AFLP			Valerianaceae	Dipsacales	dicots	wide
Vallisneria americana Michx.	0.00225532	SSR	0.00302513	SSR	Hydrocharitaceae	Alismatales	monocots	wide	sexual & asexual
Vallisneria spinulosa Yan	0.00558228	Allozyme	0.00627273	Allozyme	Hydrocharitaceae	Alismatales	monocots	wide	sexual & asexual
Vateriopsis seychellarum (Dyer) Yeim	0.00254545	SSR			Dipterocarpaceae	Malvales	dicots	narrow		CR
Vella pseudocytisus ssp. paui Gómez-Campo	0.015088	AFLP	0.0166396	AFLP	Brassicaceae	Brassicales	dicots	narrow	outcrossing (animal)
Vellozia epidendroides Mart.	0.0142349	Allozyme	0.0181791	Allozyme	Velloziaceae	Pandanales	monocots	narrow	outcrossing (animal)
Vellozia gigantea N. L. Menezes & Mello-Silva	0.00313586	ISSR	0.0048172	ISSR	Velloziaceae	Pandanales	monocots	narrow
Vellozia leptopetala Goethart & Henrard	0.00568361	Allozyme	0.00609677	Allozyme	Velloziaceae	Pandanales	monocots	narrow	outcrossing (animal)
Veratrum album L. ssp. oxysepalum (Turcz.) Hultén	0.00956069	SSR			Melanthiaceae	Liliales	monocots	wide
Veratrum stamineum Maxim.	0.0129254	SSR			Melanthiaceae	Liliales	monocots	narrow
Veronica alpine L.			0.000889366	AFLP	Plantaginaceae	Lamiales	dicots	wide
Veronica bellidioides L.			0.000698413	AFLP	Plantaginaceae	Lamiales	dicots	narrow
Veronica chamaedrys L.	0.00228571	AFLP			Plantaginaceae	Lamiales	dicots	wide	sexual & asexual
Verticordia staminosa C. A. Gardner & A. S. George	0.000494371	Allozyme			Myrtaceae	Myrtales	dicots	narrow	mixed
Vicia ramuliflora (Maxim.) Ohwi	0.00147178	RAPD	0.00192366	RAPD	Fabaceae	Fabales	dicots	wide	selfing
Vicia unijuga A. Br.	0.00225822	RAPD	0.00291577	RAPD	Fabaceae	Fabales	dicots	wide	selfing
Viola calaminaria Galmei Veilchen	0.00433333	RAPD	0.00611765	RAPD	Violaceae	Malpighiales	dicots	narrow	outcrossing (animal)
Viola chaerophylloides (Regel) W. var. sieboldiana (Maxim.) Makino	0.00130377	AFLP	0.00340436	AFLP	Violaceae	Malpighiales	dicots	narrow	selfing
Viola eizanensis (Makino) Makino	0.00115789	AFLP	0.00313241	AFLP	Violaceae	Malpighiales	dicots	narrow	selfing
Viola elatior Fries	0.00153791	AFLP			Violaceae	Malpighiales	dicots	narrow	outcrossing (animal)
Viola grayi Franchet & Savatier	0.000333722	SSR			Violaceae	Malpighiales	dicots	narrow
Viola grypoceras A. Gray	0.00381395	SSR			Violaceae	Malpighiales	dicots	wide
Viola kusanoana Makino	0.00124675	SSR			Violaceae	Malpighiales	dicots	narrow
Viola pubescens Ait.	0.00988235	Allozyme	0.00988235	Allozyme	Violaceae	Malpighiales	dicots	wide	mixed
Viola pumila Chaix	0.00215261	AFLP			Violaceae	Malpighiales	dicots	narrow	outcrossing (animal)
Viola stagnina Schreber	0.00174098	AFLP			Violaceae	Malpighiales	dicots	narrow	outcrossing (animal)
Viola tricolor L.	0.00198538	ISSR	0.00285529	ISSR	Violaceae	Malpighiales	dicots	wide	outcrossing
Viscum album L.	0.00263415	AFLP			Santalaceae	Santalales	dicots	wide	outcrossing (animal)
Vitellaria paradoxa C. F. Gaertn.	0.00208163	SSR	0.00456757	RAPD	Sapotaceae	Ericales	dicots	wide	outcrossing (animal)	VU
Vitex negundo L.	0.00433333	RAPD			Lamiaceae	Lamiales	dicots	wide
Vitex rotundifolia L. f.	0.00103568	Allozyme	0.00148394	Allozyme	Lamiaceae	Lamiales	dicots	wide	sexual & asexual
Voanioala gerardii J. Dransf.	0.00310204	SSR			Arecaceae	Arecales	monocots	narrow		CR
Vouacapoua americana Aubl.	0.00204858	SSR			Fabaceae	Fabales	dicots	narrow	outcrossing (animal)	CR
Vriesea gigantea Gaudichaud	0.00275059	SSR	0.00499301	SSR	Bromeliaceae	Poales	monocots	narrow	mixed
Wyethia bolanderi (A. Gray) W. A. Weber	0.0113077	Allozyme	0.0123333	Allozyme	Asteraceae	Asterales	dicots	narrow	sexual & asexual
Wyethia reticulata Greene	0.00663158	Allozyme	0.00816667	Allozyme	Asteraceae	Asterales	dicots	narrow	sexual & asexual
Xanthosoma sagittifolium (L.) Schott			0.00608957	RAPD	Araceae	Alismatales	monocots	wide
Ypsilandra thibetica Franch.	0.00319481	SSR			Melanthiaceae	Liliales	monocots	narrow
Zanthoxylum ailanthoides Sieb. et. Zucc.	0.0029505	SSR	0.00499301	SSR	Rutaceae	Sapindales	dicots	narrow	outcrossing (animal)
Zea diploperennis Iltis, Doebley & Guzman	0.00630819	Allozyme	0.0113	Sequence	Poaceae	Poales	monocots	narrow	outcrossing
Zea luxurians (Durieu & Asch.) R. M. Bird	0.00259551	Allozyme	0.01	Sequence	Poaceae	Poales	monocots
Zea perennis (Hitchc.) Reeves & Mangelsd.			0.014	Sequence	Poaceae	Poales	monocots	narrow	outcrossing
Zeuxine gracilis (Breda) Blume	0.000212121	Allozyme	0.000319797	Allozyme	Orchidaceae	Asparagales	monocots	narrow	outcrossing
Zeuxine strateumatica (L.) Schltr.	0.00014459	RAPD	0.00218692	RAPD	Orchidaceae	Asparagales	monocots	narrow	apomictic	LC
Zingiber zerumbet (L.) Roscoe ex Sm.	0.00452437	AFLP			Zingiberaceae	Zingiberales	monocots	wide	asexual
Zizania latifolia (Griseb.) Stapf	0.00312821	SSR			Poaceae	Poales	monocots	wide	sexual & asexual
Zizania palustris L. var. palustris	0.00370588	Allozyme			Poaceae	Poales	monocots	wide	outcrossing (wind)
Ziziphus celata Judd & Hall	0.00127869	SSR			Rhamnaceae	Rosales	dicots	narrow	outcrossing	VU
Zostera marina L.	0.0017037	SSR			Zosteraceae	Alismatales	monocots	wide		LC
Zostera noltii Hornem.	0.00302513	SSR			Zosteraceae	Alismatales	monocots	wide		LC

## Sheet: Table S7
Table S7 Summary of the taxon numbers, mean π values and standard errors of plant families and orders.
Group	N	Mean	SE
πs_family
Acanthaceae	2	0.00142	0.00055154
Achariaceae	1	0.00202
Acoraceae	1	0.00127
Adoxaceae	1	0.0017
Aizoaceae	3	0.0026	0.00164612
Alismataceae	5	0.001814	0.00218598
Amaranthaceae	4	0.004855	0.00371736
Amaryllidaceae	6	0.00347	0.00210851
Anacardiaceae	6	0.003245	0.00101188
Ancistrocladaceae	1	0.00092
Annonaceae	1	0.00457
Apiaceae	14	0.0028621	0.00206228
Apocynaceae	3	0.0043767	0.00158241
Araceae	1	0.00228
Araucariaceae	1	0.00437
Arecaceae	8	0.002995	0.00249714
Aristolochiaceae	3	0.0020967	0.00043039
Asparagaceae	8	0.0095225	0.00570177
Asteraceae	72	0.0043294	0.00337472
Berberidaceae	8	0.0049162	0.00429385
Betulaceae	3	0.0019933	0.00083524
Bignoniaceae	4	0.00386	0.00329435
Bixaceae	1	0.00144
Boraginaceae	5	0.002522	0.00167011
Brassicaceae	26	0.0053519	0.00738714
Bromeliaceae	10	0.001953	0.00151083
Burseraceae	5	0.0015	0.00059569
Cabombaceae	1	0.00082
Cactaceae	10	0.004848	0.00186549
Calycanthaceae	3	0.0019867	0.00102812
Campanulaceae	15	0.0033733	0.0022535
Caprifoliaceae	3	0.0059933	0.00232397
Caryocaraceae	1	0.01189
Caryophyllaceae	20	0.004327	0.00398086
Casuarinaceae	4	0.0017975	0.00085293
Celastraceae	2	0.003565	0.0019304
Cephalotaxaceae	2	0.00059	5.657e-05
Ceratophyllaceae	2	0.00111	0.00046669
Cercidiphyllaceae	1	0.00998
Chenopodiaceae	1	0.00642
Cistaceae	1	0.0013
Colchicaceae	1	0.00199
Combretaceae	1	0.00175
Commelinaceae	2	0.0033	0.00086267
Convolvulaceae	2	0.011695	0.0121127
Cornaceae	3	0.0042167	0.00025166
Crassulaceae	4	0.0026175	0.0005964
Cucurbitaceae	2	0.001515	0.00161927
Cupressaceae	16	0.0034725	0.00192935
Cycadaceae	4	0.0013275	0.00067539
Cymodoceaceae	2	0.001485	0.00016263
Cyperaceae	16	0.003715	0.00334727
Diapensiaceae	1	0.00191
Dioscoreaceae	3	0.0025	0.00189945
Dipsacaceae	3	0.00721	0.00233547
Dipterocarpaceae	5	0.004954	0.0019644
Elaeagnaceae	4	0.00291	0.00105017
Elaeocarpaceae	1	0.00314
Ericaceae	21	0.0028281	0.00170588
Erythroxylaceae	2	0.006425	0.00484368
Eucommiaceae	1	0.00223
Euphorbiaceae	4	0.0030475	0.00123955
Eupteleaceae	1	0.00328
Fabaceae	68	0.0036696	0.00296087
Fagaceae	29	0.0059031	0.00242747
Gentianaceae	7	0.0018543	0.00115403
Geraniaceae	6	0.001815	0.00073427
Gesneriaceae	5	0.003044	0.00233802
Ginkgoaceae	1	0.006
Hydrangeaceae	1	0.00592
Hydrocharitaceae	4	0.0023075	0.00230407
Hypericaceae	2	0.003825	4.95e-05
Iridaceae	5	0.004006	0.00149321
Juglandaceae	1	0.00203
Juncaceae	3	0.0017	0.00092973
Lamiaceae	19	0.0034458	0.00270264
Lauraceae	3	0.00647	0.00544769
Lentibulariaceae	1	0.00615
Liliaceae	10	0.00315	0.0012071
Limnanthaceae	1	0.00047
Lythraceae	1	0.01282
Mackinlayaceae	1	0.00112
Magnoliaceae	13	0.0029908	0.00182645
Malvaceae	3	0.00335	0.00161707
Melanthiaceae	10	0.004356	0.00407734
Melastomataceae	1	0.00115
Meliaceae	4	0.003335	0.00271981
Menyanthaceae	2	0.00077	0.00048083
Molluginaceae	1	0.0006
Moraceae	3	0.0018833	0.00038553
Moringaceae	1	0.00086
Musaceae	1	0.0011
Myricaceae	4	0.004295	0.00321017
Myrsinaceae	6	0.0013367	0.00079066
Myrtaceae	18	0.00639	0.00420659
Nothofagaceae	2	0.00353	0.00275772
Nyctaginaceae	2	0.003395	0.00217082
Nymphaeaceae	1	0.00208
Ochnaceae	1	0.00217
Oleaceae	5	0.005196	0.00322856
Onagraceae	2	0.00594	0.00408708
Orchidaceae	36	0.0037494	0.00347508
Orobanchaceae	8	0.001825	0.00203933
Oxalidaceae	1	0.00379
Paeoniaceae	1	0.00194
Papaveraceae	3	0.00183	0.00208238
Philydraceae	1	0.004
Phrymaceae	3	0.00146	0.00053028
Pinaceae	36	0.0041864	0.00210419
Piperaceae	1	0.00305
Plantaginaceae	20	0.00386	0.00248144
Plumbaginaceae	3	0.0021367	0.0007221
Poaceae	46	0.0035489	0.00449962
Podocarpaceae	1	0.00427
Polemoniaceae	2	0.005055	0.00017678
Polygonaceae	7	0.0028329	0.00163597
Pontederiaceae	2	0.00055	0.00011314
Posidoniaceae	2	0.000805	6.364e-05
Potamogetonaceae	2	0.00302	0.00158392
Primulaceae	11	0.0028936	0.00207096
Proteaceae	16	0.0029869	0.00116368
Ranunculaceae	24	0.0047846	0.00652855
Rhamnaceae	5	0.001664	0.00040303
Rhizophoraceae	5	0.003292	0.00611764
Rosaceae	12	0.0027775	0.00161991
Rubiaceae	13	0.0021685	0.00172318
Rutaceae	3	0.0027	0.00066144
Salicaceae	8	0.0041512	0.00304509
Santalaceae	3	0.0022	0.00060357
Sapindaceae	3	0.0039033	0.00134886
Sapotaceae	2	0.002365	0.00040305
Sarraceniaceae	5	0.003142	0.00171855
Saxifragaceae	8	0.00112	0.00064025
Schisandraceae	2	0.00422	4.243e-05
Scrophulariaceae	1	0.00198
Solanaceae	2	0.00245	0.00098995
Stemonaceae	2	0.00165	0.00049497
Styracaceae	3	0.00284	0.00078619
Symplocaceae	1	0.00253
Tamaricaceae	3	0.0054333	0.00278613
Taxaceae	5	0.003062	0.00158927
Theaceae	5	0.004132	0.00325631
Thymelaeaceae	1	0.00173
Typhaceae	3	0.0011833	0.00063799
Ulmaceae	1	0.0057
Urticaceae	1	0.02275
Valerianaceae	1	0.00505
Velloziaceae	3	0.0076833	0.00581008
Verbenaceae	2	0.003005	0.00214253
Violaceae	11	0.00268	0.00265635
Xanthorrhoeaceae	1	0.00821
Zamiaceae	3	0.01149	0.00553328
Zingiberaceae	2	0.008425	0.0055225
Zosteraceae	2	0.002365	0.00094045
Zygophyllaceae	2	0.006025	0.00426385
πs_order
Acorales	1	0.00127
Alismatales	18	0.0019961	0.00162385
Apiales	15	0.002746	0.00203754
Arecales	8	0.002995	0.00249714
Asparagales	56	0.0046468	0.00409792
Asterales	89	0.0040883	0.00322244
Austrobaileyales	2	0.00422	4.243e-05
Brassicales	28	0.0050171	0.00721397
Caryophyllales	55	0.0039911	0.00300774
Celastrales	2	0.003565	0.0019304
Ceratophyllales	2	0.00111	0.00046669
Commelinales	5	0.00234	0.00171493
Cornales	4	0.0046425	0.0008761
Cucurbitales	2	0.001515	0.00161927
Cupressales	1	0.00115
Cycadales	7	0.0056829	0.00631992
Dioscoreales	3	0.0025	0.00189945
Dipsacales	8	0.005795	0.00253994
Ericales	57	0.0028668	0.00185864
Fabales	68	0.0036696	0.00296087
Fagales	43	0.0048984	0.00273241
Garryales	1	0.00223
Gentianales	23	0.0023609	0.00169356
Geraniales	6	0.001815	0.00073427
Ginkgoales	1	0.006
Lamiales	75	0.0033051	0.0025047
Laurales	6	0.0042283	0.00428063
Liliales	21	0.003669	0.00294082
Magnoliales	14	0.0031036	0.00180484
Malpighiales	35	0.0036549	0.0034975
Malvales	11	0.0035718	0.00208478
Myrtales	23	0.0062009	0.00430349
Nymphaeales	2	0.00145	0.00089095
Oxalidales	2	0.003465	0.00045962
Pandanales	5	0.00527	0.00527827
Pinales	60	0.0038375	0.00203682
Piperales	4	0.002335	0.0005922
Poales	78	0.0032163	0.00385882
Proteales	16	0.0029869	0.00116368
Ranunculales	36	0.0045258	0.00571769
Rosales	26	0.0033612	0.00419702
Santalales	3	0.0022	0.00060357
Sapindales	21	0.0028629	0.00154316
Saxifragales	14	0.0022393	0.00239453
Solanales	4	0.0070725	0.00881605
Zingiberales	3	0.0059833	0.00575623
Zygophyllales	2	0.006025	0.00426385
πt_family
Acanthaceae	2	0.00218	0.00148492
Achariaceae	1	0.00205
Acoraceae	1	0.00327
Adoxaceae	1	0.002
Aizoaceae	2	0.003155	0.00296278
Alismataceae	4	0.0013625	0.00074799
Amaranthaceae	2	0.00824	0.00441235
Amaryllidaceae	4	0.003005	0.00047262
Anacardiaceae	8	0.0042525	0.00218242
Ancistrocladaceae	1	0.0009
Annonaceae	2	0.00342	0.0034224
Apiaceae	6	0.0045083	0.00256395
Apocynaceae	2	0.005765	0.0025668
Araceae	1	0.00609
Araliaceae	2	0.003305	0.00088388
Araucariaceae	3	0.00331	0.00166721
Arecaceae	3	0.00432	0.00077949
Aristolochiaceae	3	0.01278	0.0174248
Asparagaceae	6	0.00518	0.00526186
Asteraceae	57	0.0063096	0.00541263
Berberidaceae	8	0.0063575	0.00368359
Betulaceae	2	0.00227	0.00166877
Bignoniaceae	2	0.019135	0.023483
Boraginaceae	2	0.00371	0.00234759
Brassicaceae	29	0.0083707	0.00954734
Bromeliaceae	8	0.0034062	0.00167251
Burseraceae	1	0.00399
Cactaceae	5	0.005892	0.00174922
Calycanthaceae	3	0.0043267	0.00097705
Campanulaceae	12	0.0044608	0.00241884
Caprifoliaceae	3	0.0078033	0.00209612
Caryophyllaceae	10	0.006485	0.00407283
Celastraceae	1	0.00363
Cephalotaxaceae	3	0.0020267	0.00128204
Ceratophyllaceae	2	0.005155	0.00180312
Cistaceae	1	0.00108
Clusiaceae	1	0.0117
Colchicaceae	1	0.00527
Combretaceae	1	0.00242
Commelinaceae	1	0.00545
Convolvulaceae	1	0.00158
Cornaceae	2	0.00634	0.00076368
Crassulaceae	2	0.005075	0.00160513
Cucurbitaceae	3	0.0030367	0.00185284
Cupressaceae	16	0.0040456	0.00204373
Cycadaceae	3	0.0029633	0.00111903
Cyperaceae	11	0.0061573	0.00437263
Dioscoreaceae	4	0.003	0.00232145
Dipterocarpaceae	4	0.00454	0.00163957
Elaeagnaceae	4	0.0038075	0.00117185
Elaeocarpaceae	1	0.00419
Ericaceae	13	0.0048846	0.00350065
Euphorbiaceae	2	0.00299	0.00209304
Fabaceae	53	0.0042111	0.00332431
Fagaceae	25	0.0061036	0.00348949
Gentianaceae	2	0.0031	0.00041012
Geraniaceae	2	0.002165	0.00038891
Gesneriaceae	2	0.005345	0.00113844
Ginkgoaceae	1	0.00788
Hydrangeaceae	1	0.01186
Hydrocharitaceae	3	0.0036233	0.00240552
Hypericaceae	1	0.00676
Iridaceae	1	0.00631
Juglandaceae	1	0.00512
Juncaceae	2	0.00197	0.00069296
Lamiaceae	17	0.0038341	0.00261386
Lauraceae	4	0.00859	0.00530069
Lentibulariaceae	1	0.00769
Liliaceae	7	0.0040786	0.00181861
Mackinlayaceae	1	0.0039
Magnoliaceae	12	0.0059975	0.00447284
Malvaceae	7	0.0027686	0.00195682
Melanthiaceae	3	0.0020633	0.00087306
Melastomataceae	1	0.0061
Meliaceae	3	0.0090967	0.0049796
Menyanthaceae	2	0.005135	0.00429214
Molluginaceae	1	0.00146
Moraceae	1	0.00213
Musaceae	1	0.00234
Myricaceae	4	0.00324	0.00061725
Myrsinaceae	3	0.0186767	0.0250024
Myrtaceae	16	0.0080256	0.00712293
Nothofagaceae	2	0.00457	0.00349311
Nyctaginaceae	1	0.00649
Nymphaeaceae	2	0.00255	0.00243245
Oleaceae	3	0.00413	0.00041509
Orchidaceae	23	0.0042448	0.00326334
Orobanchaceae	7	0.0032429	0.0028603
Paeoniaceae	1	0.00597
Papaveraceae	2	0.00274	0.00349311
Phrymaceae	4	0.0042925	0.00492667
Pinaceae	37	0.0087205	0.0135591
Piperaceae	1	0.00483
Plantaginaceae	16	0.0043044	0.00227177
Plumbaginaceae	3	0.0030333	0.00151143
Poaceae	44	0.0072068	0.00627454
Polemoniaceae	1	0.0062
Polygonaceae	4	0.006455	0.00097065
Pontederiaceae	1	0.0064
Potamogetonaceae	1	0.00459
Primulaceae	11	0.0038945	0.00280604
Proteaceae	9	0.0045256	0.00250044
Ranunculaceae	12	0.01515	0.0359214
Rhamnaceae	4	0.00258	0.00087044
Rhizophoraceae	5	0.005224	0.00427601
Rosaceae	8	0.00565	0.00356691
Rubiaceae	3	0.0044867	0.00282518
Rutaceae	4	0.0040375	0.00098979
Salicaceae	6	0.0043317	0.00267825
Santalaceae	2	0.003815	9.192e-05
Sapindaceae	2	0.00561	0.00049497
Sapotaceae	2	0.00823	0.00517602
Sarraceniaceae	5	0.003998	0.00196795
Saxifragaceae	3	0.00165	0.0003751
Schisandraceae	2	0.006675	0.00053033
Scrophulariaceae	1	0.00962
Solanaceae	7	0.0090043	0.00941884
Stemonaceae	2	0.0052	0.00113137
Styracaceae	2	0.00569	0.00227688
Symplocaceae	1	0.00437
Tamaricaceae	2	0.0067	0.00325269
Taxaceae	4	0.0056525	0.00186588
Theaceae	8	0.00662	0.00305784
Typhaceae	3	0.0022767	0.00142163
Ulmaceae	2	0.00492	0.0041295
Velloziaceae	3	0.0097	0.00737173
Verbenaceae	2	0.00434	0.00185262
Violaceae	5	0.005078	0.00298642
Zamiaceae	1	0.00193
Zygophyllaceae	3	0.00614	0.00361277
πt_order
Acorales	1	0.00327
Alismatales	9	0.003	0.00215694
Apiales	9	0.0041733	0.00211857
Arecales	3	0.00432	0.00077949
Asparagales	34	0.0043247	0.00343262
Asterales	71	0.0059641	0.00501239
Austrobaileyales	2	0.006675	0.00053033
Brassicales	29	0.0083707	0.00954734
Caryophyllales	31	0.0056216	0.00319907
Celastrales	1	0.00363
Ceratophyllales	2	0.005155	0.00180312
Commelinales	2	0.005925	0.00067175
Cornales	3	0.00818	0.0032324
Cucurbitales	3	0.0030367	0.00185284
Cupressales	1	0.00328
Cycadales	4	0.002705	0.00104965
Dioscoreales	4	0.003	0.00232145
Dipsacales	4	0.0063525	0.0033688
Ericales	46	0.0059507	0.00694713
Fabales	53	0.0042111	0.00332431
Fagales	34	0.0054221	0.0033049
Gentianales	7	0.0044557	0.00222962
Geraniales	2	0.002165	0.00038891
Ginkgoales	1	0.00788
Lamiales	59	0.0046278	0.00486004
Laurales	7	0.0067629	0.00442267
Liliales	11	0.0036373	0.00181189
Magnoliales	14	0.0056293	0.00432498
Malpighiales	21	0.0049519	0.00329197
Malvales	12	0.0032183	0.00200034
Myrtales	18	0.0076072	0.00682996
Nymphaeales	2	0.00255	0.00243245
Oxalidales	1	0.00419
Pandanales	5	0.0079	0.00579363
Pinales	62	0.0068182	0.0107552
Piperales	4	0.0107925	0.0147722
Poales	68	0.0062184	0.00559479
Proteales	9	0.0045256	0.00250044
Ranunculales	22	0.0108245	0.0265616
Rosales	19	0.0043537	0.00284129
Santalales	2	0.003815	9.192e-05
Sapindales	18	0.0051483	0.00293067
Saxifragales	6	0.0035117	0.00219939
Solanales	8	0.0080763	0.00910665
Zingiberales	1	0.00234
Zygophyllales	3	0.00614	0.00361277
